# Supplementary material for: Cardiac Molecular Remodeling by Anticancer Drugs: Doxorubicin Affects More Metabolism While Mitoxantrone Impacts More Autophagy in Adult CD-1 Male Mice
Source: MDPI journal article supplement (doi:10.3390/biom13060921), 2023-05-31

GLUT4 - Ponceau S

Samples order from the molecular weight marker: This study **MTX** | **DOX18** | **CTRL** | DOX9-1 | CTRL-2 | DOX9-2 | Other study

1

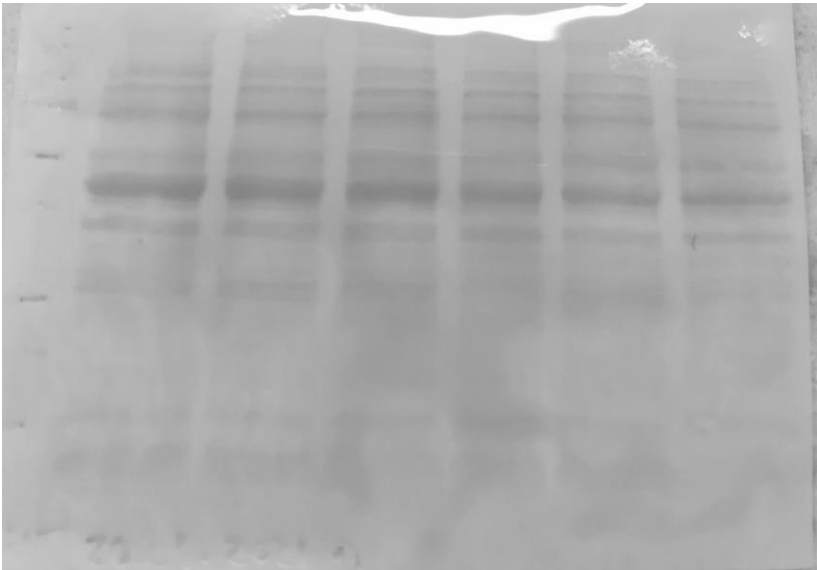

2

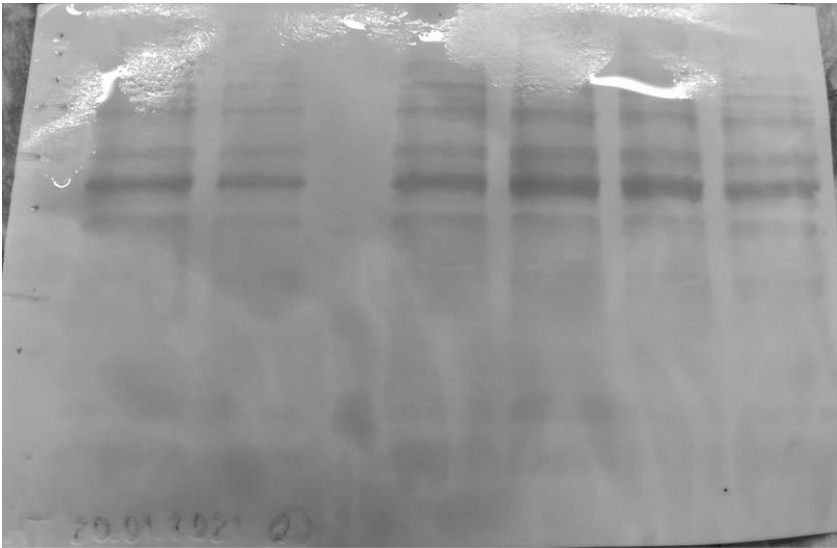

3

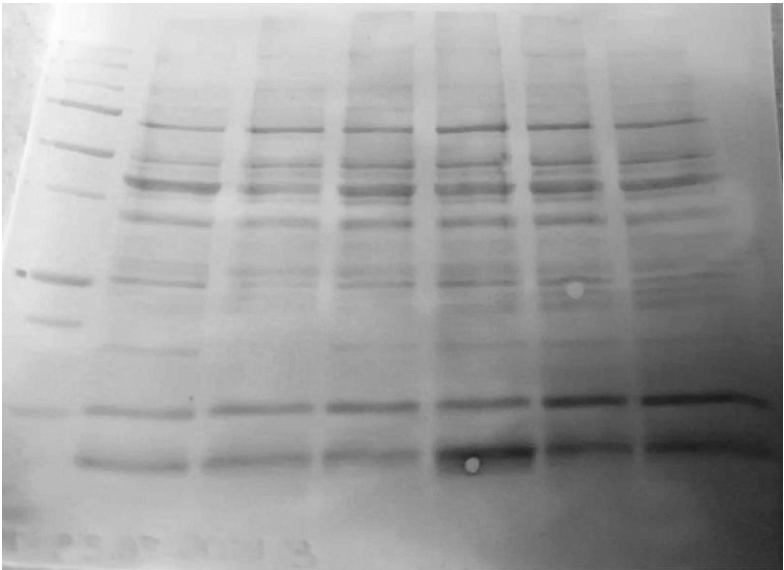

4

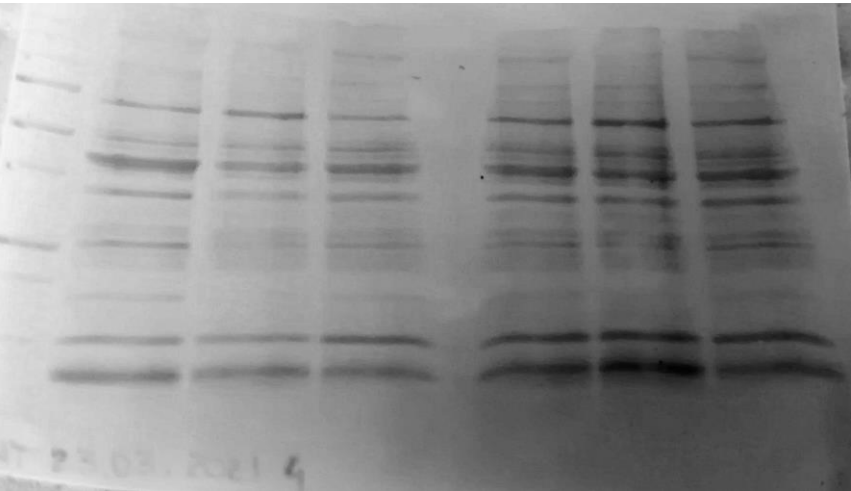

5

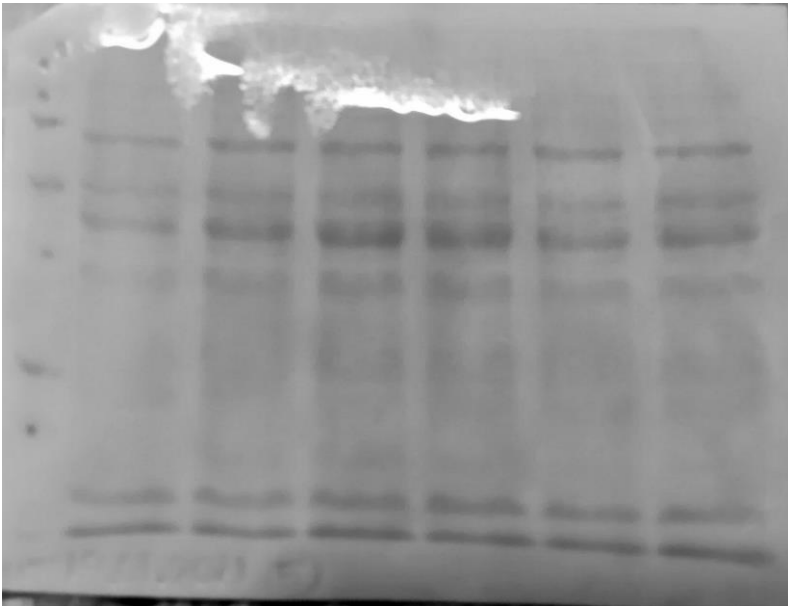

6

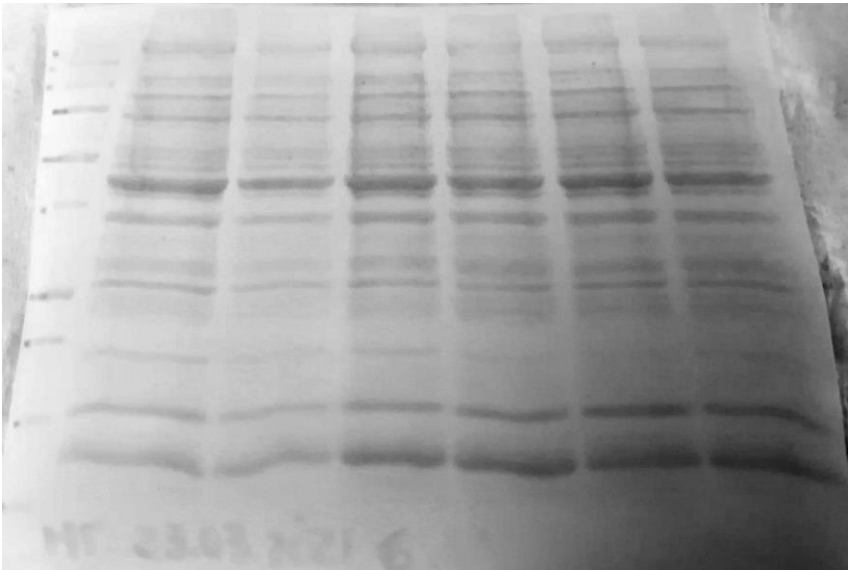

GLUT4 - Blot

Samples order from the molecular weight marker: **MTX** | **DOX18** | **CTRL** | DOX9-1 | CTRL-2 | DOX9-2

This study

Other study

1

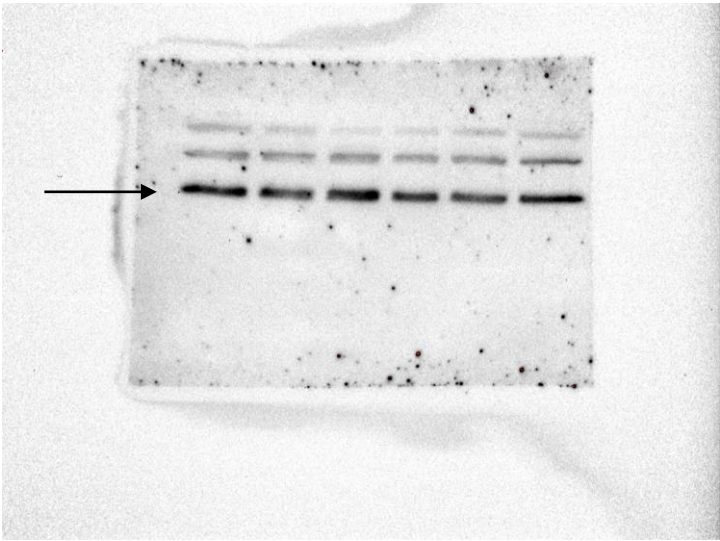

2

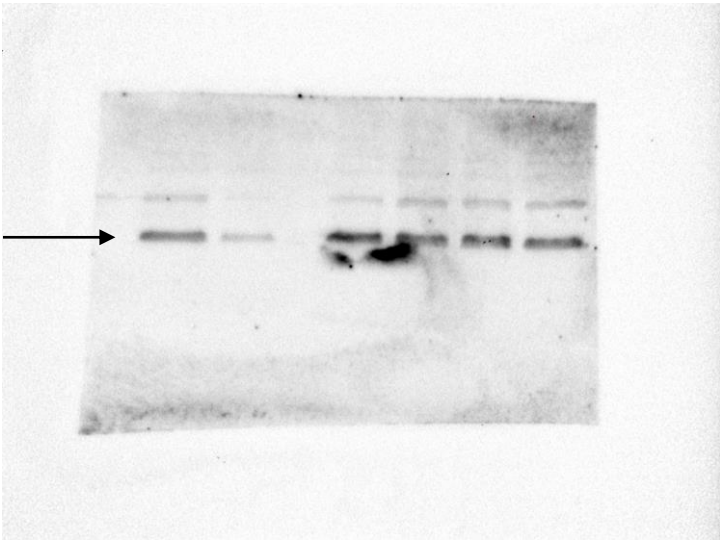

3

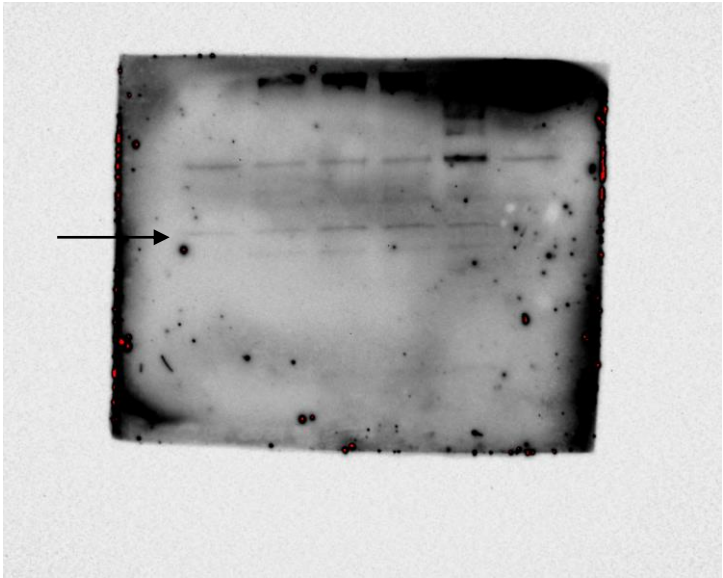

4

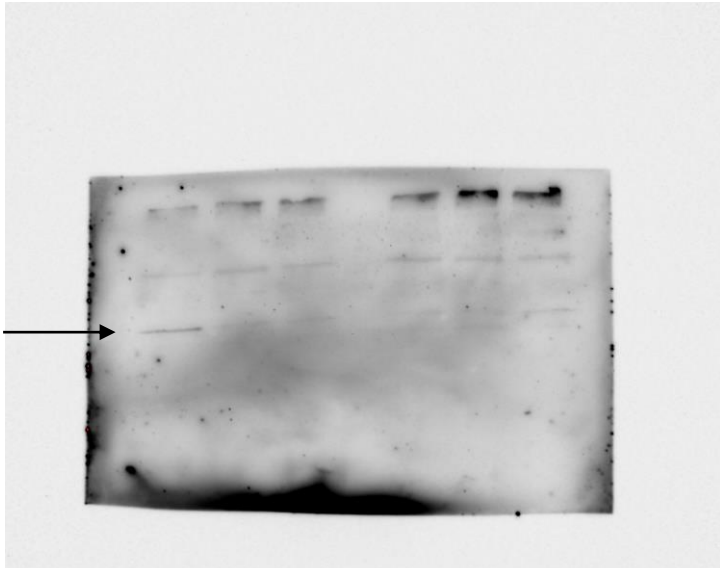

5

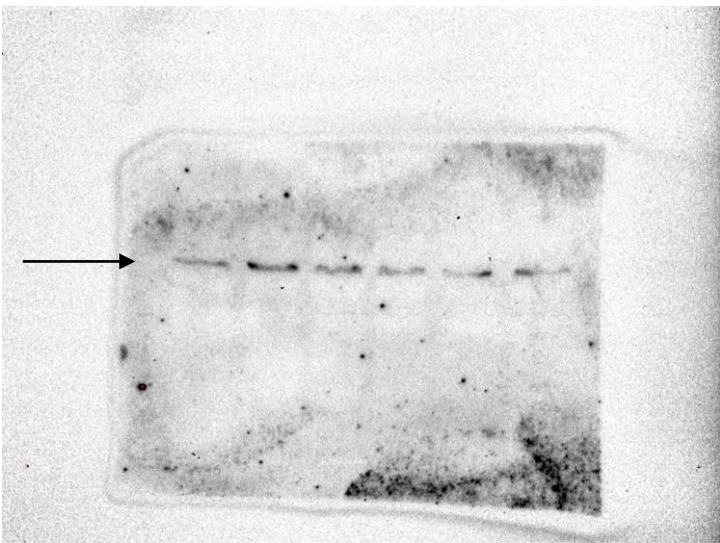

6

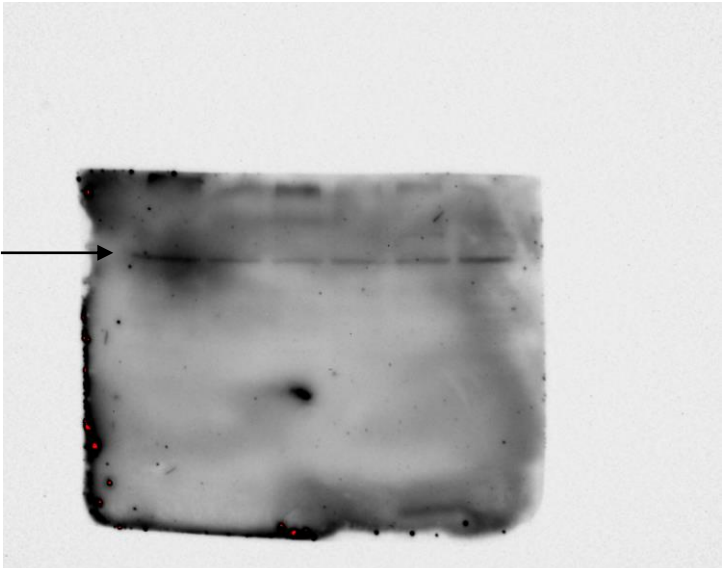

PFKM - Ponceau S

Samples order from the molecular weight marker: MTX | DOX18 | CTRL | DOX9-1 | CTRL-2 | DOX9-2

Other study

1

2

3

4

5

6

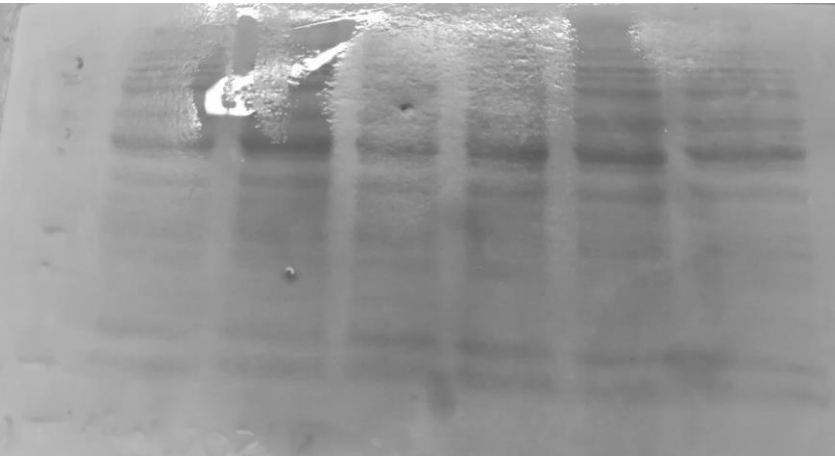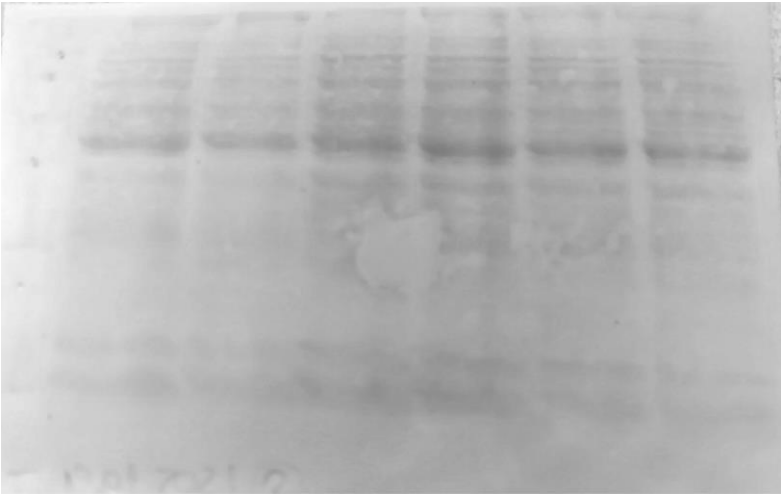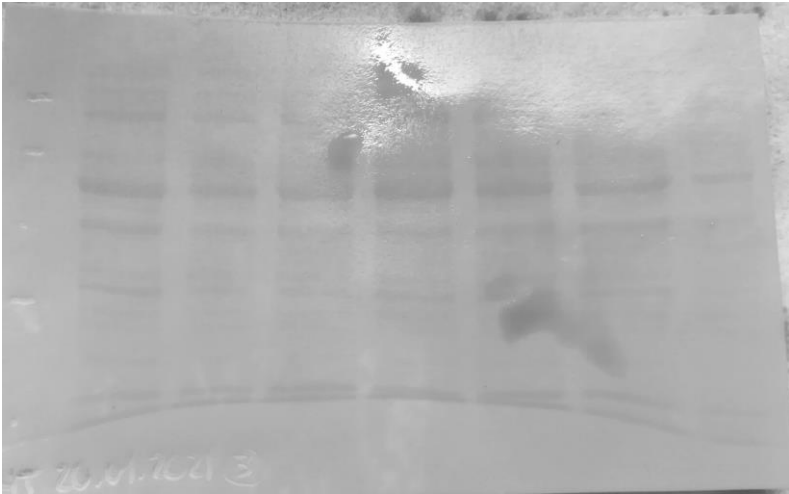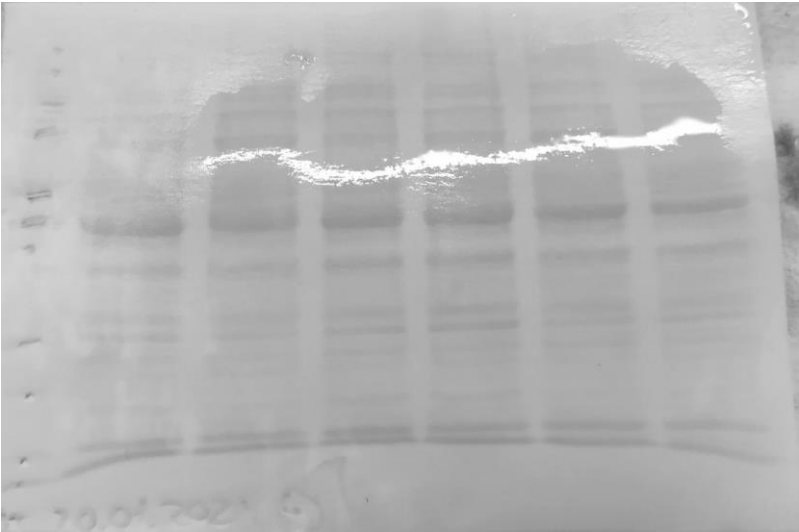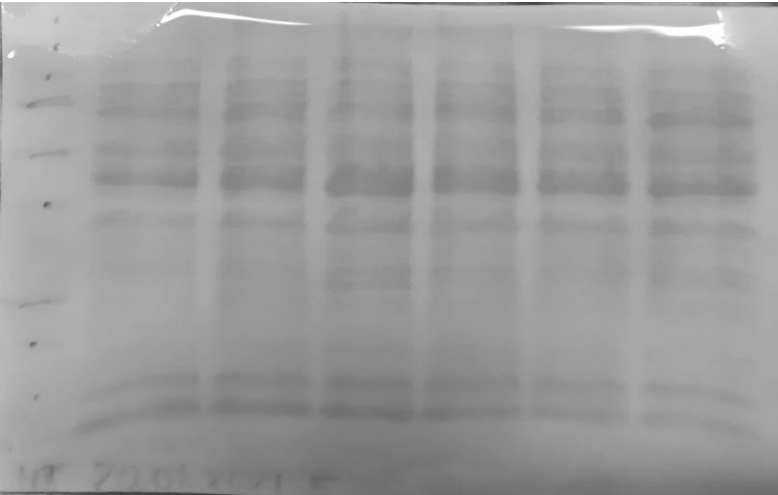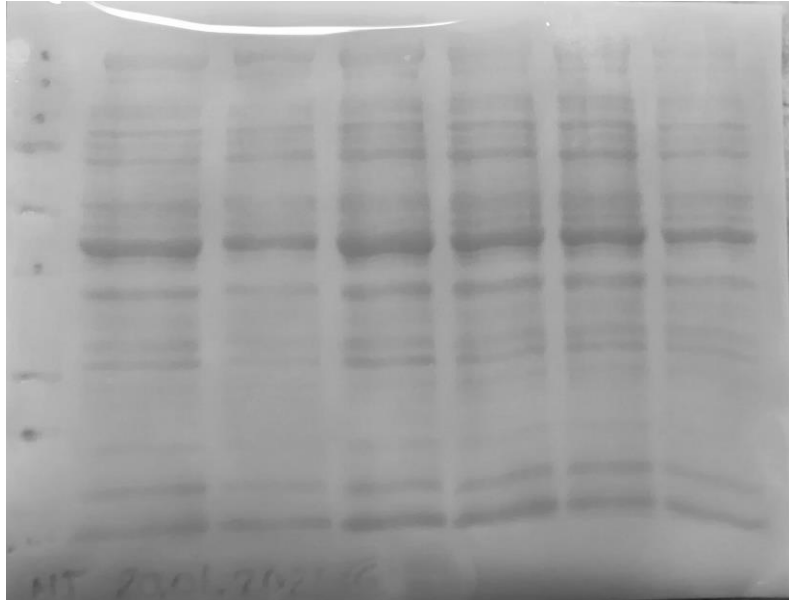



PFKM - Blot

Samples order from the molecular weight marker: MTX | DOX18 | CTRL | DOX9-1 | CTRL-2 | DOX9-2

This study  
Other study

1

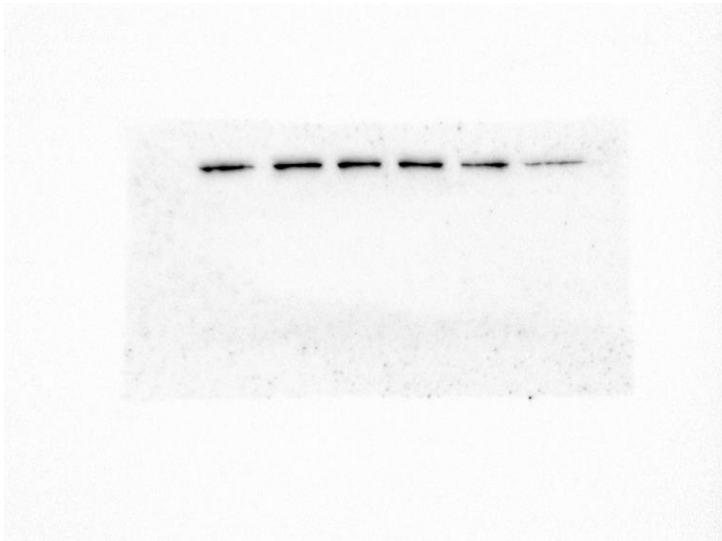

2

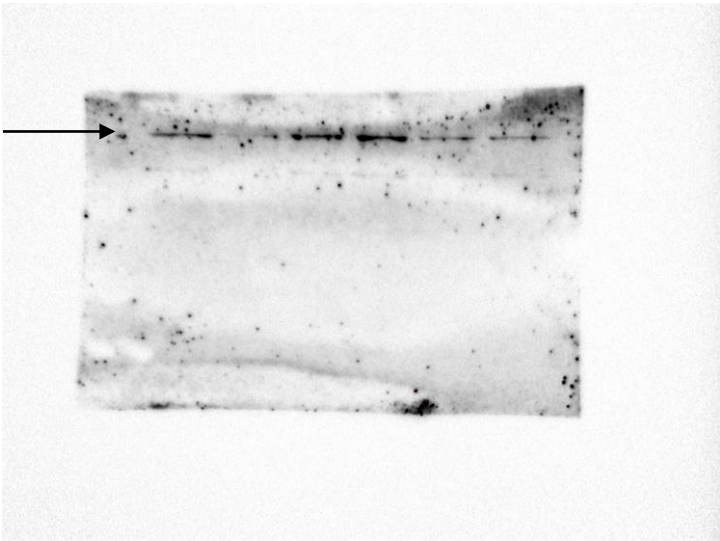

3

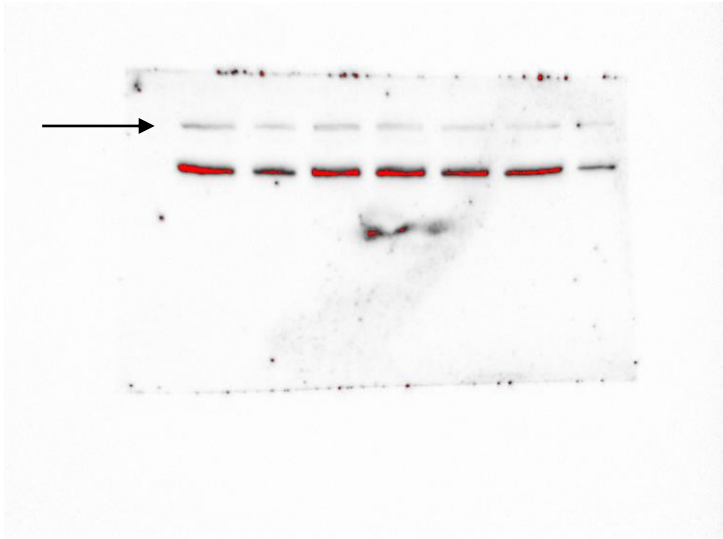

4

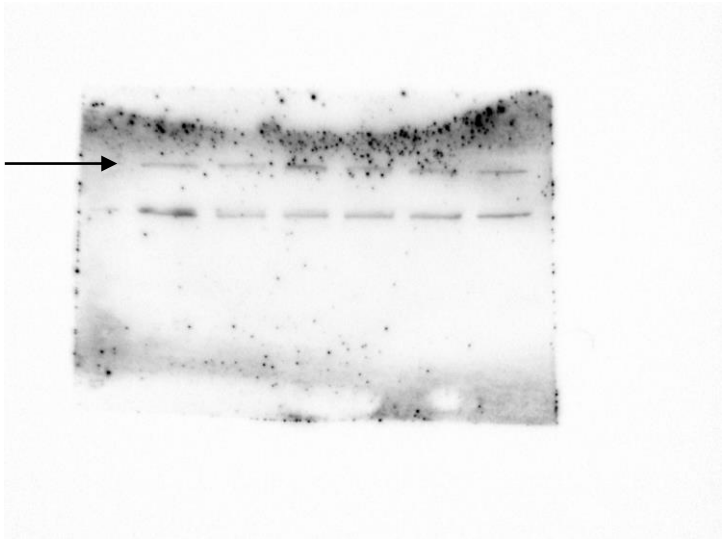

5

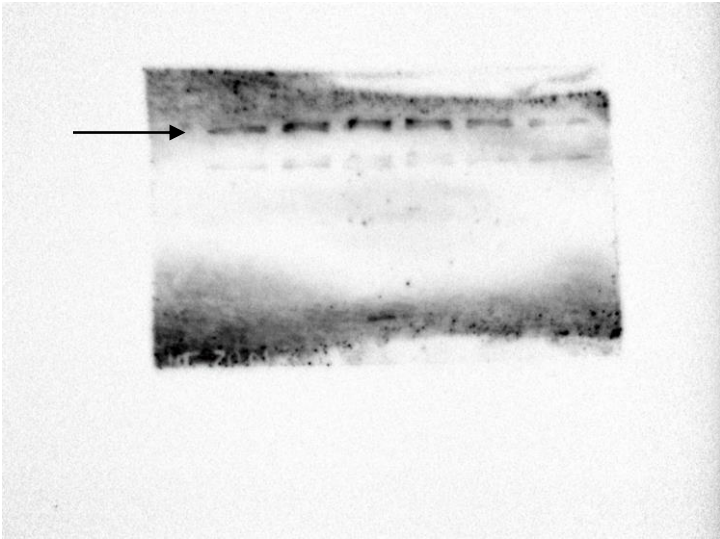

6

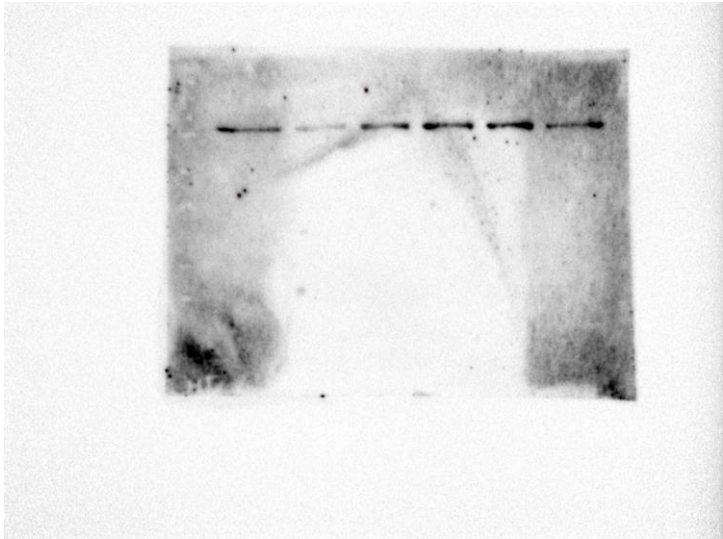

GAPDH - Ponceau S

Samples order from the molecular weight marker: **MTX** | **DOX18** | **CTRL** | DOX9-1 | CTRL-2 | DOX9-2

This study

Other study

3

1

2

6

5

4

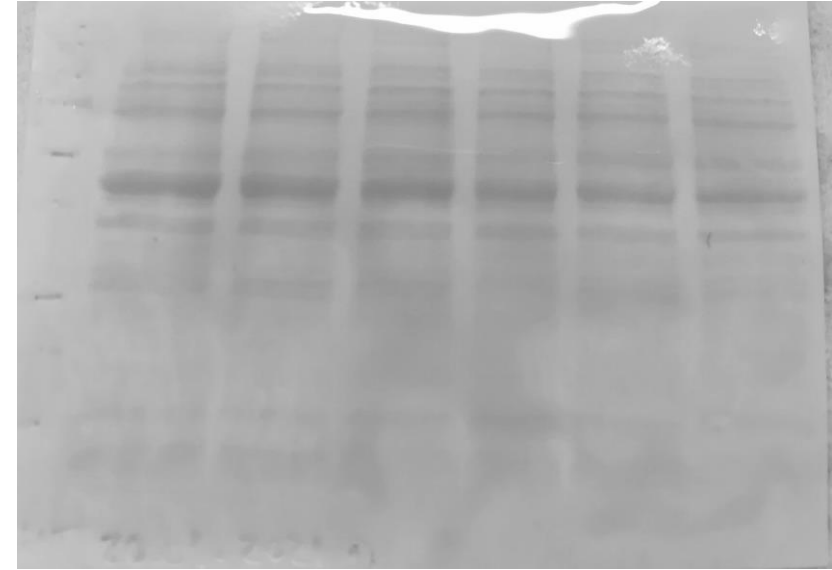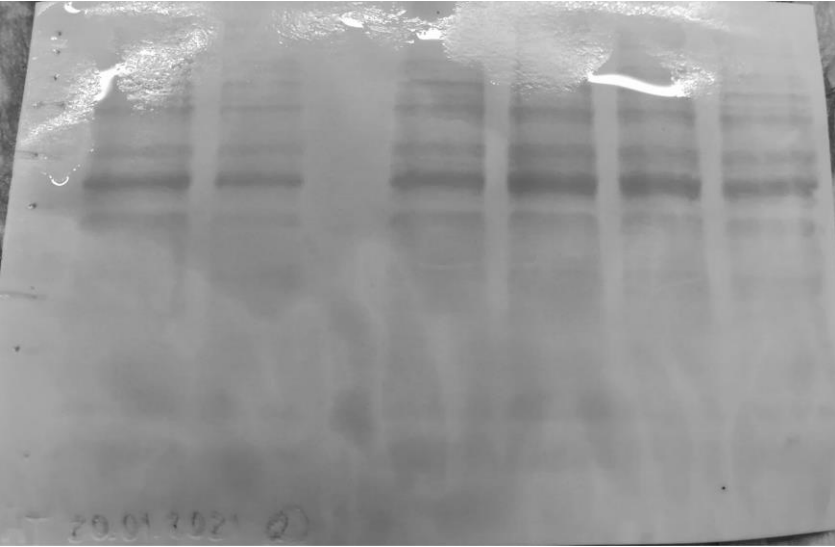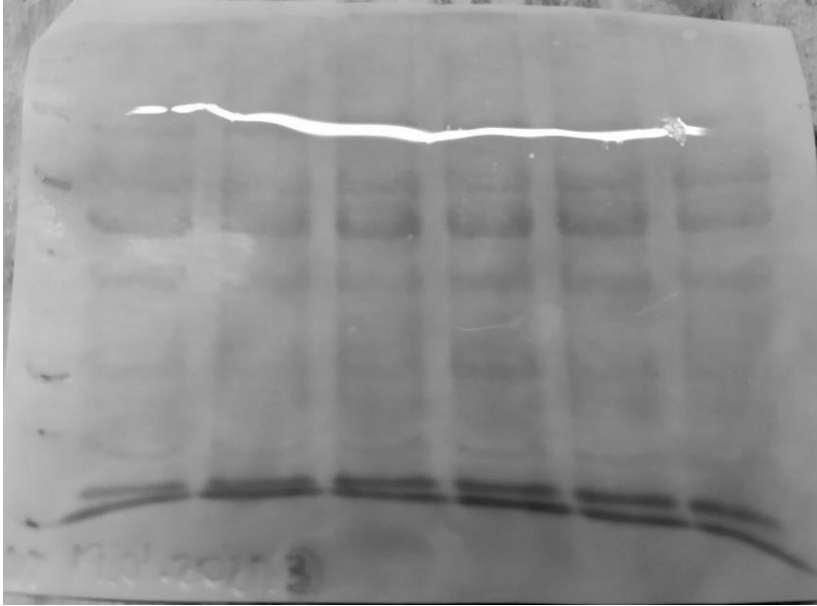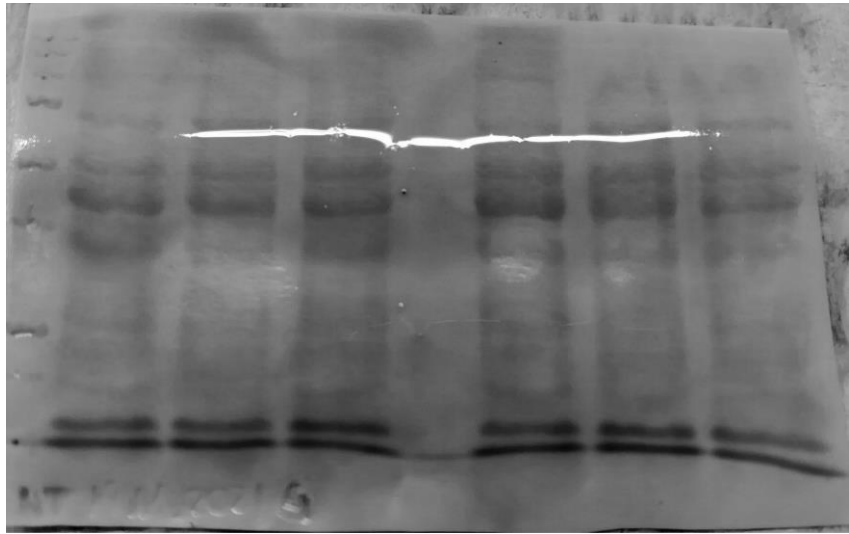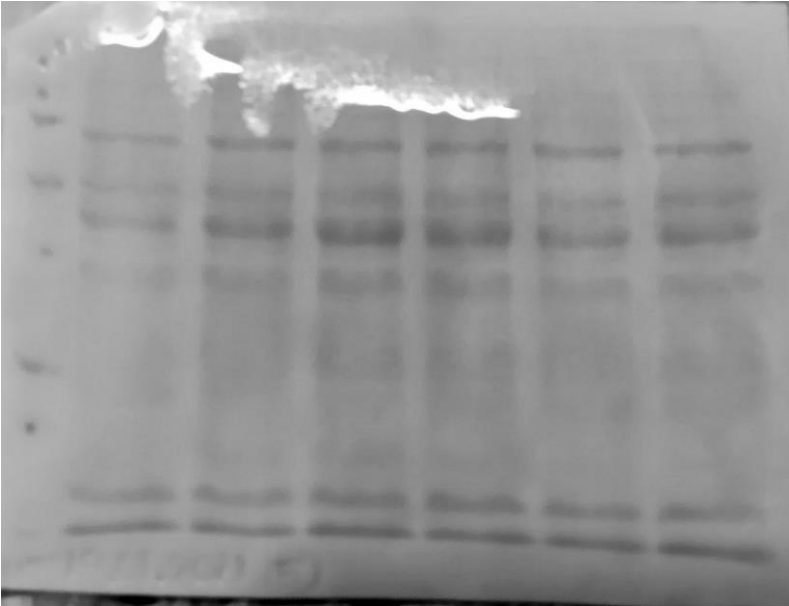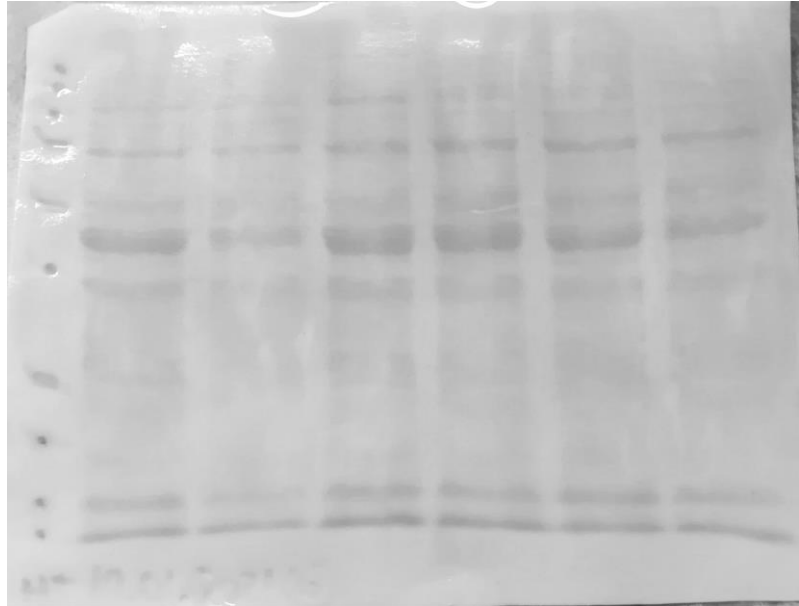

GAPDH - Blot

This study  
 Samples order from the molecular weight marker: **MTX** | **DOX18** | **CTRL** | DOX9-1 | CTRL-2 | DOX9-2  
 Other study

1

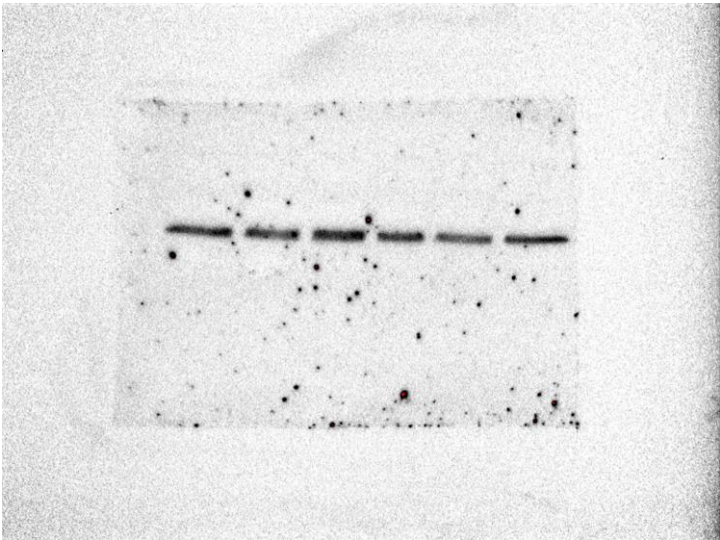

2

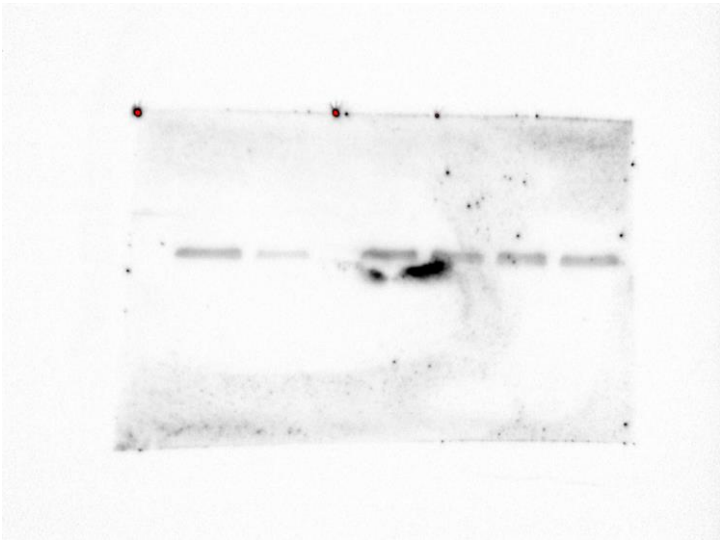

3

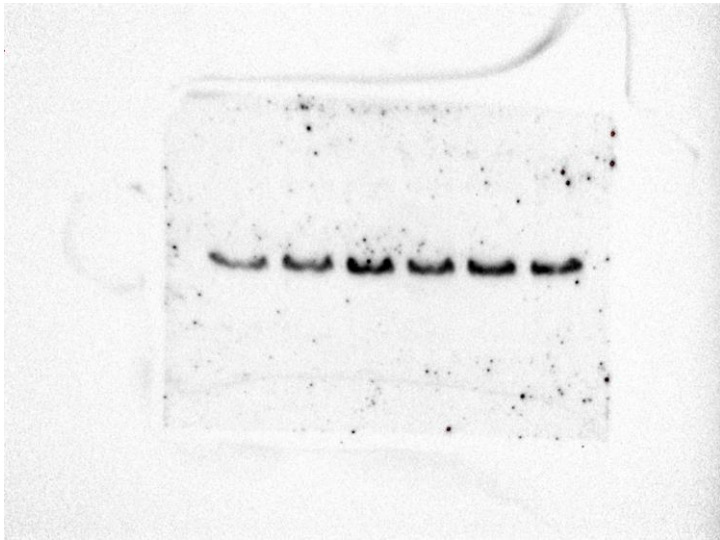

4

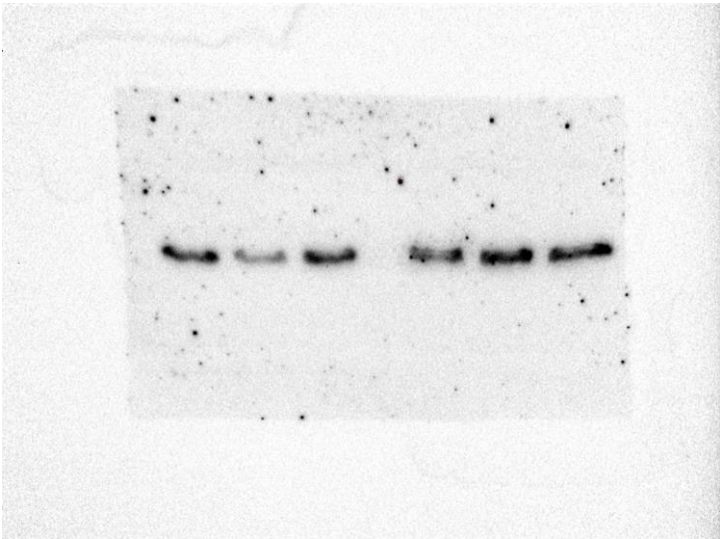

5

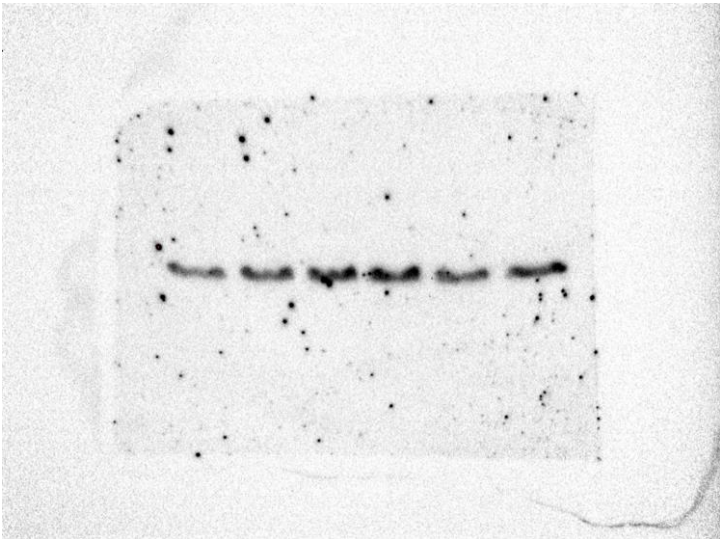

6

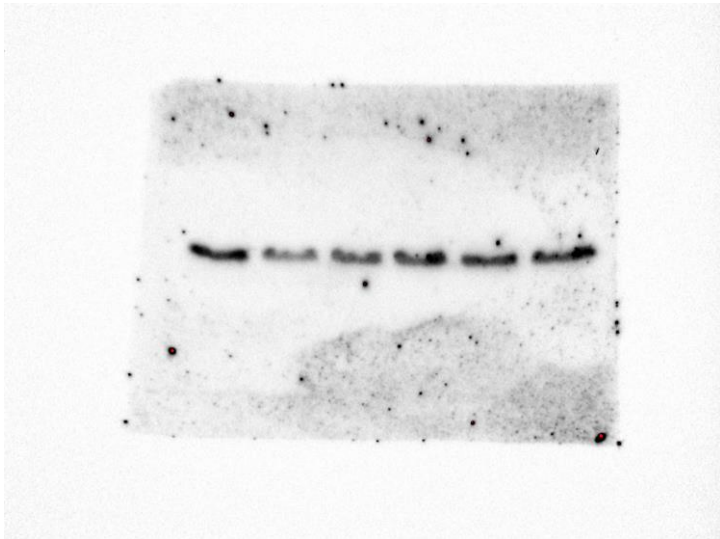



ETFDH - Ponceau S

Samples order from the molecular weight marker: This study **MTX | DOX18 | CTRL** | DOX9-1 | CTRL-2 | DOX9-2  
Other study

1

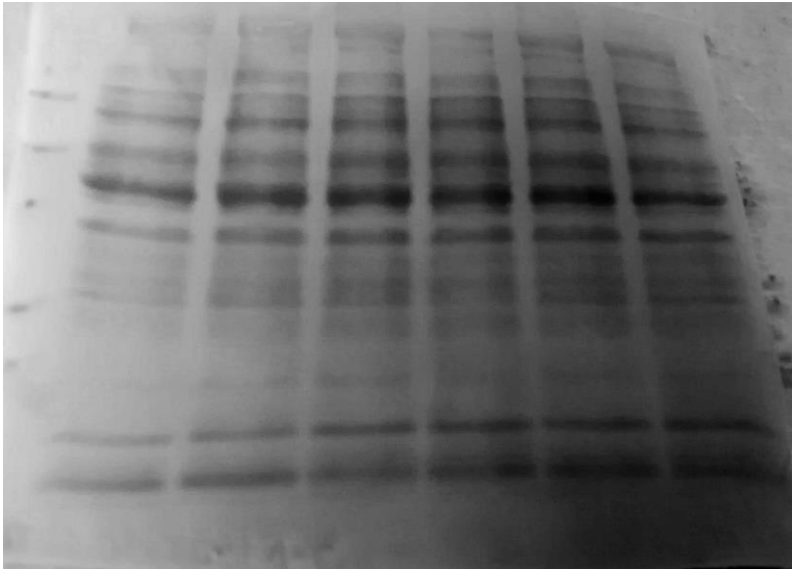

2

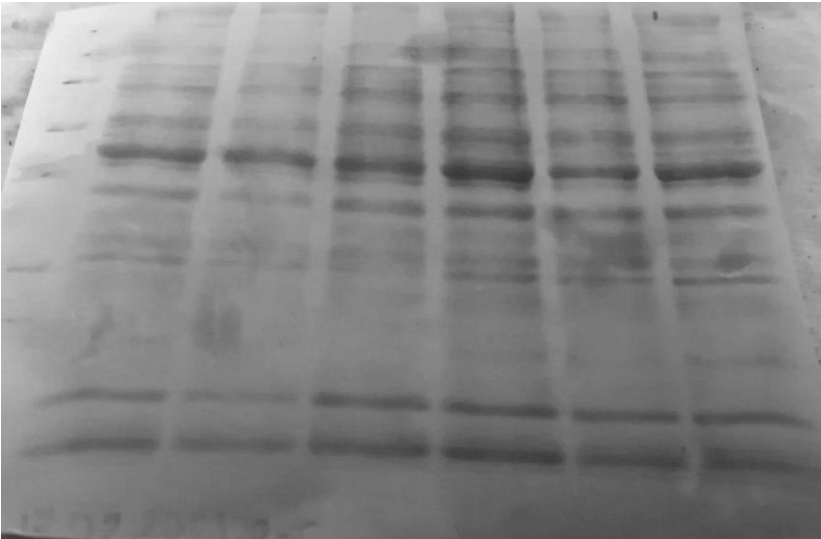

3

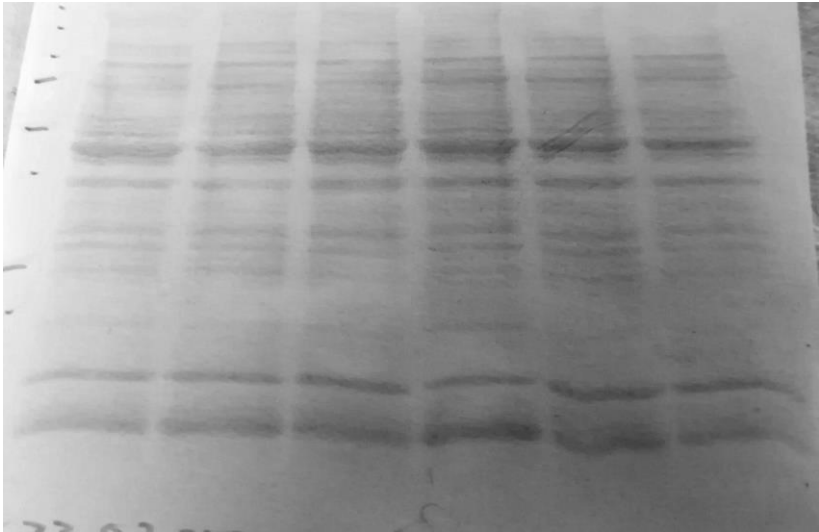

4

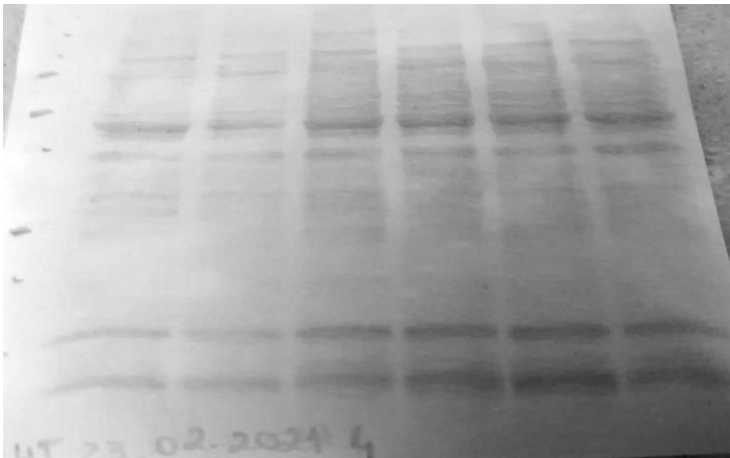

5

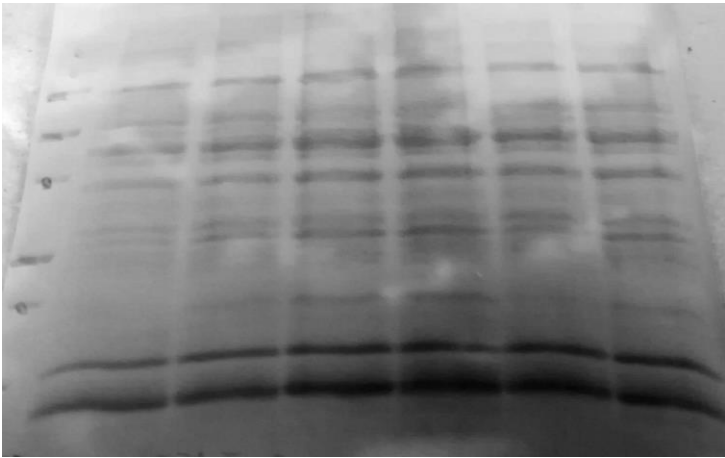

6

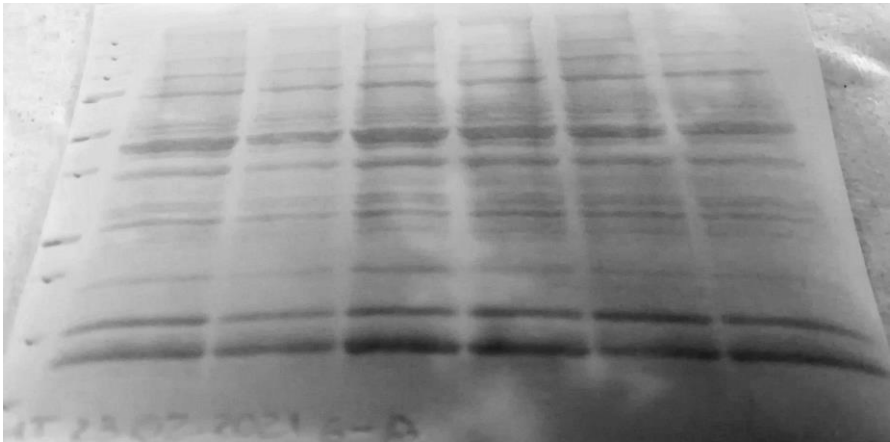

ETFDH - Blot

Samples order from the molecular weight marker: MTX | DOX18 | CTRL | DOX9-1 | CTRL-2 | DOX9-2

This study  
Other study

1

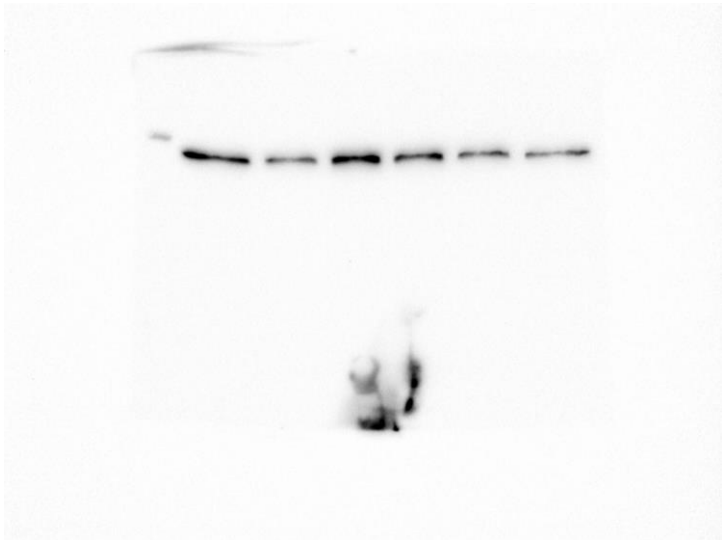

2

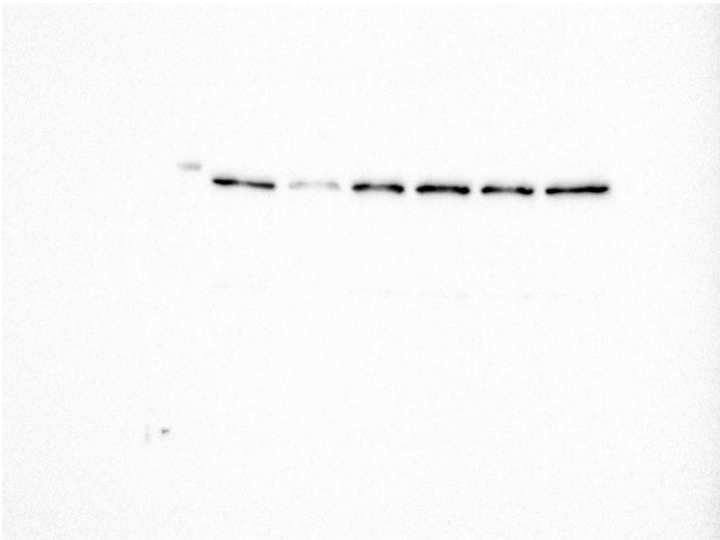

3

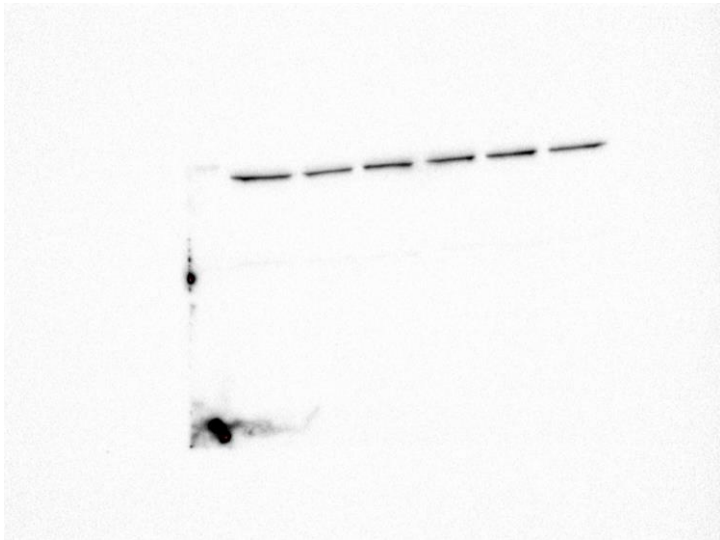

4

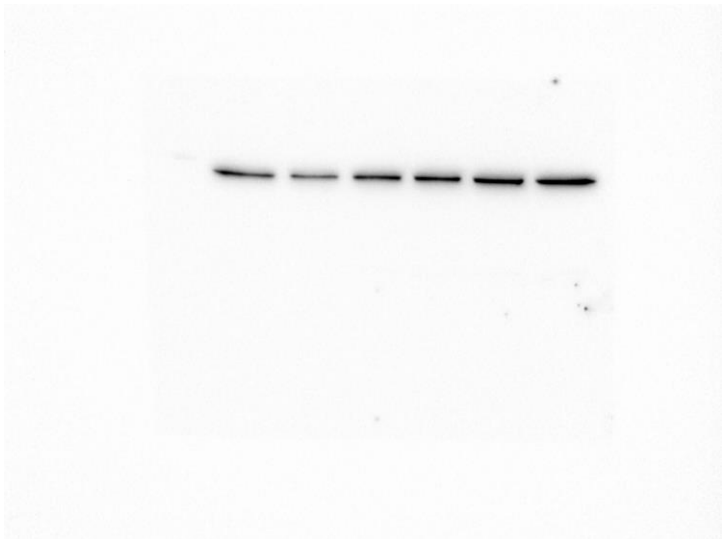

5

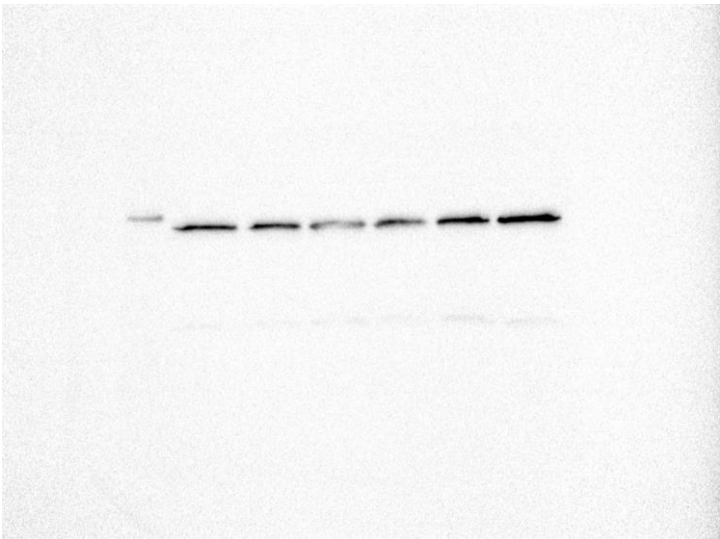

6

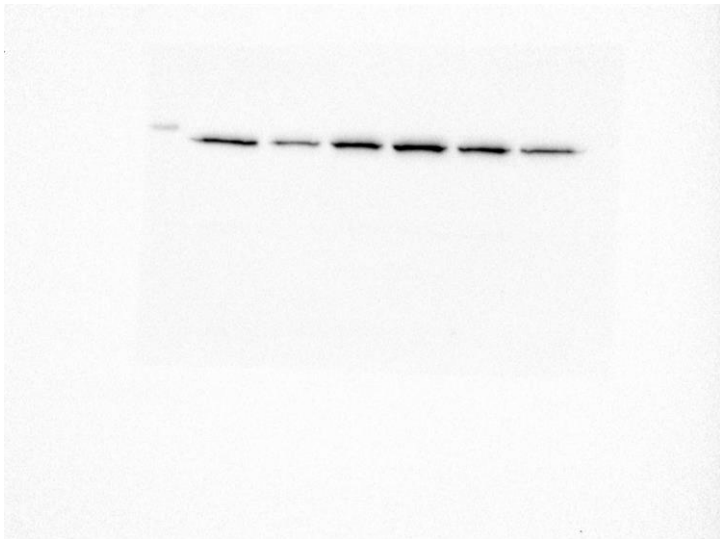



ATPB - Ponceau S

Samples order from the molecular weight marker: MTX | DOX18 | CTRL | DOX9-1 | CTRL-2 | DOX9-2  
Other study

1

2

3

4

5

6

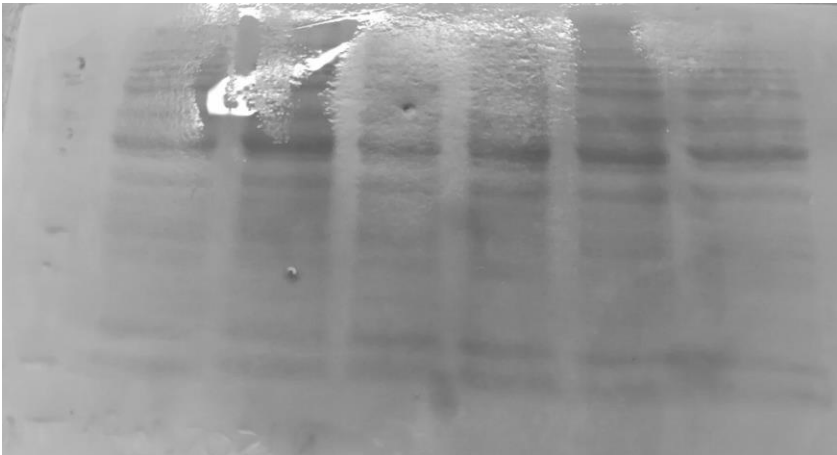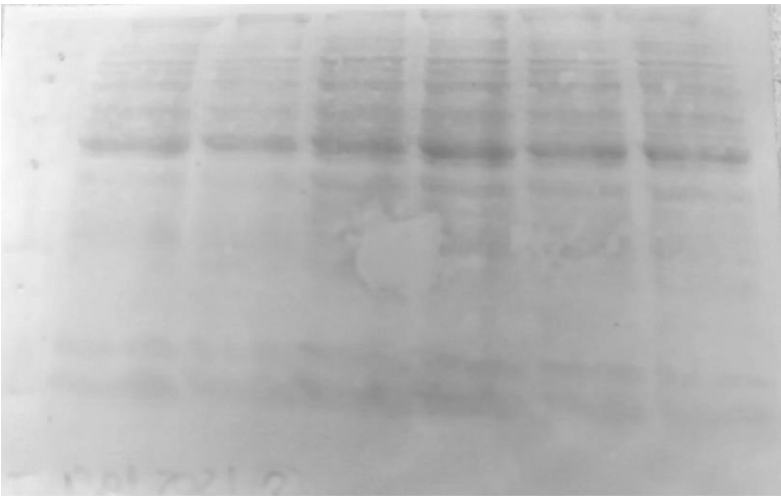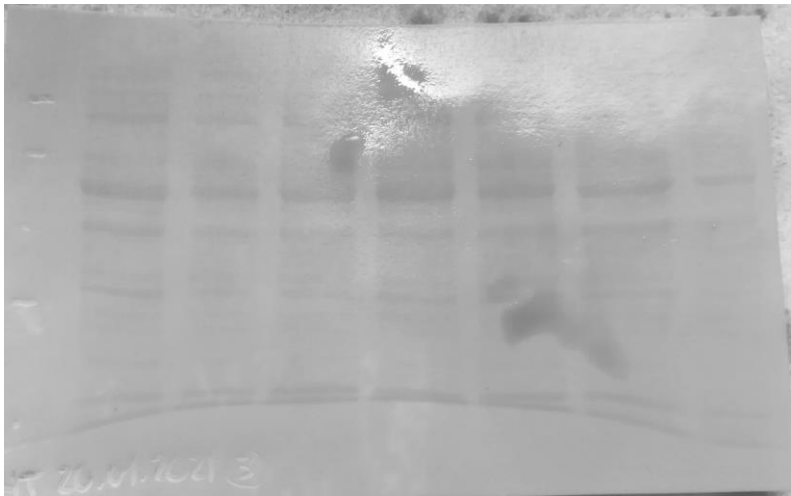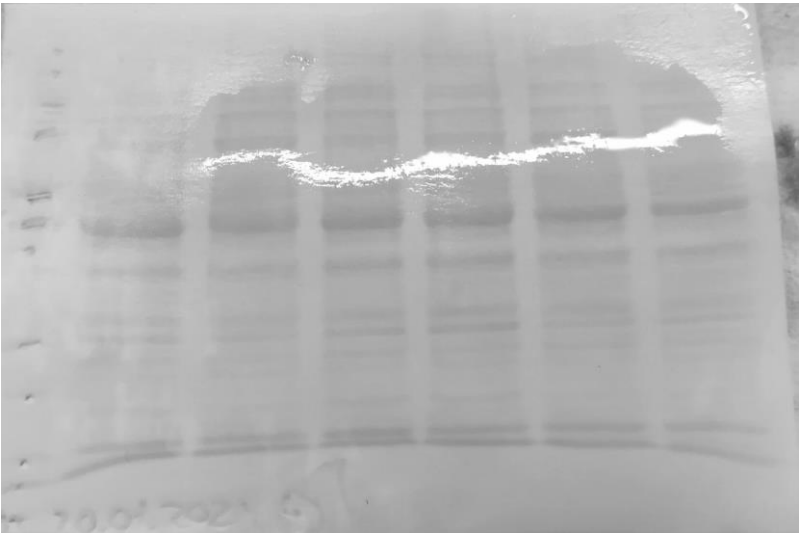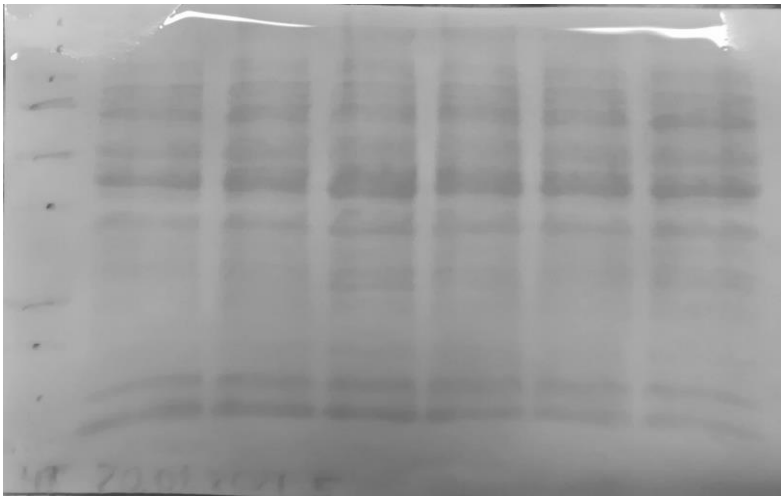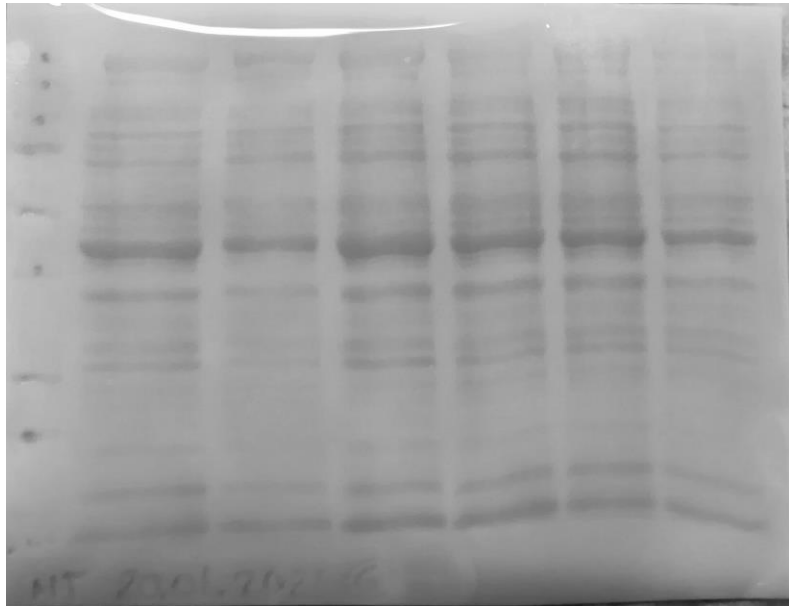

ATPB - Blot

Samples order from the molecular weight marker: **MTX** | **DOX18** | **CTRL** | DOX9-1 | CTRL-2 | DOX9-2

This study

Other study

1

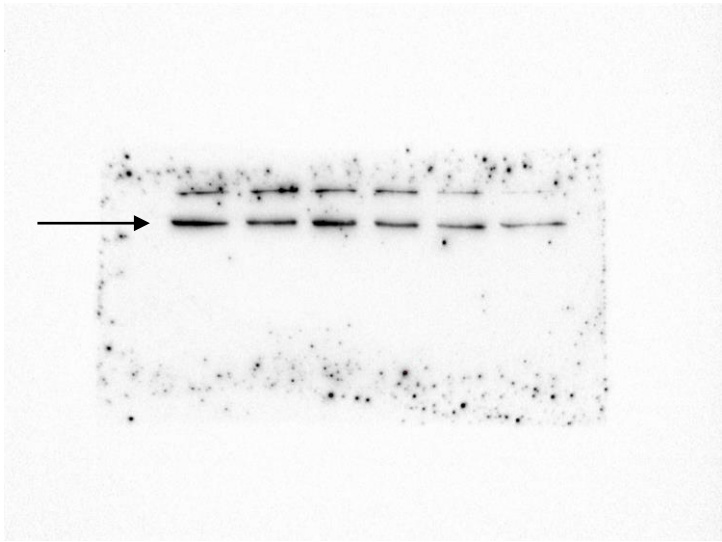

2

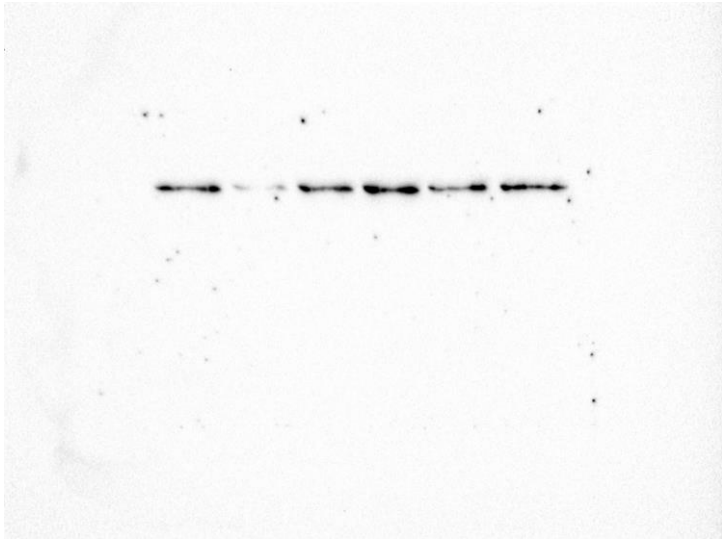

3

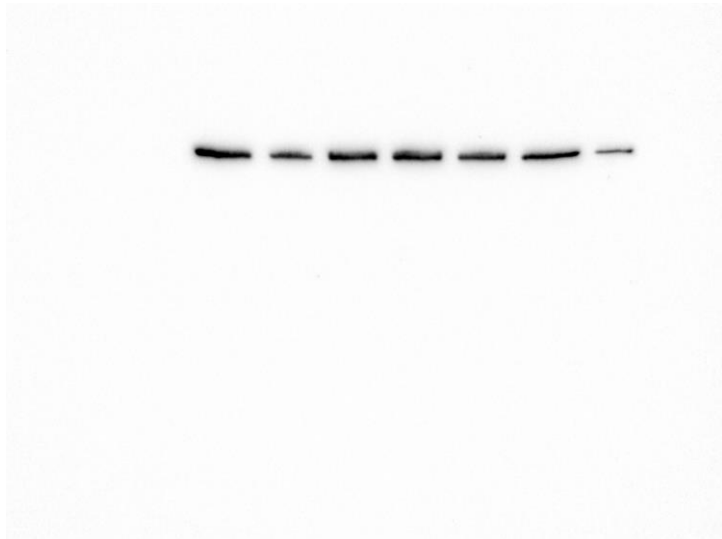

4

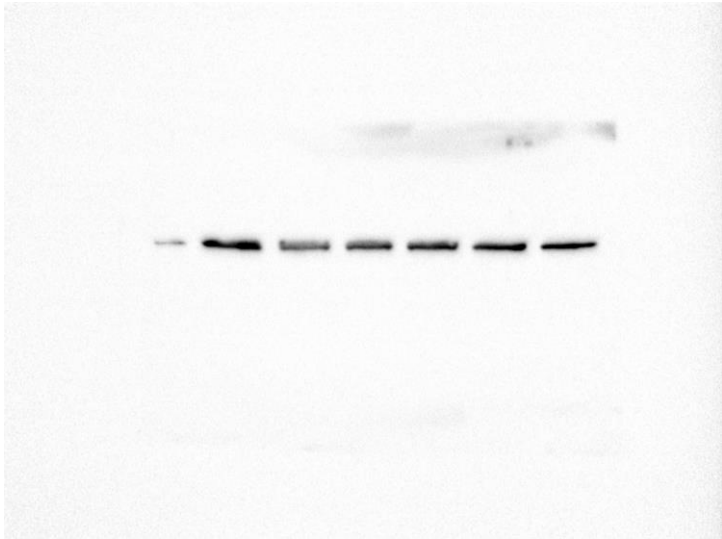

5

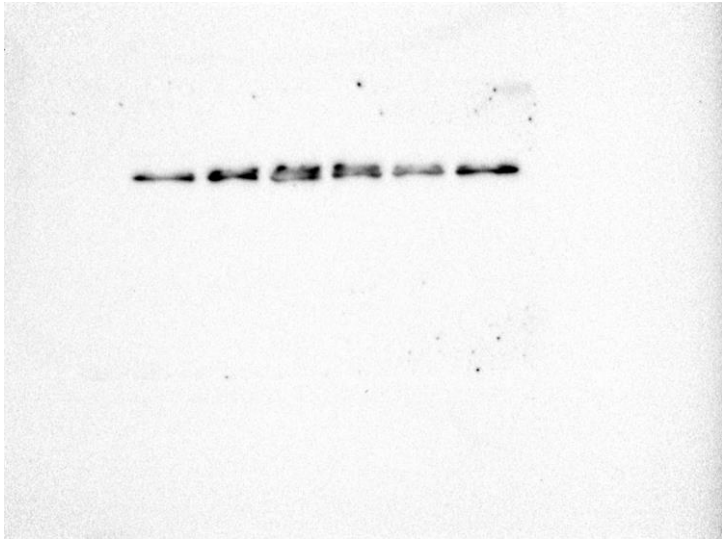

6

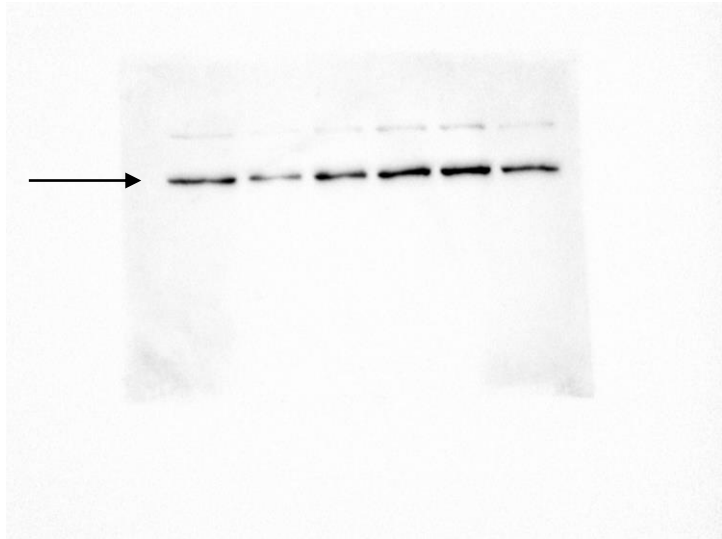

AMPK - Ponceau S

Samples order from the molecular weight marker: MTX | DOX18 | CTRL | DOX9-1 | CTRL-2 | DOX9-2

This study

Other study

1

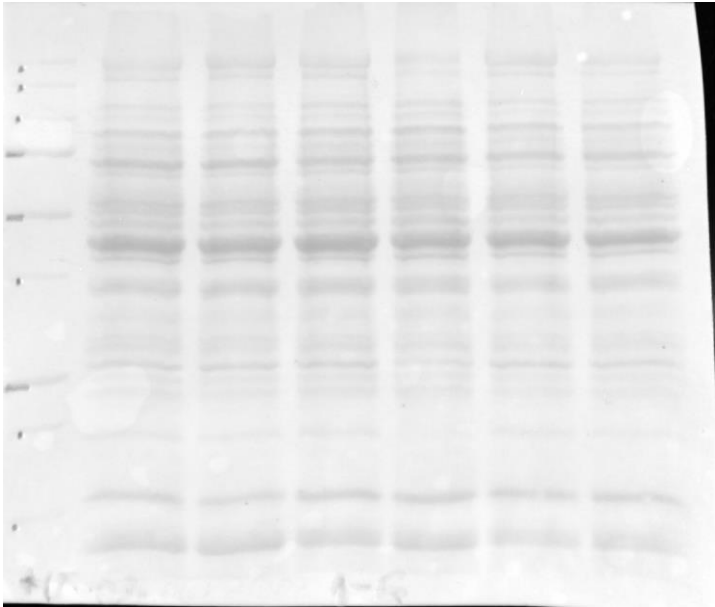

2

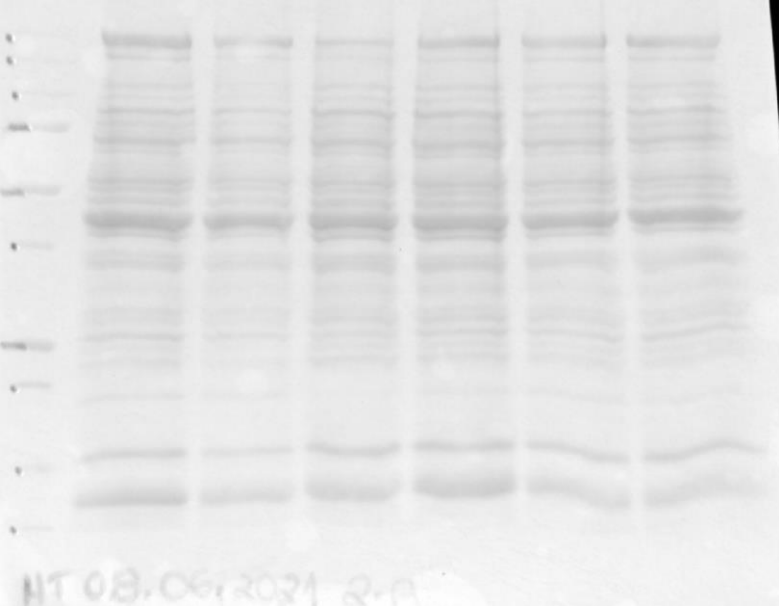

3

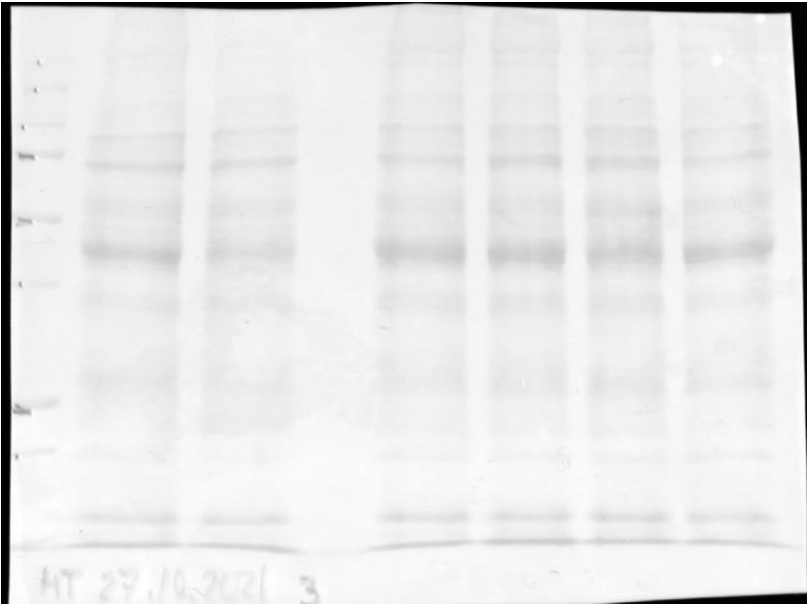

4

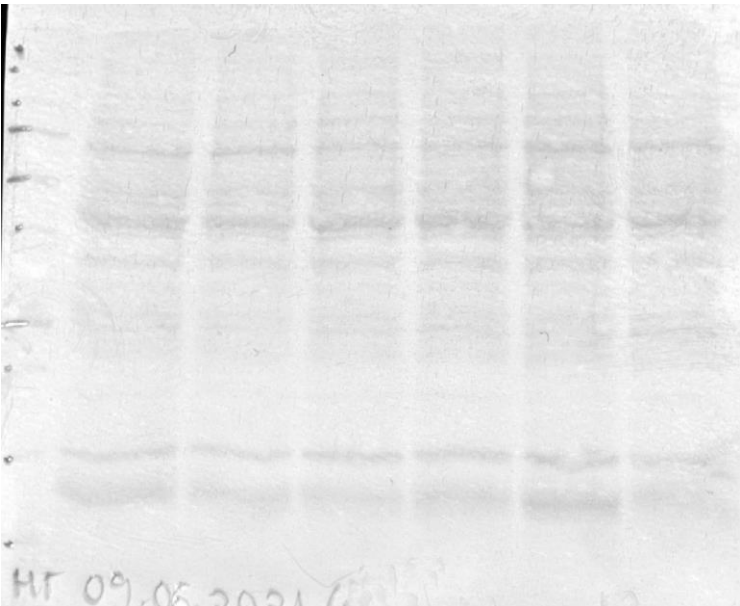

5

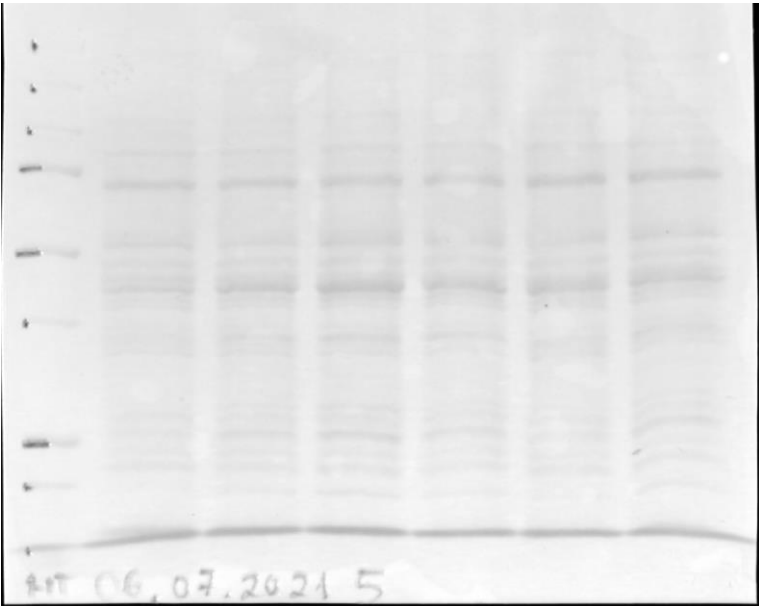

6

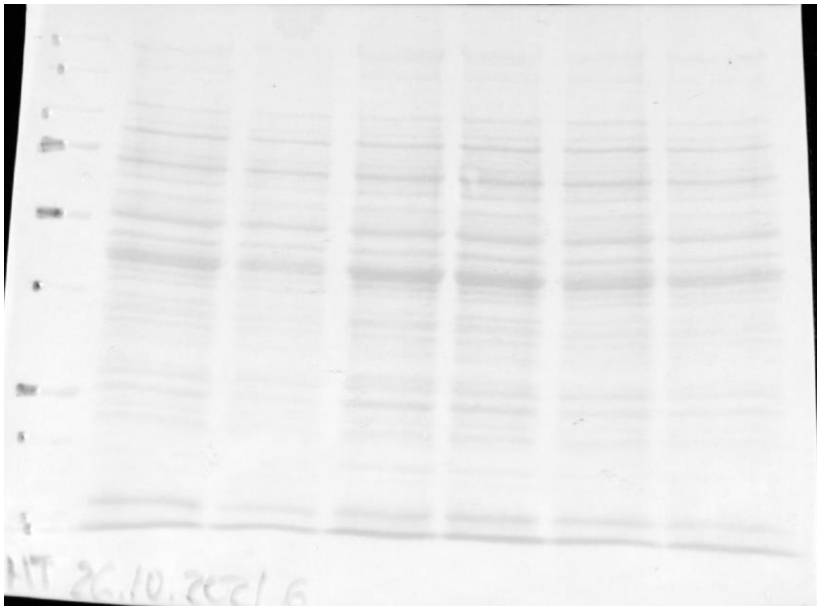



AMPK - Blot

Samples order from the molecular weight marker: MTX | DOX18 | CTRL | DOX9-1 | CTRL-2 | DOX9-2  
Other study

1

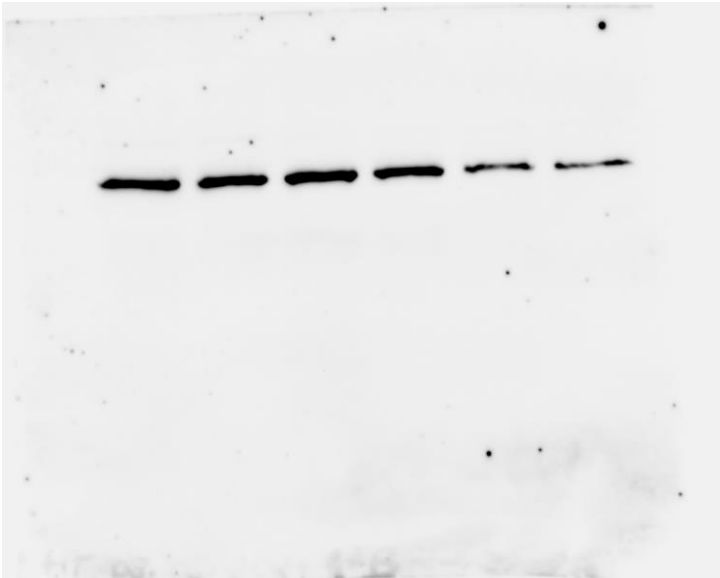

2

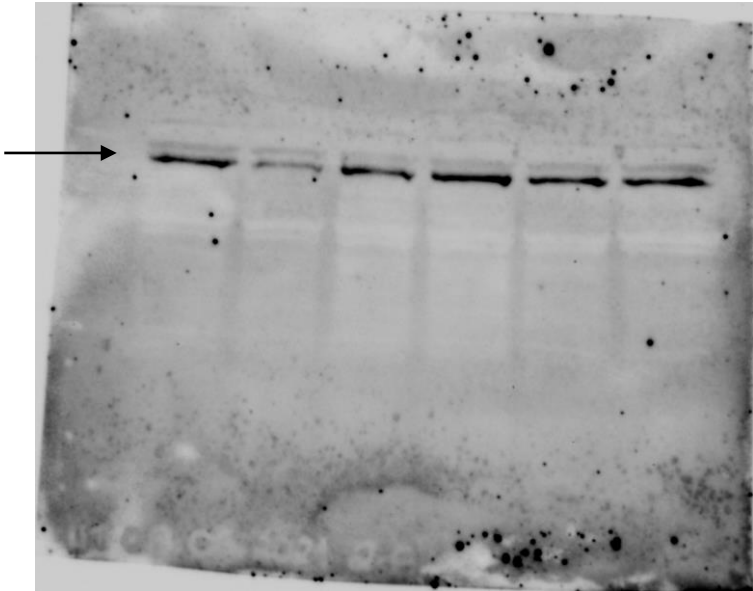

3

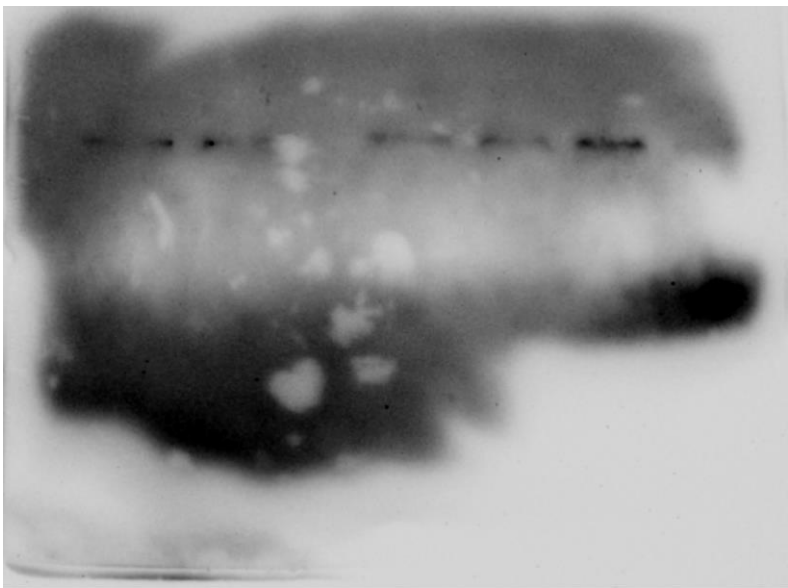

4

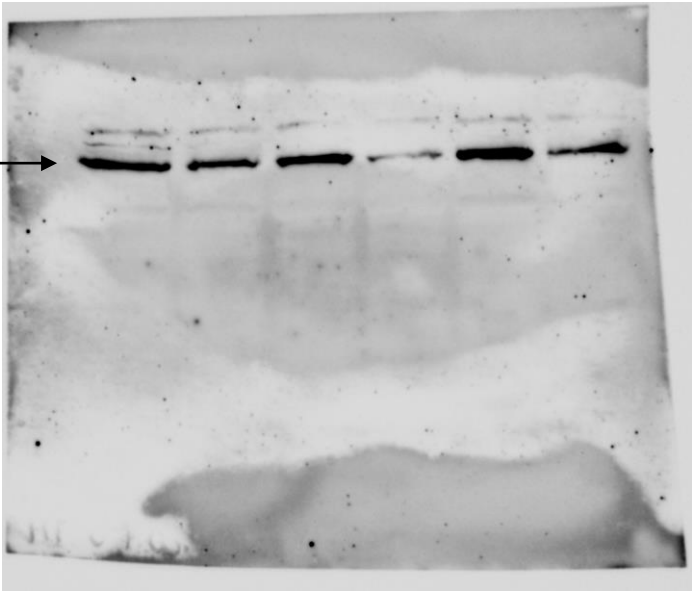

5

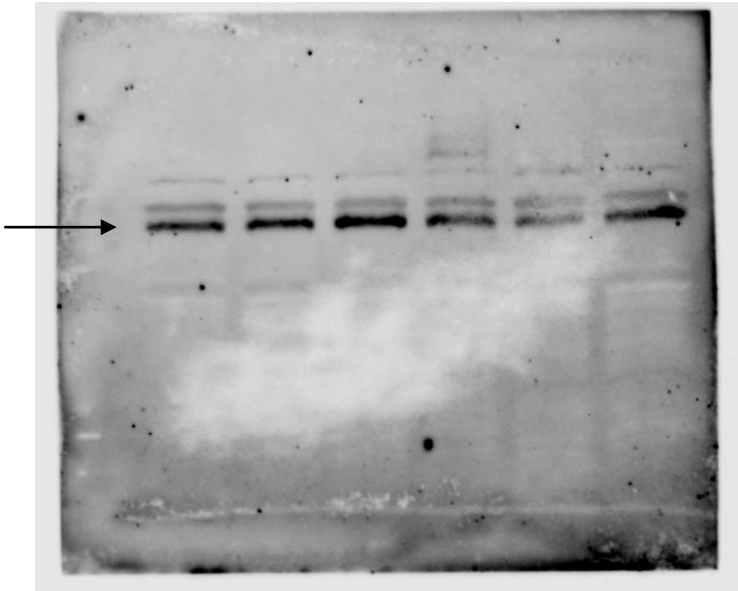

6

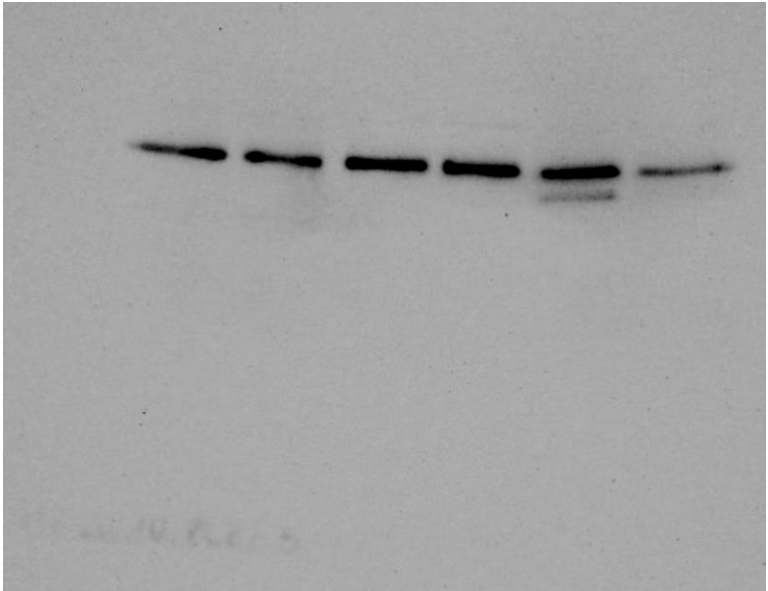

pAMPK - Ponceau S

Samples order from the molecular weight marker: **MTX** | **DOX18** | **CTRL** | DOX9-1 | CTRL-2 | DOX9-2

This study

Other study

1

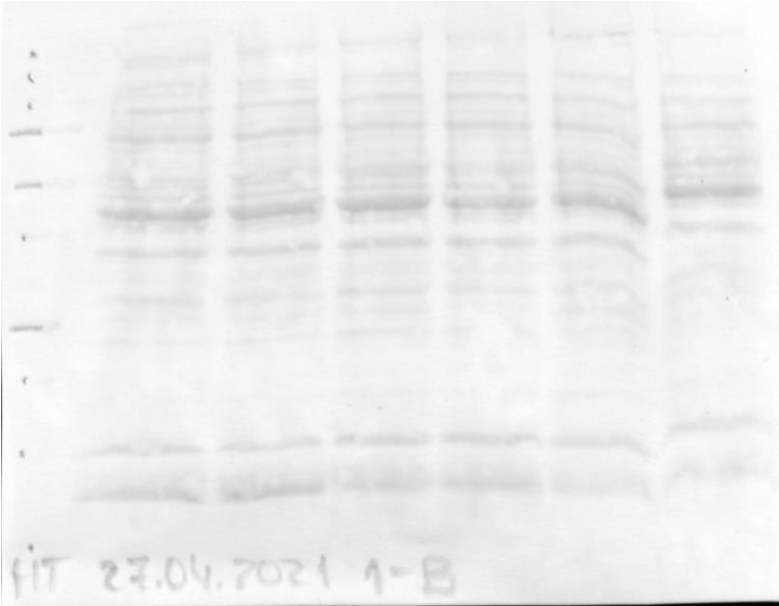

2

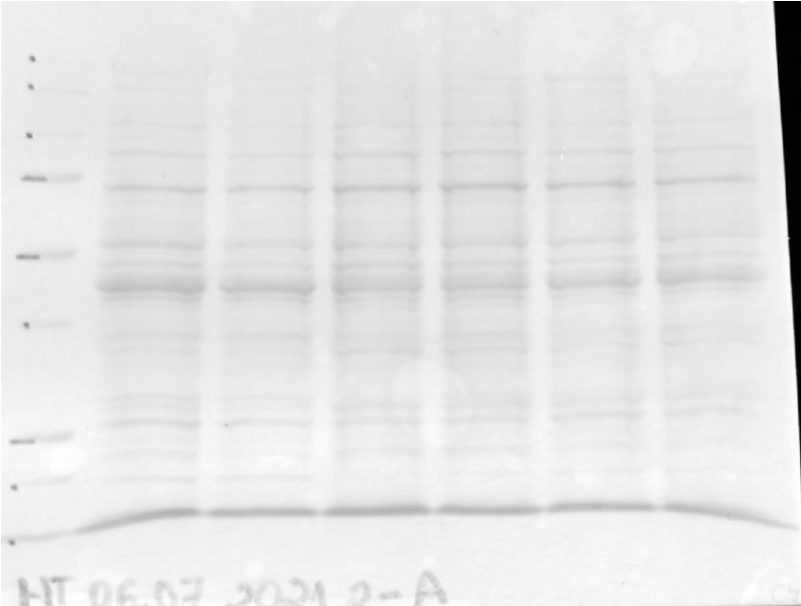

3

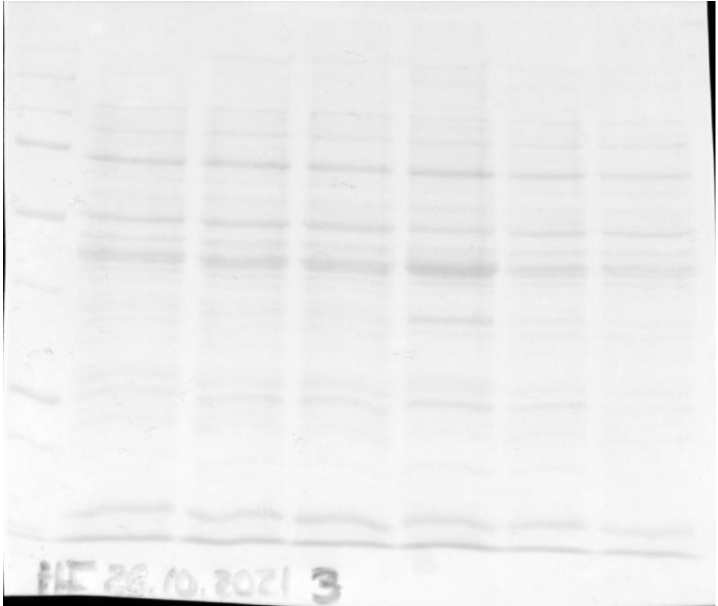

4

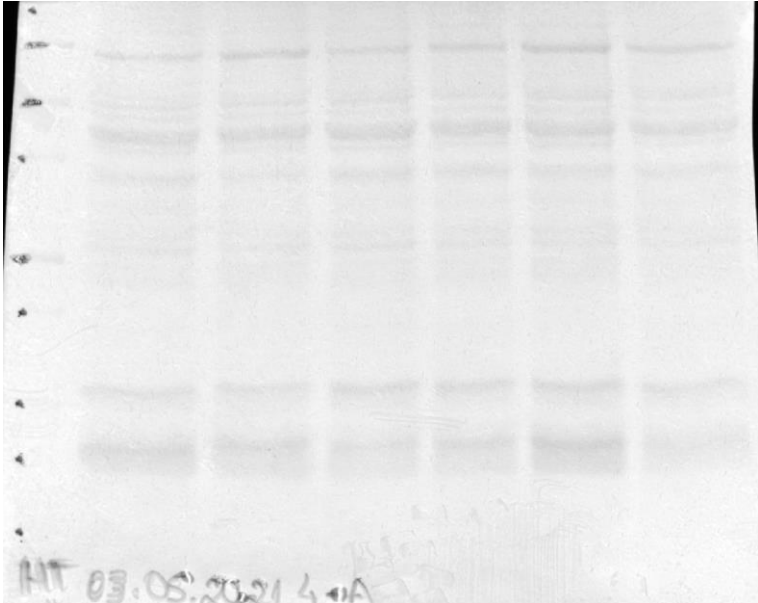

5

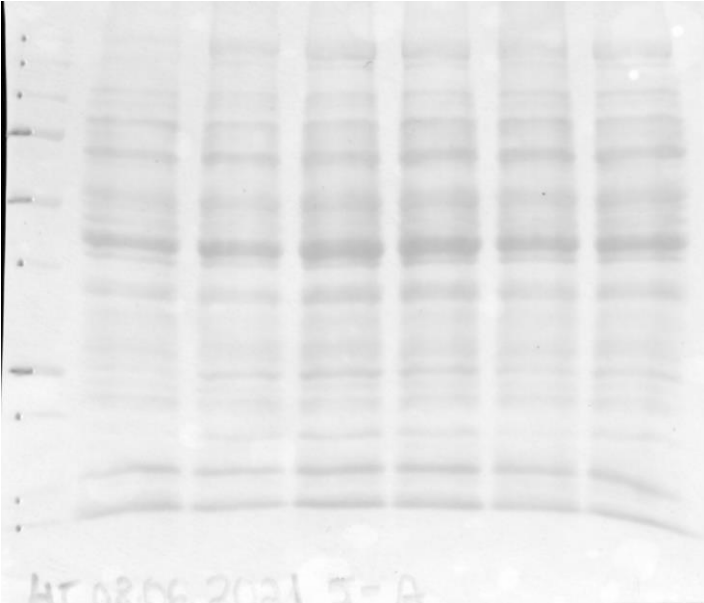

6

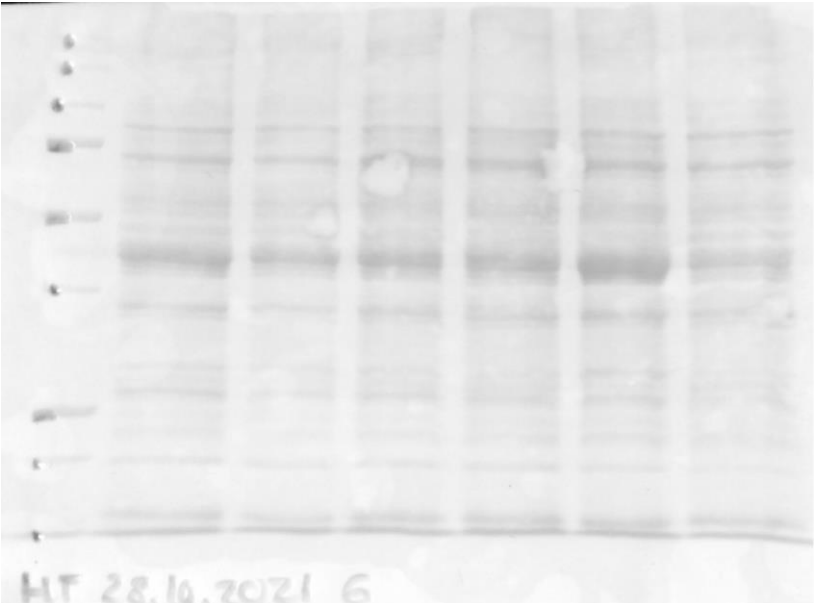

pAMPK - Blot

Samples order from the molecular weight marker: **MTX** | **DOX18** | **CTRL** | DOX9-1 | CTRL-2 | DOX9-2

This study

Other study

1

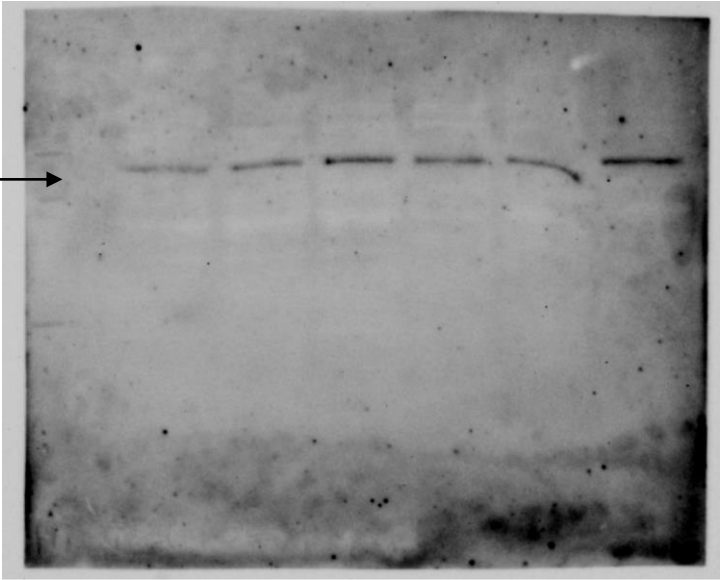

2

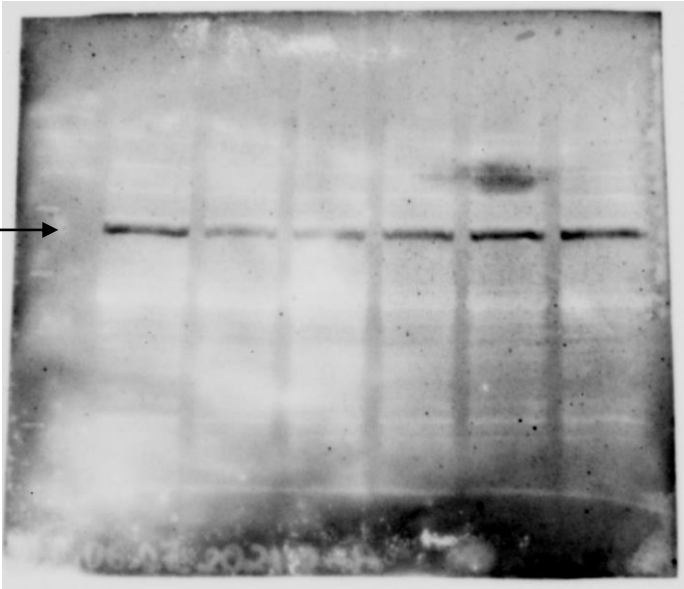

3

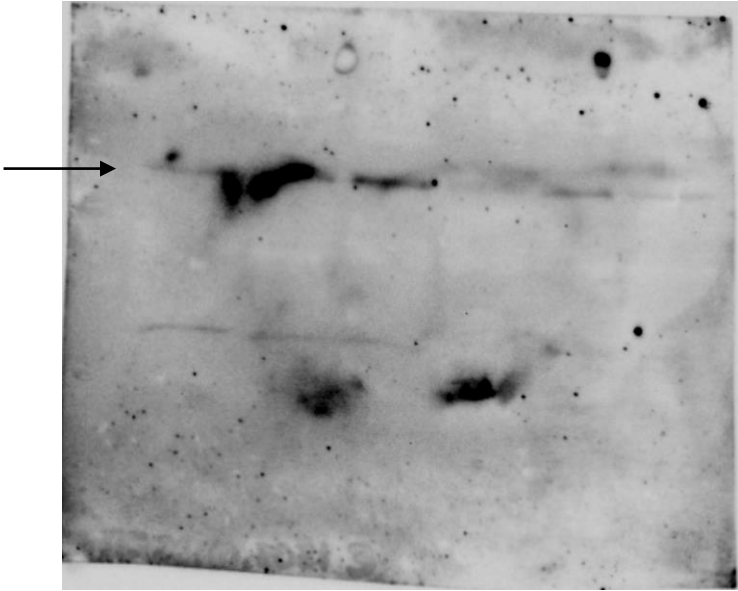

4

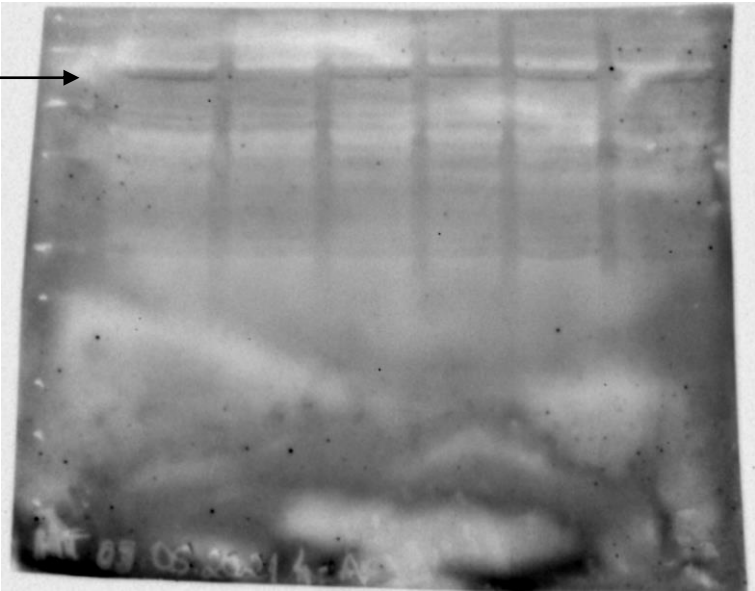

5

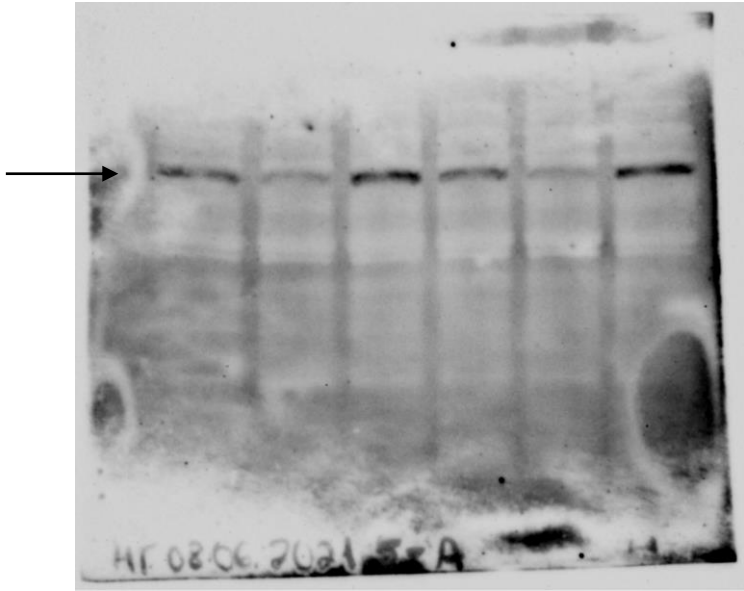

6

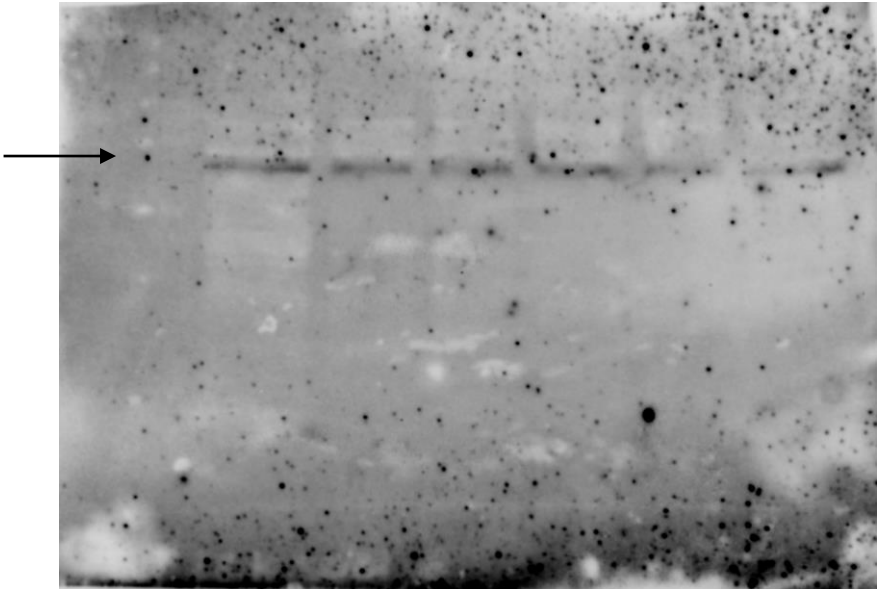



PPARα - Ponceau S

Samples order from the molecular weight marker: **MTX** | **DOX18** | **CTRL** | DOX9-1 | CTRL-2 | DOX9-2

This study

Other study

1

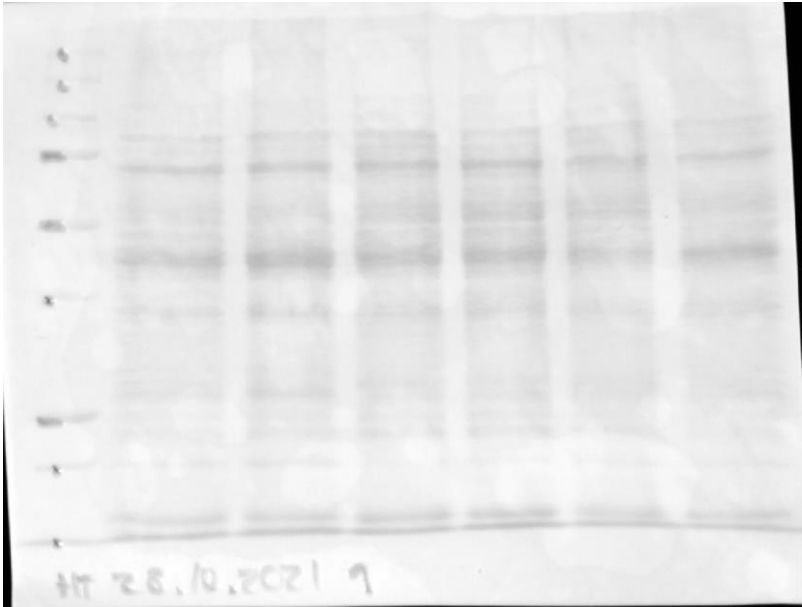

2

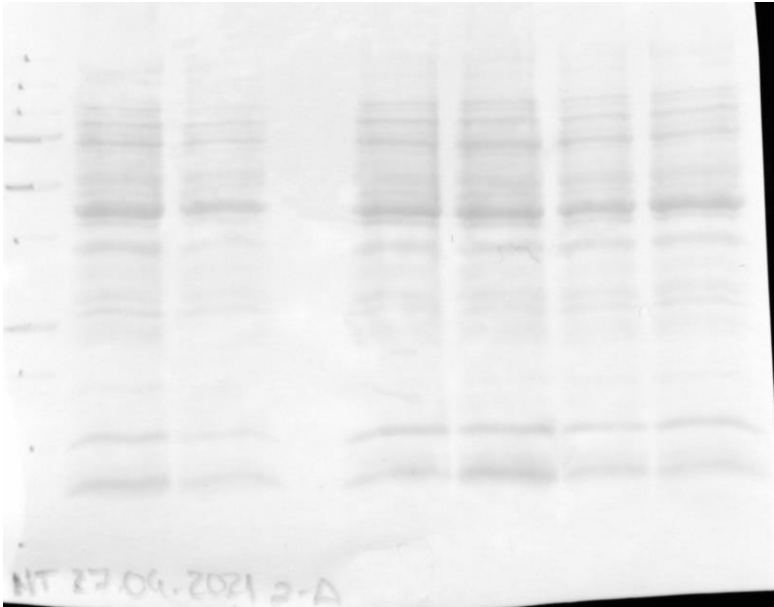

3

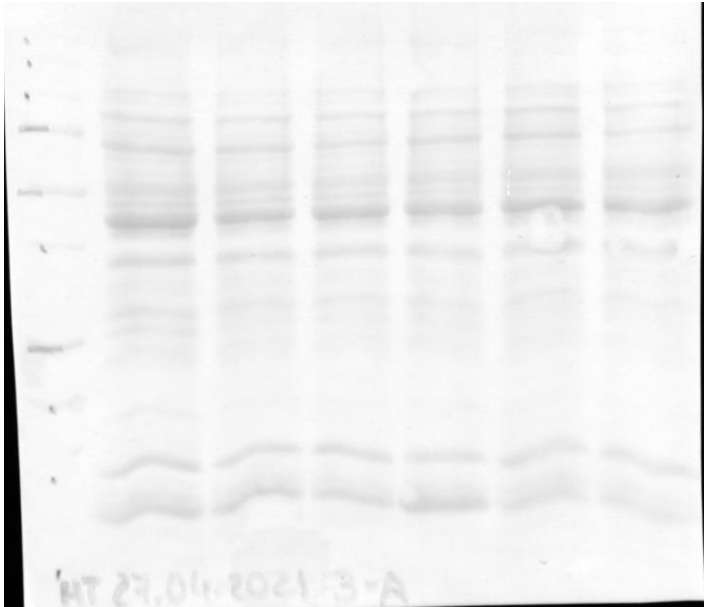

4

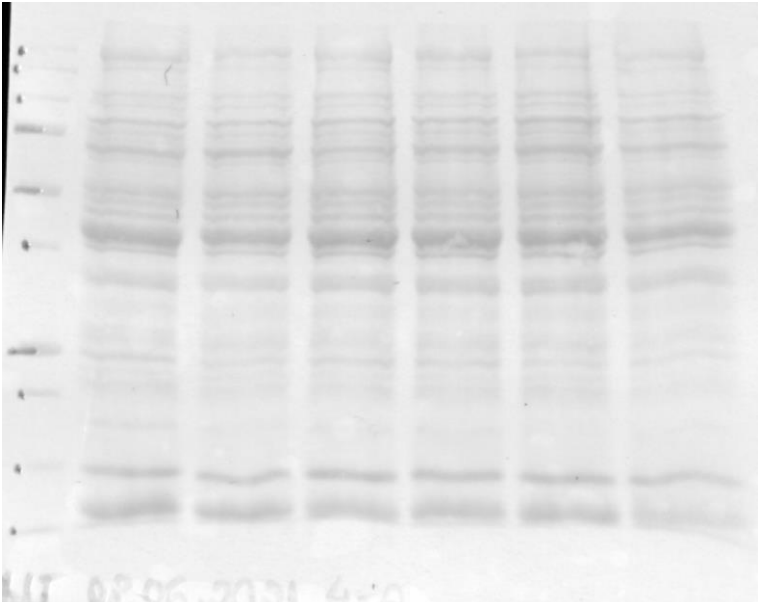

5

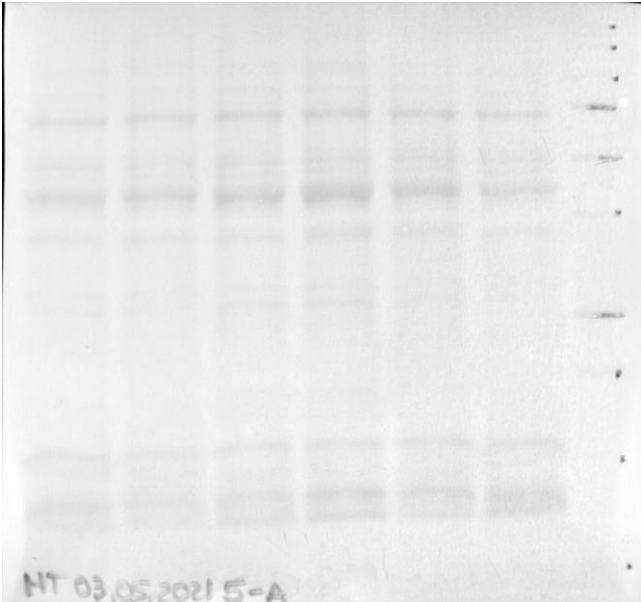

6

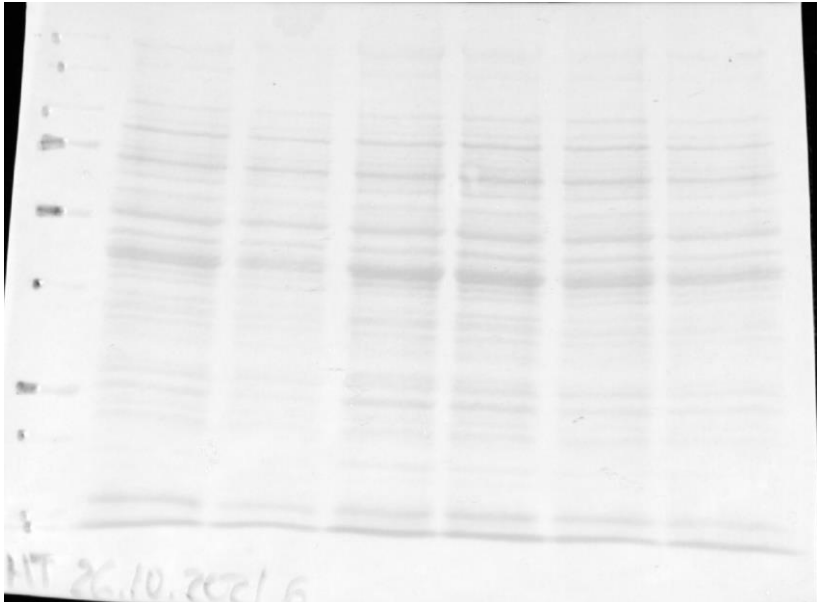

PPARα - Blot

Samples order from the molecular weight marker: **MTX** | **DOX18** | **CTRL** | DOX9-1 | CTRL-2 | DOX9-2

This study

Other study

1

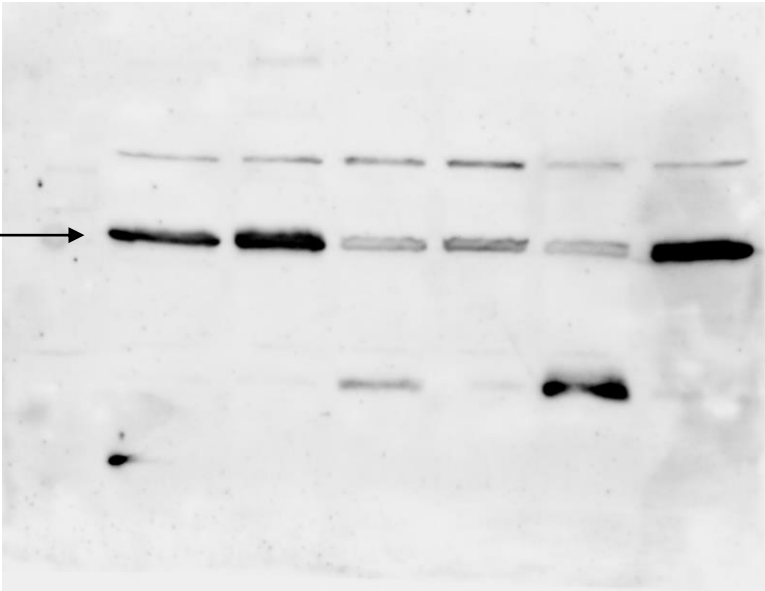

2

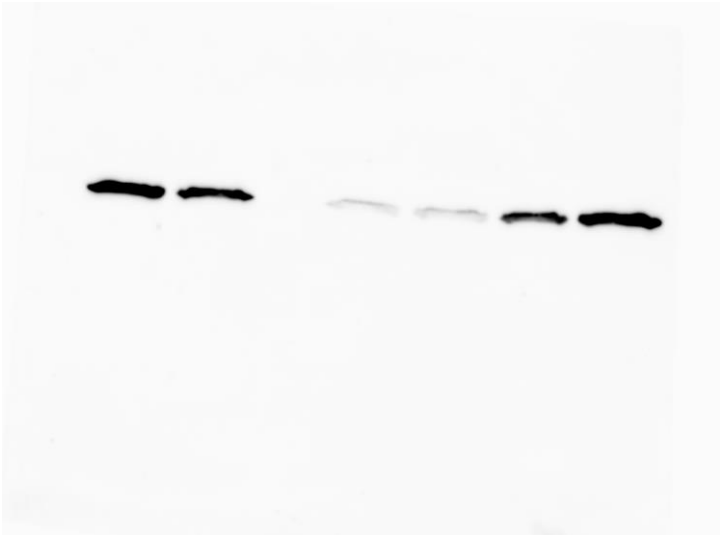

3

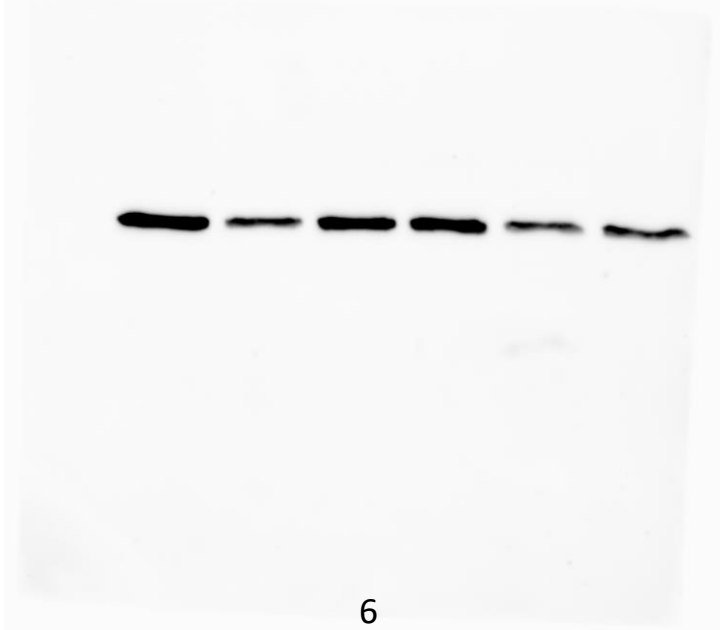

4

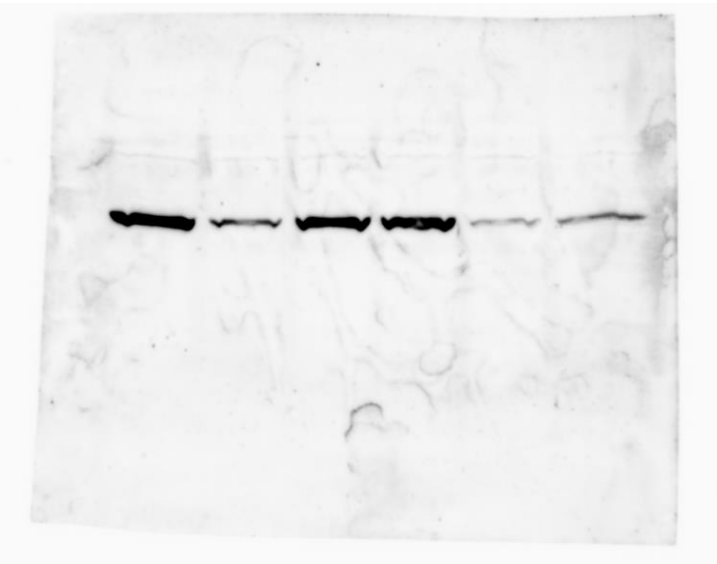

5

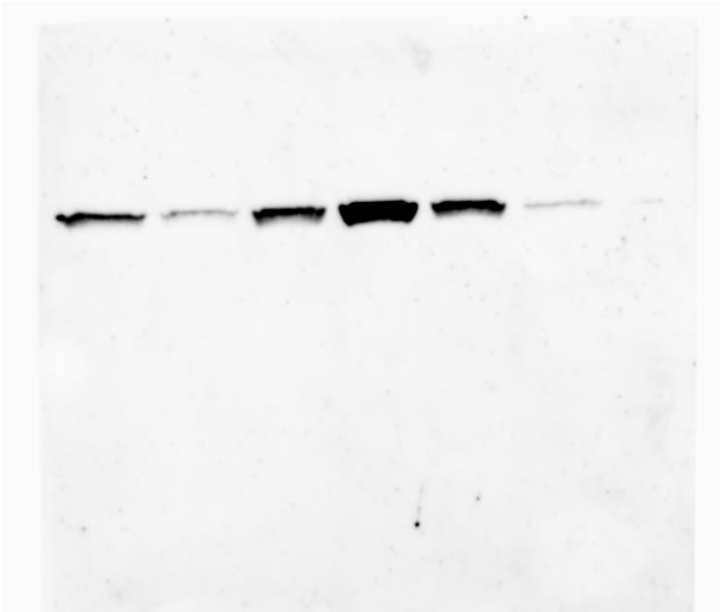

6

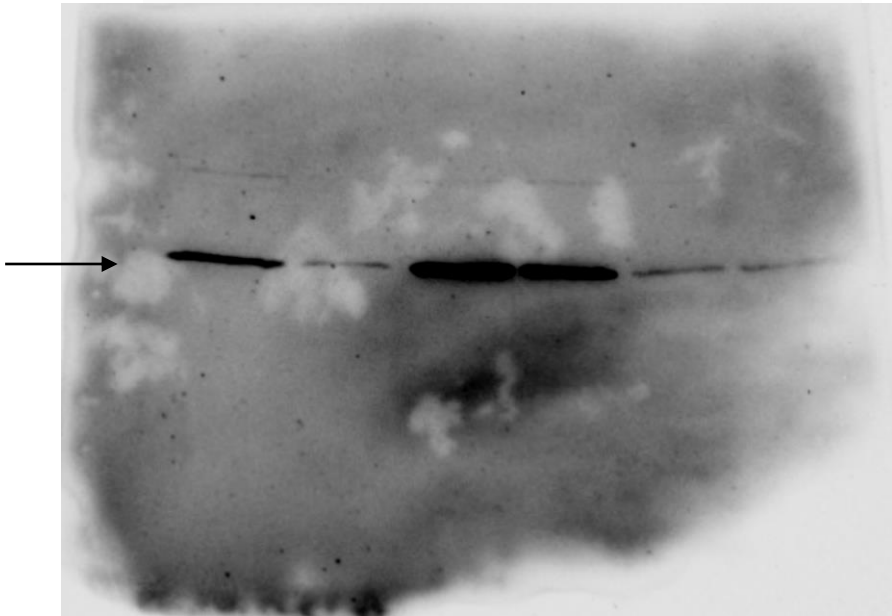

PPAR $\gamma$  - Ponceau S

Samples order from the molecular weight marker: **MTX** | **DOX18** | **CTRL** | DOX9-1 | CTRL-2 | DOX9-2

This study

DOX9-1 | CTRL-2 | DOX9-2

Other study  
3

1

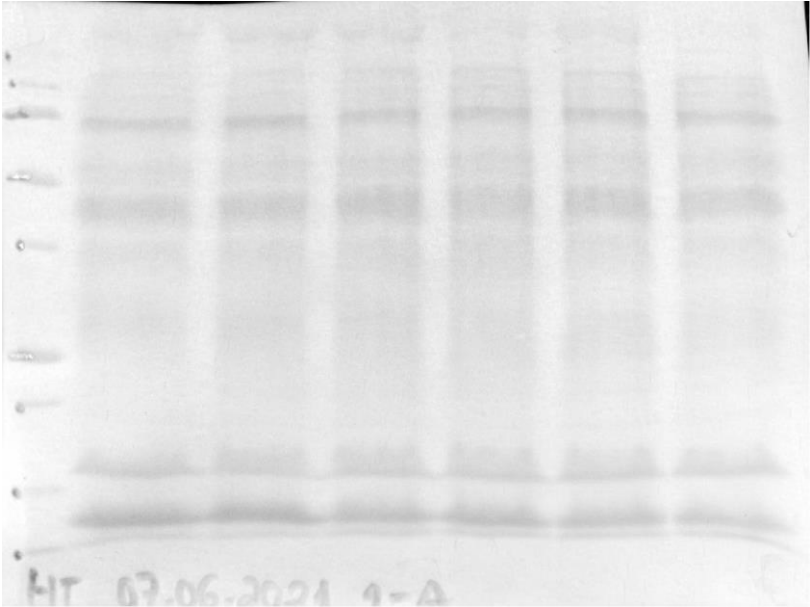

2

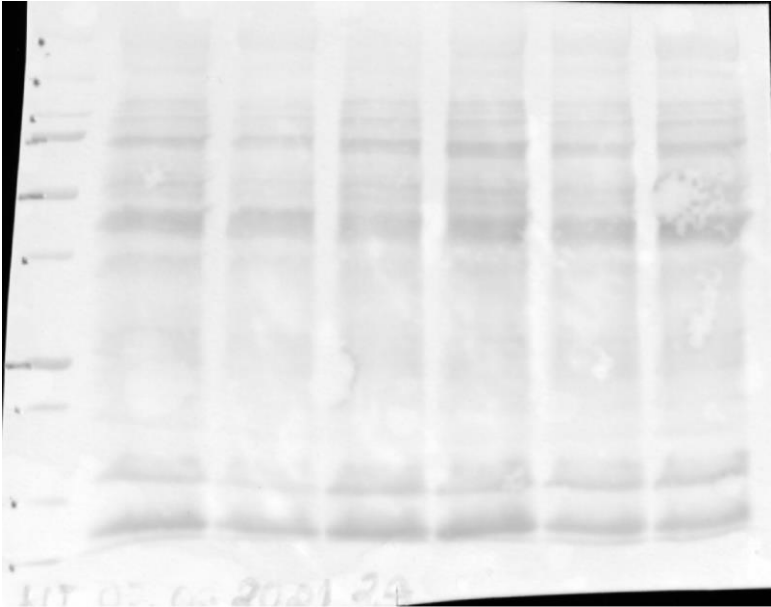

6

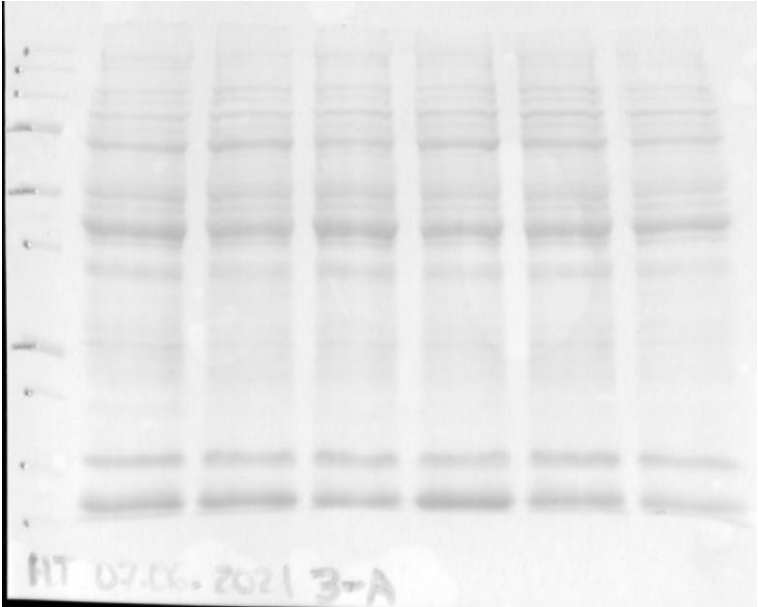

4

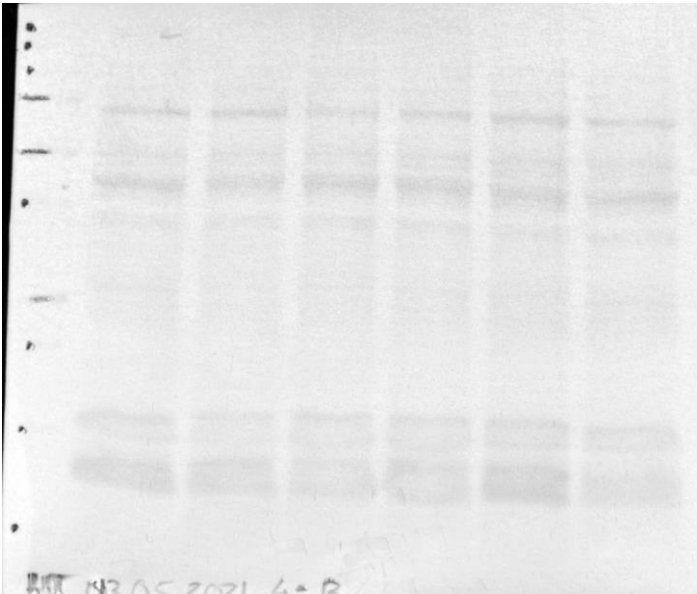

5

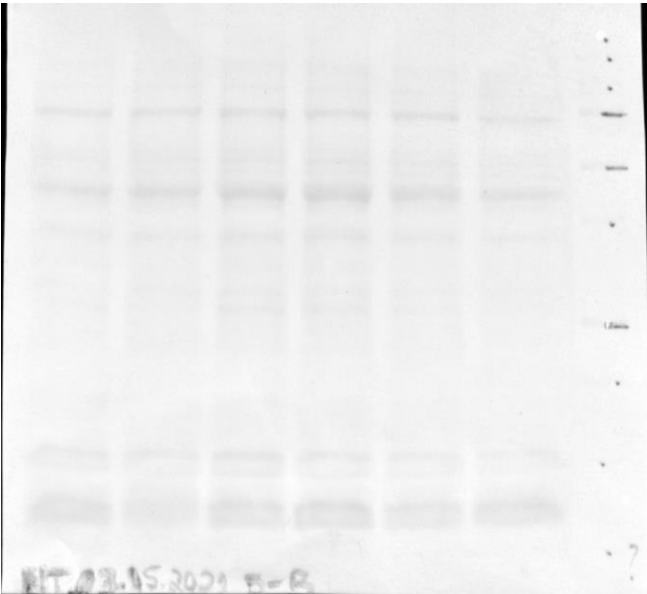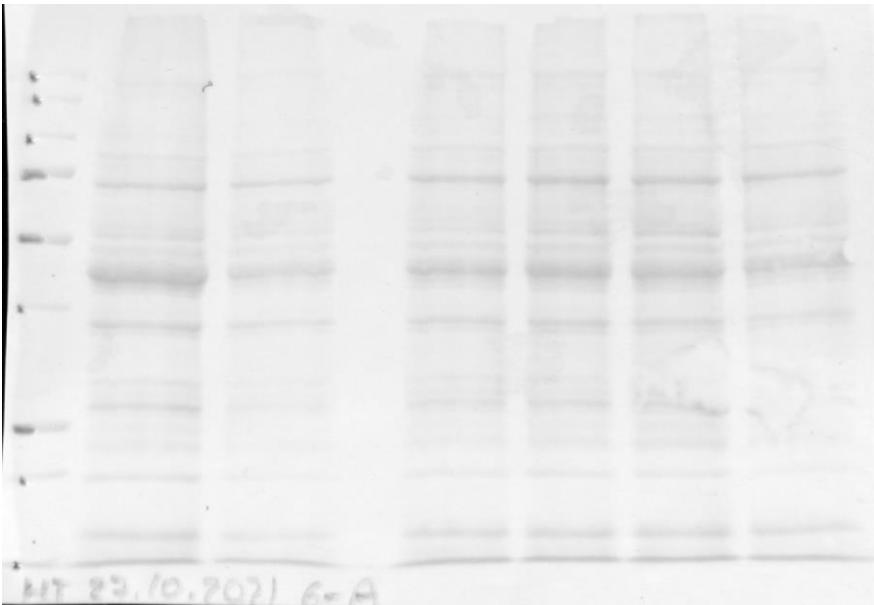



PPAR $\gamma$  - Blot

Samples order from the molecular weight marker: **MTX** | **DOX18** | **CTRL** | DOX9-1 | CTRL-2 | DOX9-2

This study

Other study

1

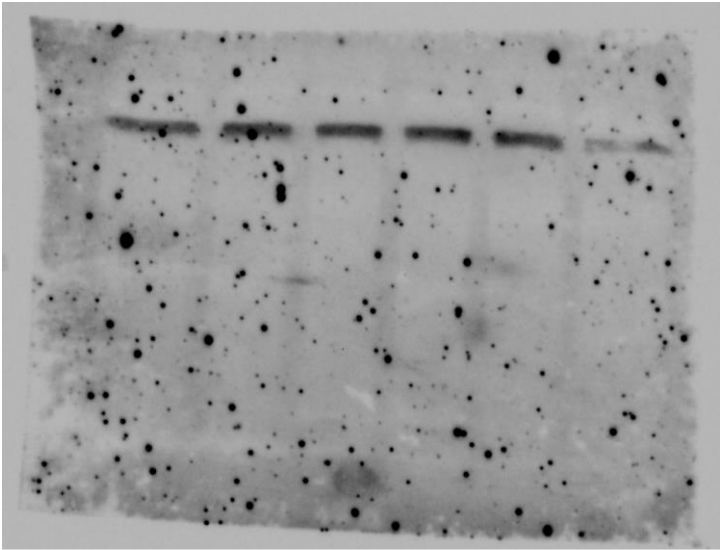

2

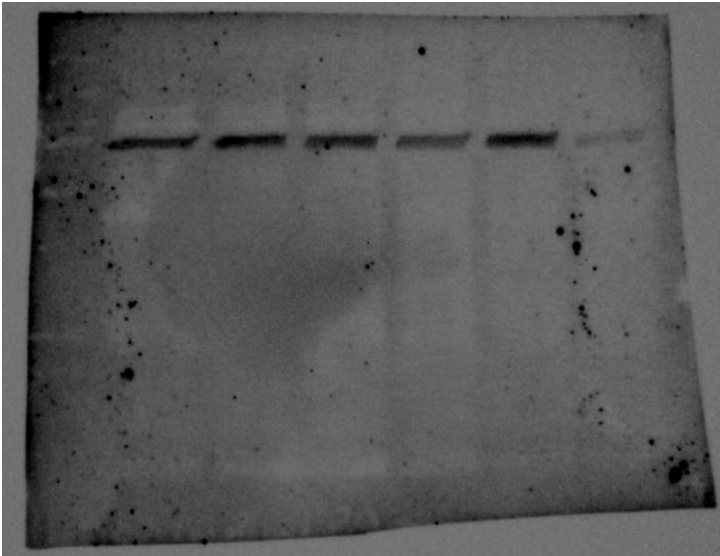

3

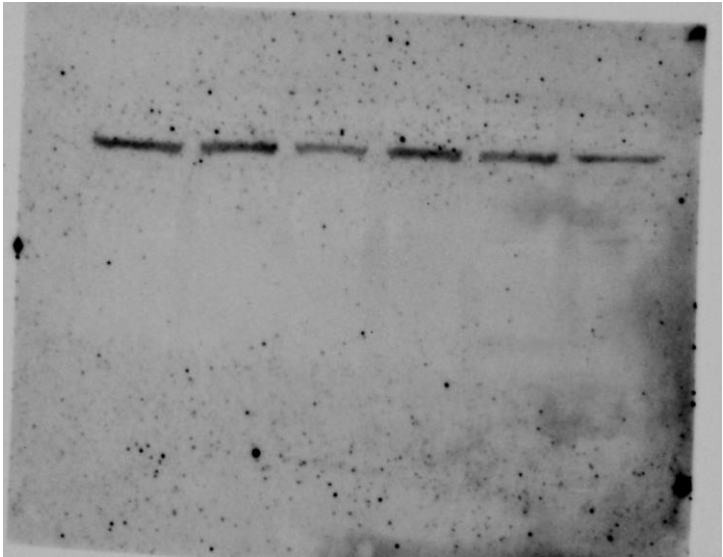

4

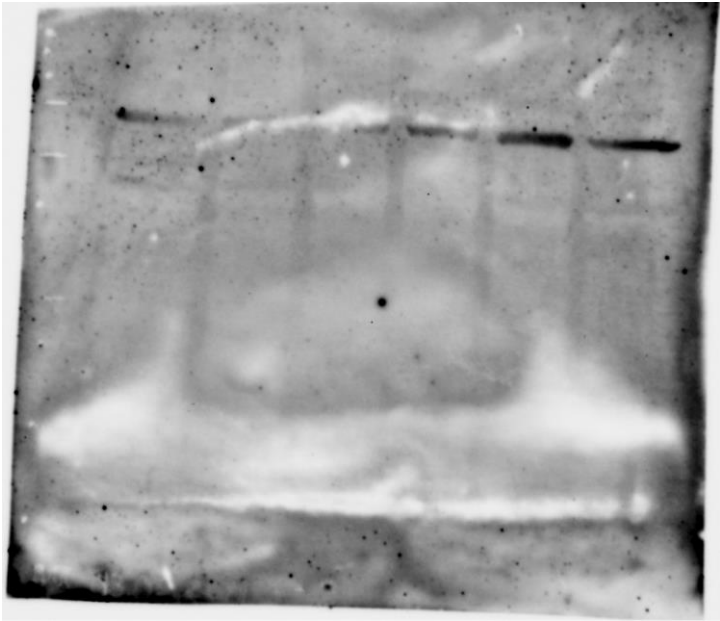

5

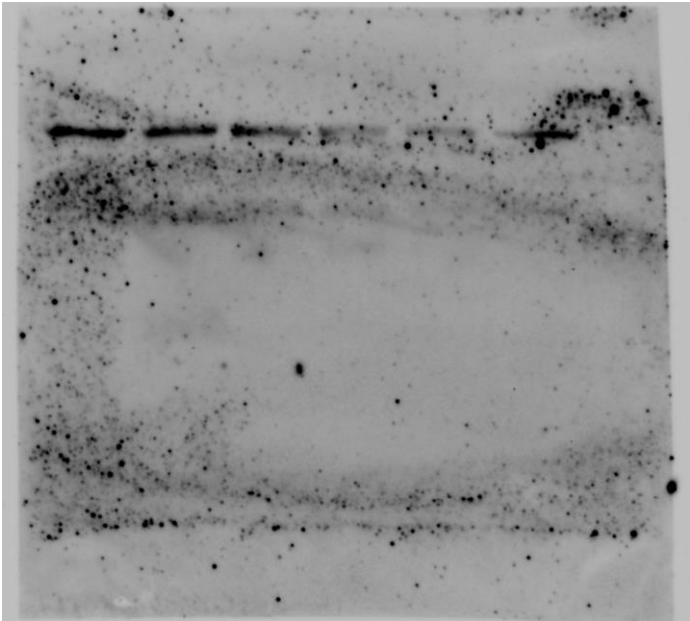

6

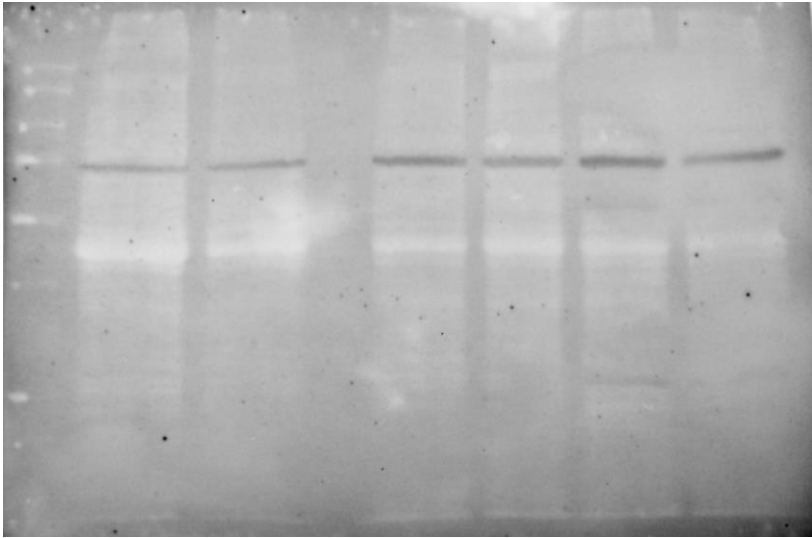

GSK-3β - Ponceau S

Samples order from the molecular weight marker: This study MTX | DOX18 | CTRL | DOX9-1 | CTRL-2 | DOX9-2

Other study  
3

1

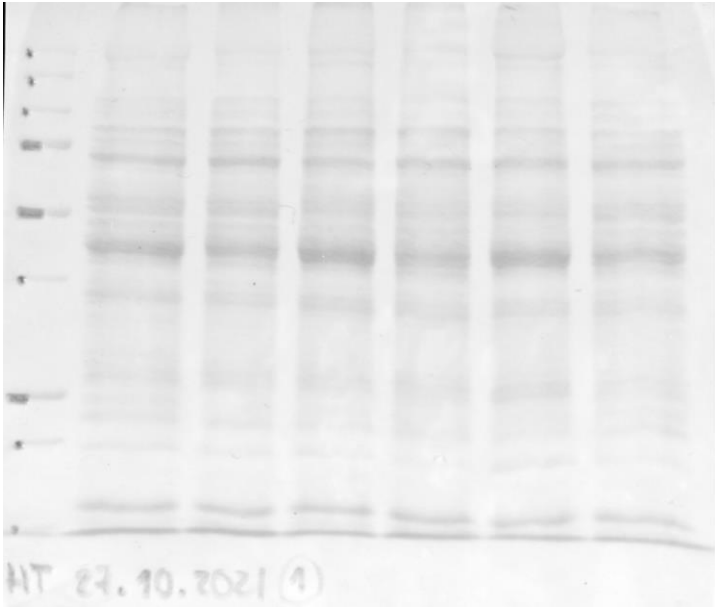

2

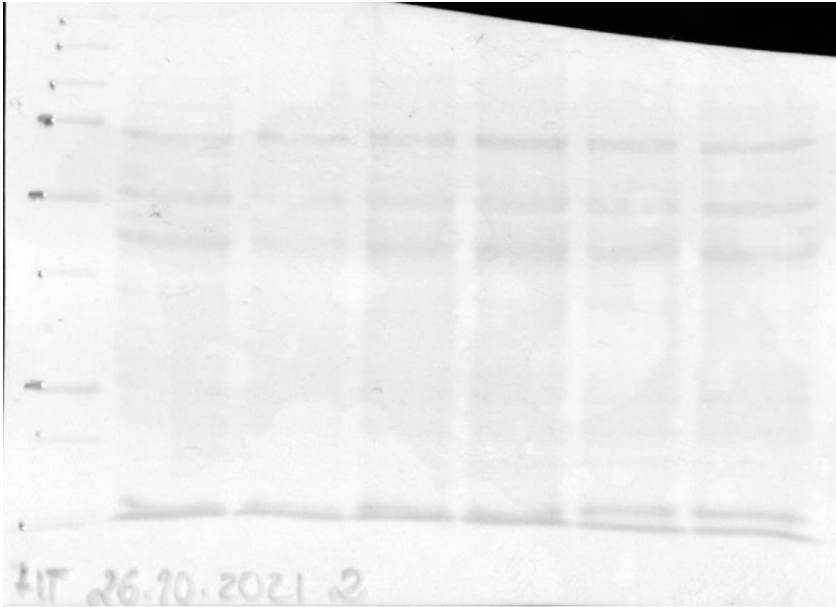

6

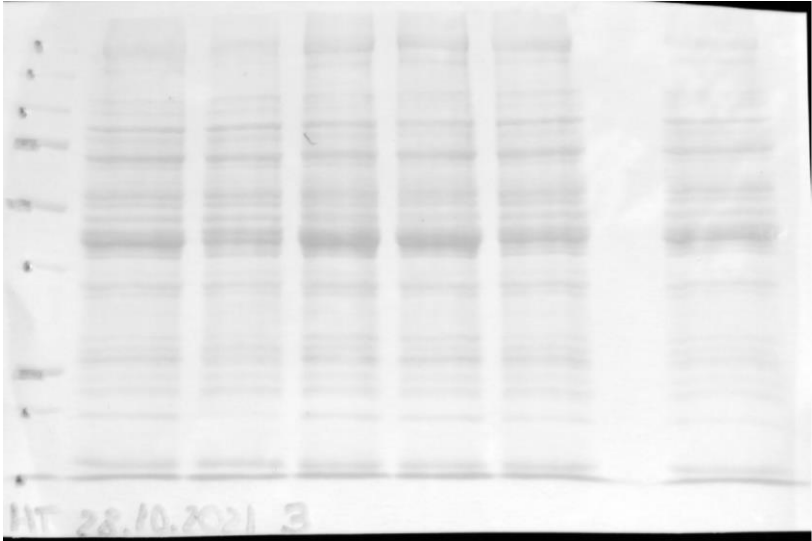

4

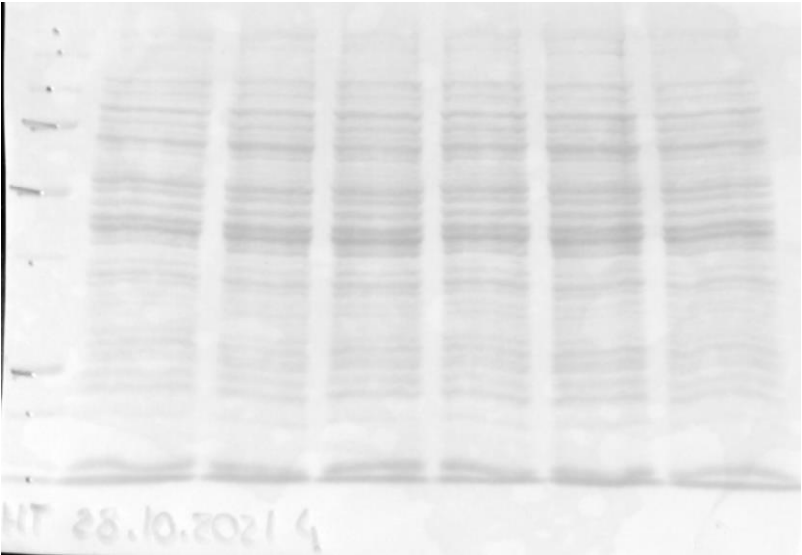

5

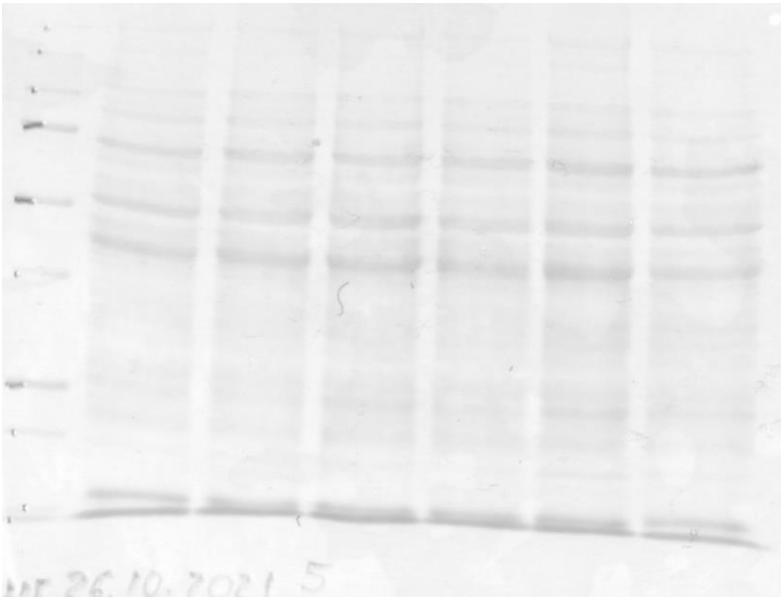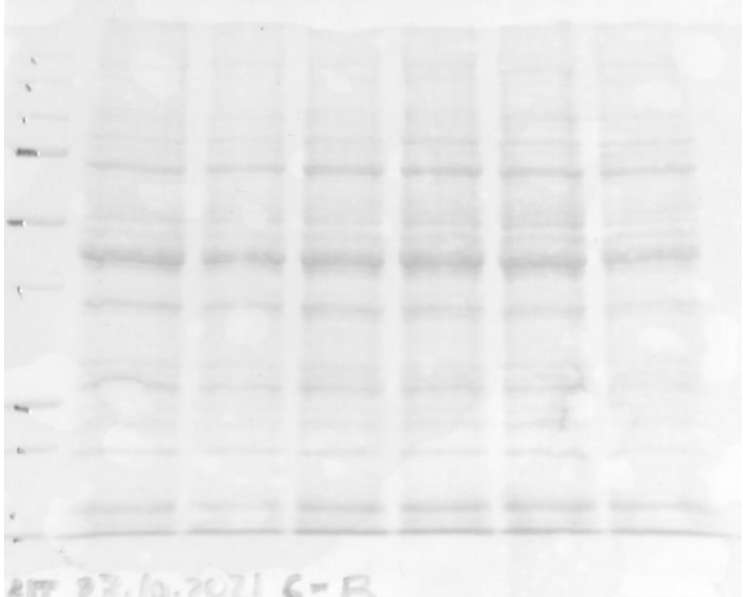

GSK-3β - Blot

Samples order from the molecular weight marker: **MTX** | **DOX18** | **CTRL** | DOX9-1 | CTRL-2 | DOX9-2

This study

Other study

1

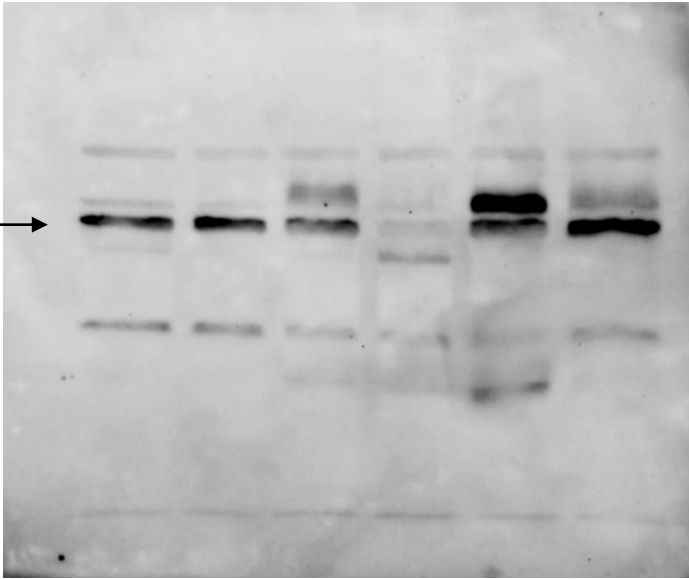

2

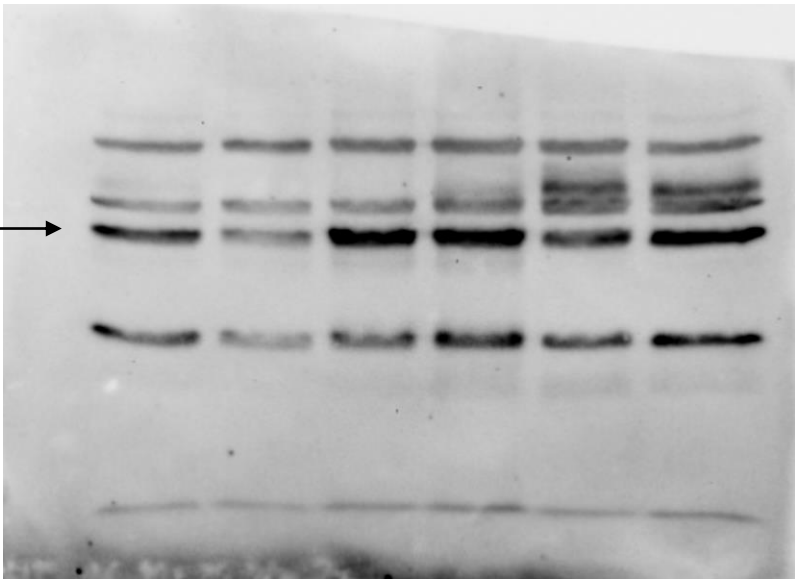

3

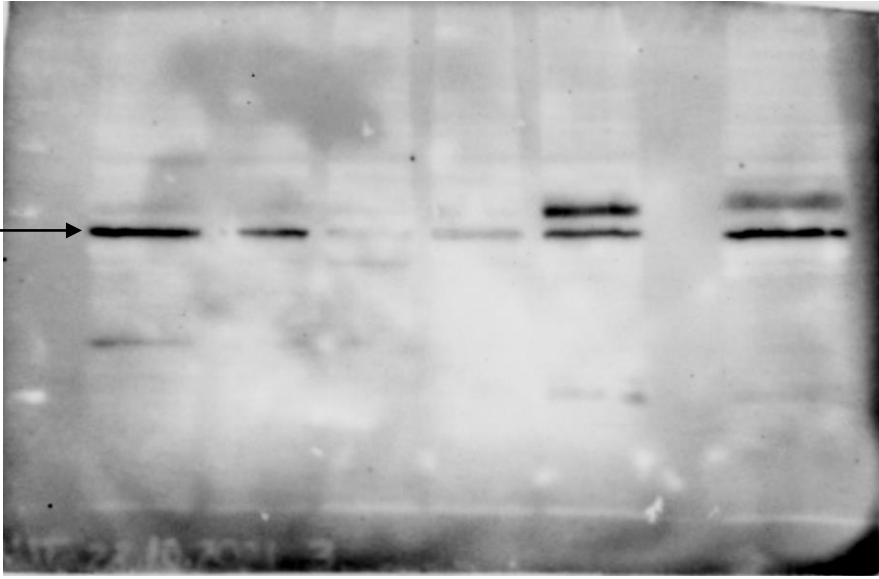

4

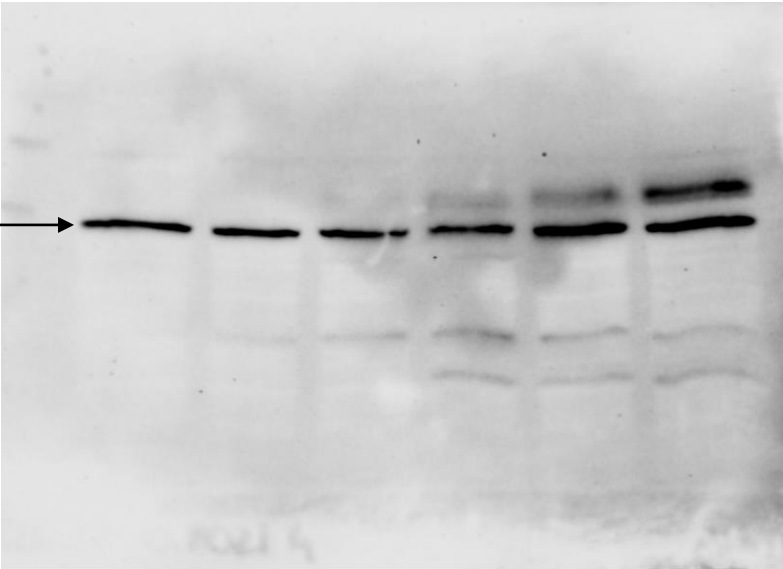

5

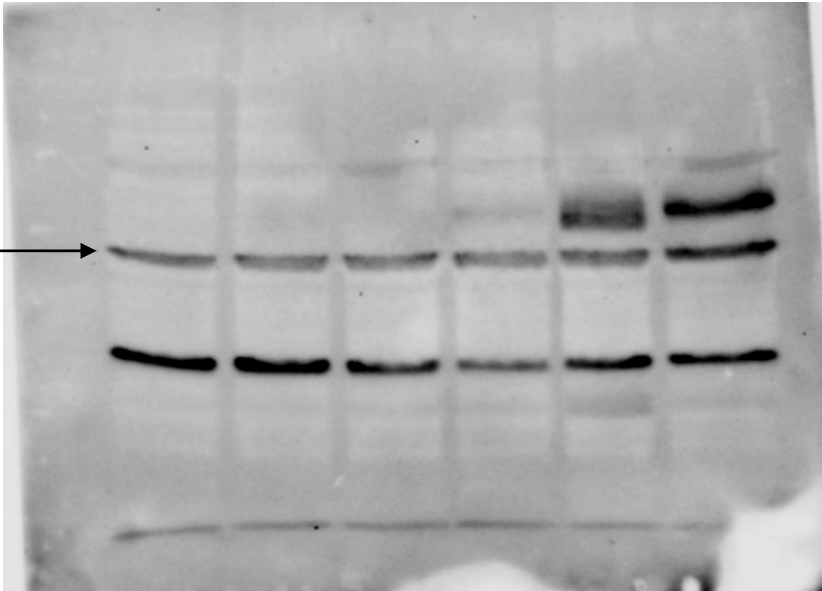

6

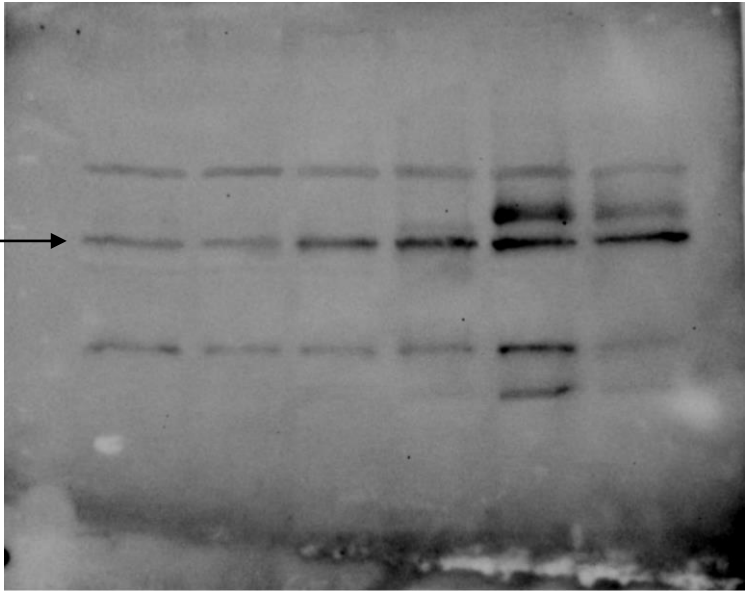

SIRT3 - Ponceau S

Samples order from the molecular weight marker: **MTX** | **DOX18** | **CTRL** | DOX9-1 | CTRL-2 | DOX9-2

This study

Other study

1

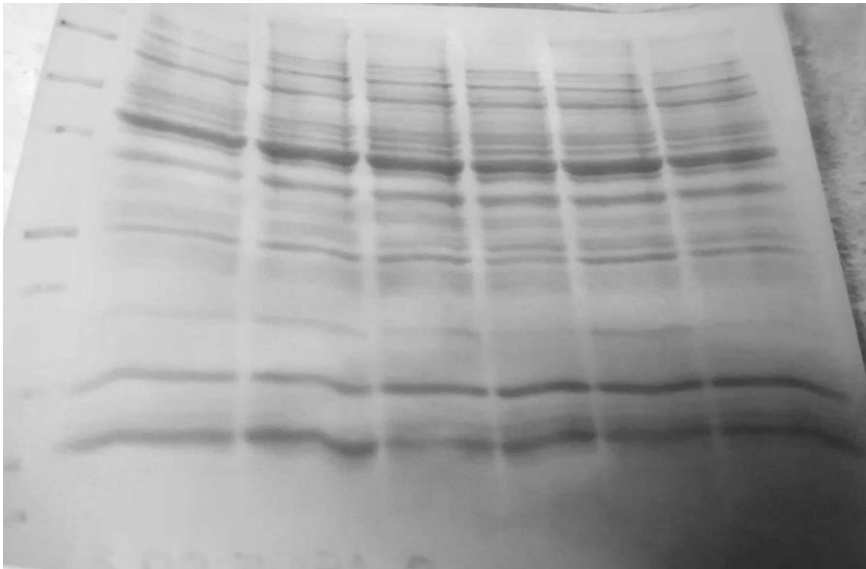

2

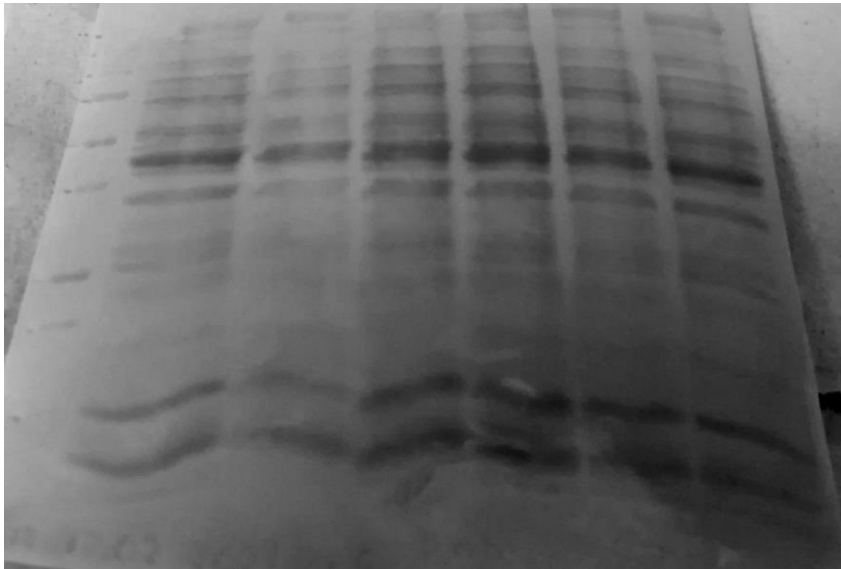

3

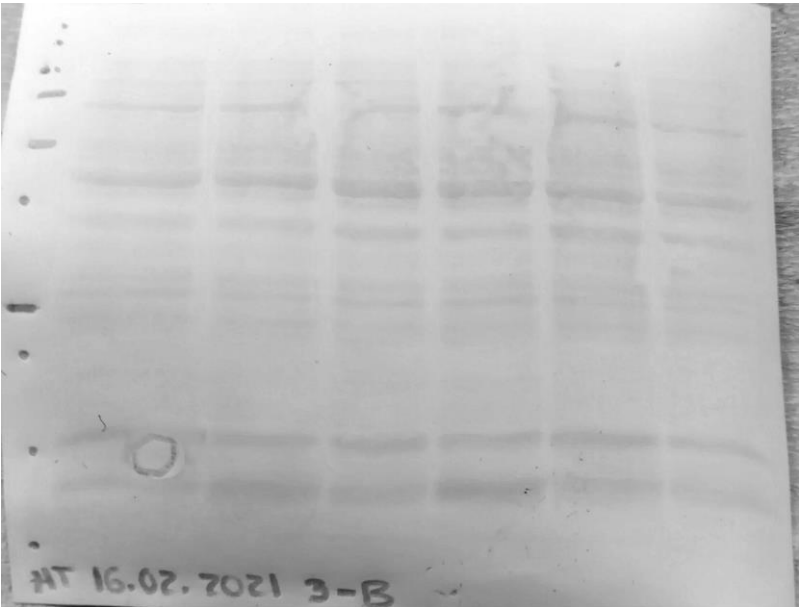

4

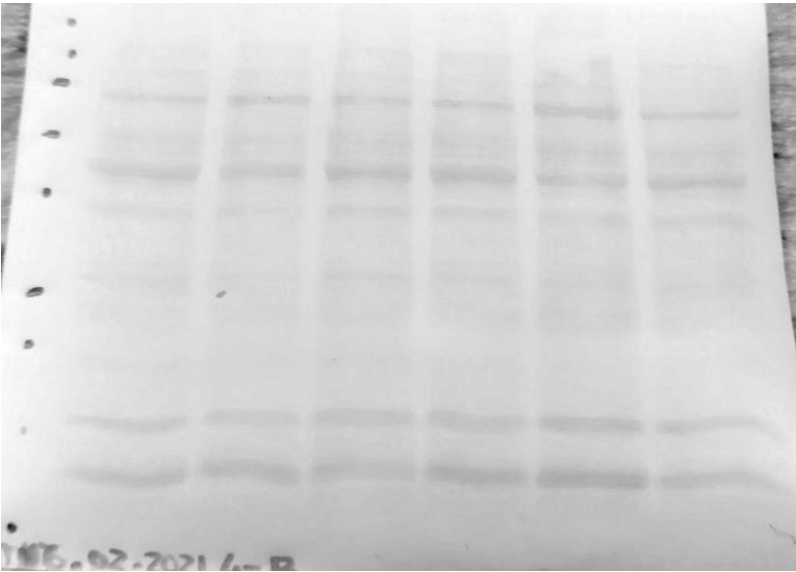

5

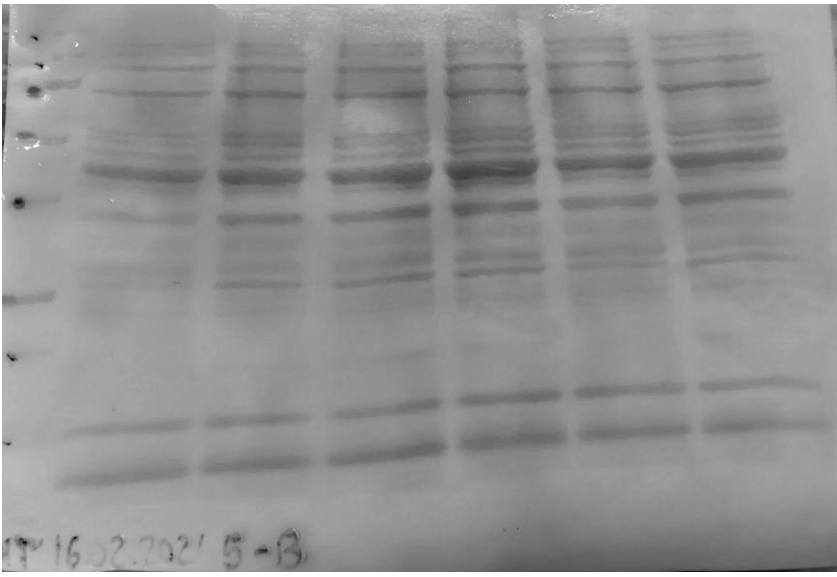

6

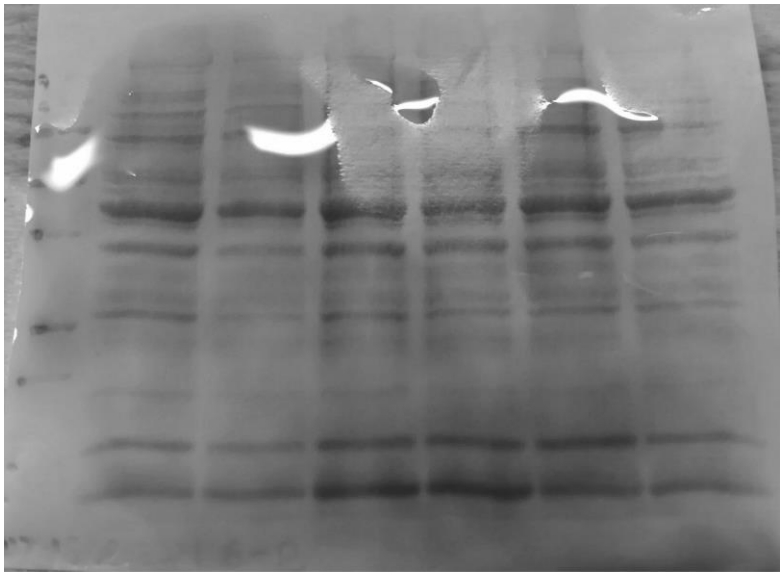



SIRT3 - Blot

Samples order from the molecular weight marker: MTX | DOX18 | CTRL | DOX9-1 | CTRL-2 | DOX9-2  
Other study

1

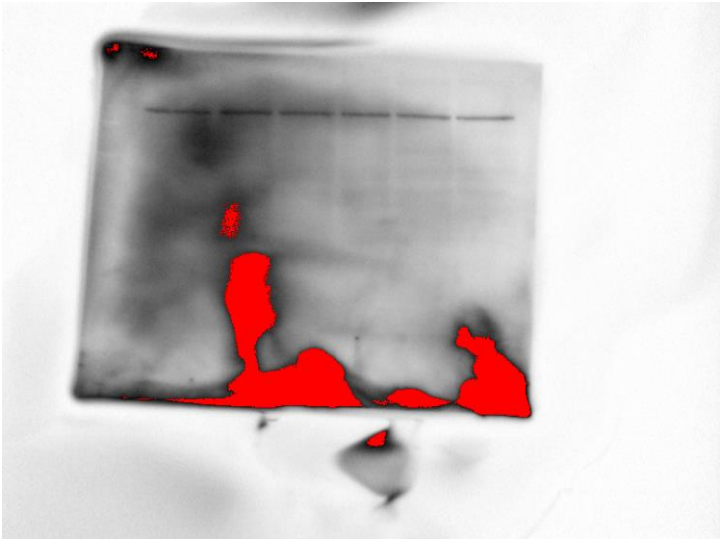

2

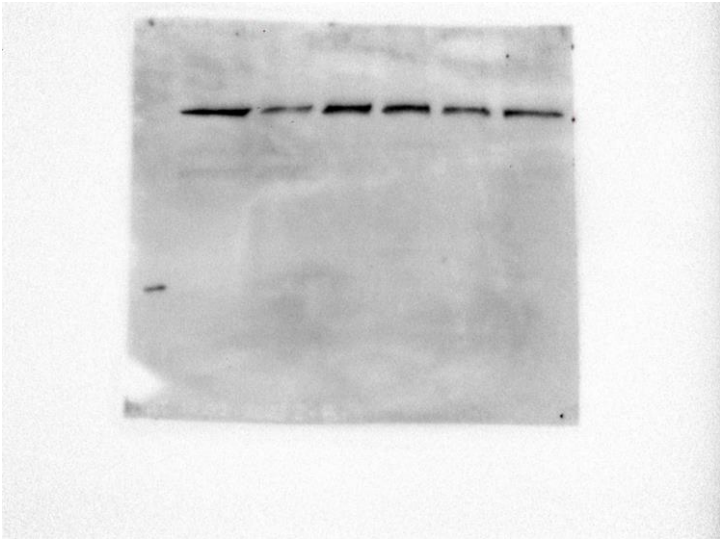

3

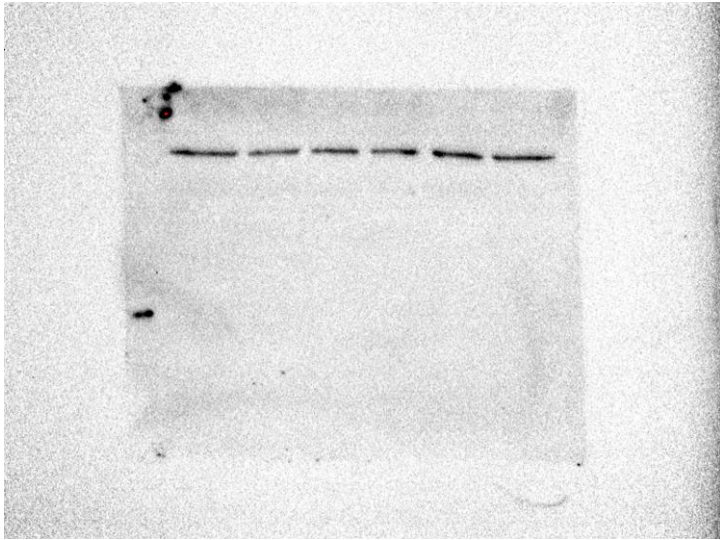

4

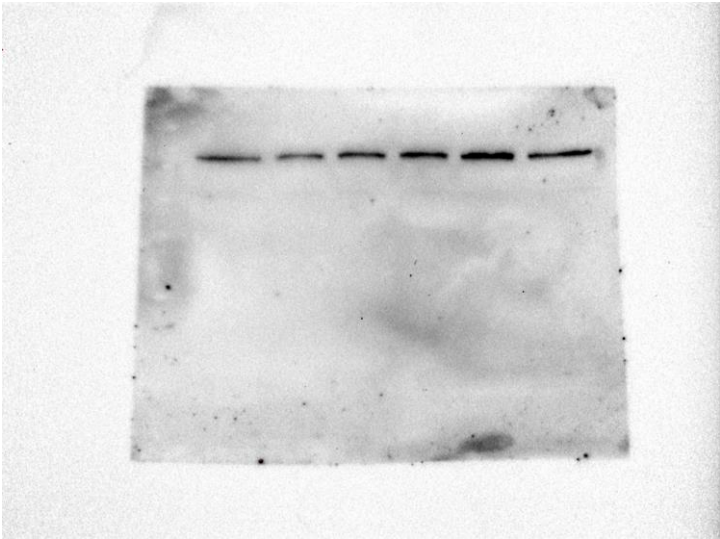

5

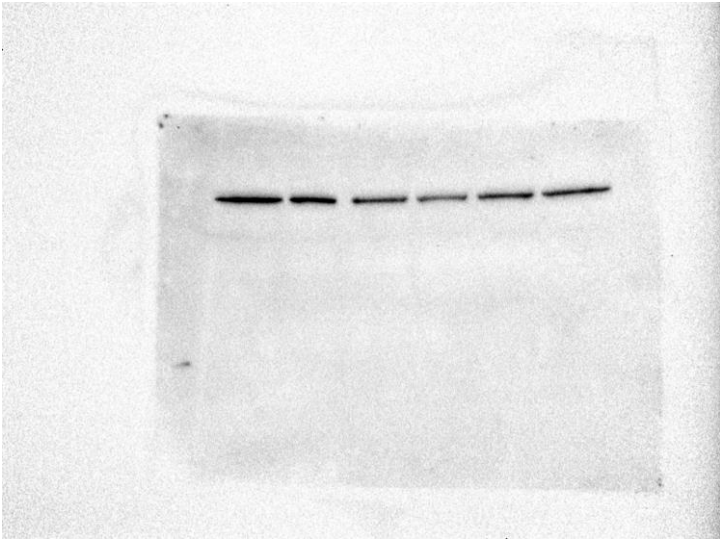

6

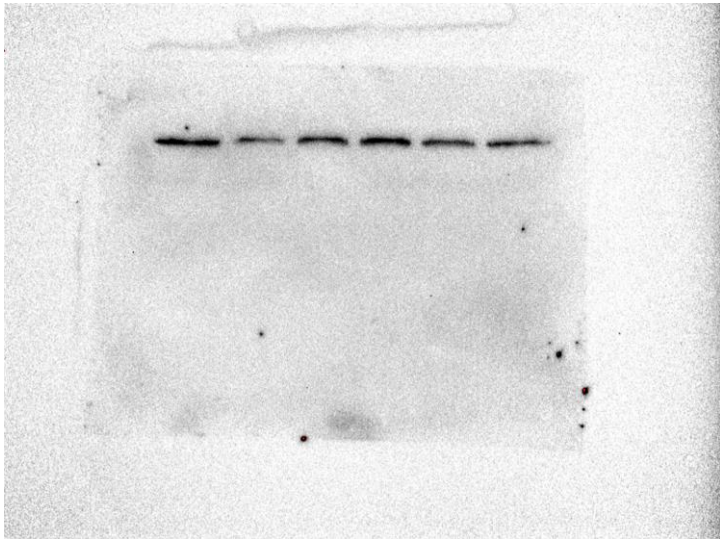

Tfam - Ponceau S

Samples order from the molecular weight marker: **MTX** | **DOX18** | **CTRL** | DOX9-1 | CTRL-2 | DOX9-2

This study

Other study

1

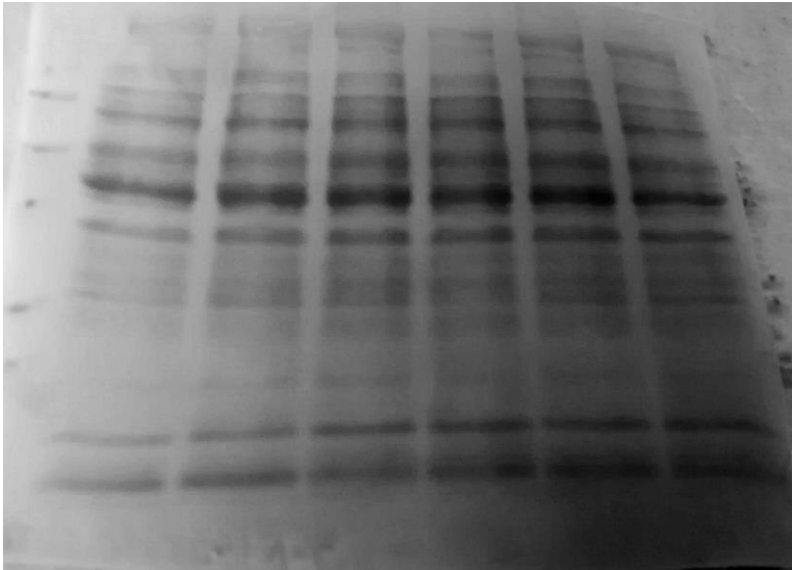

2

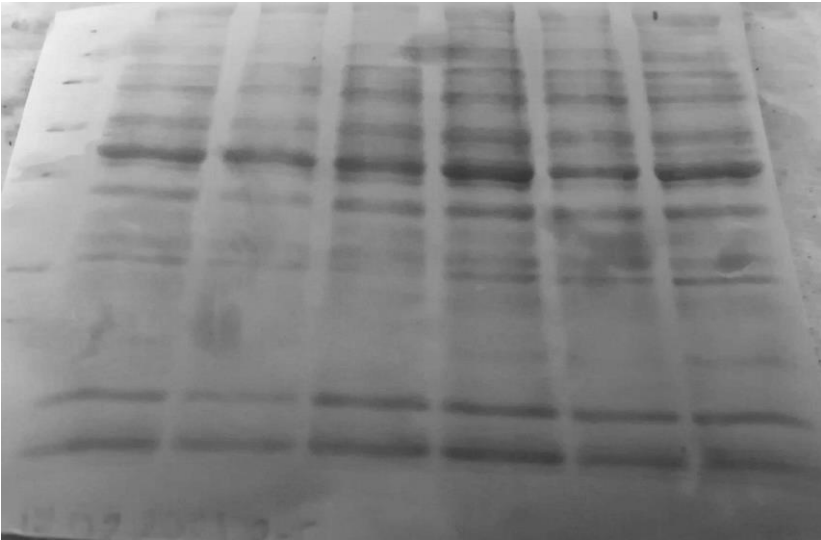

3

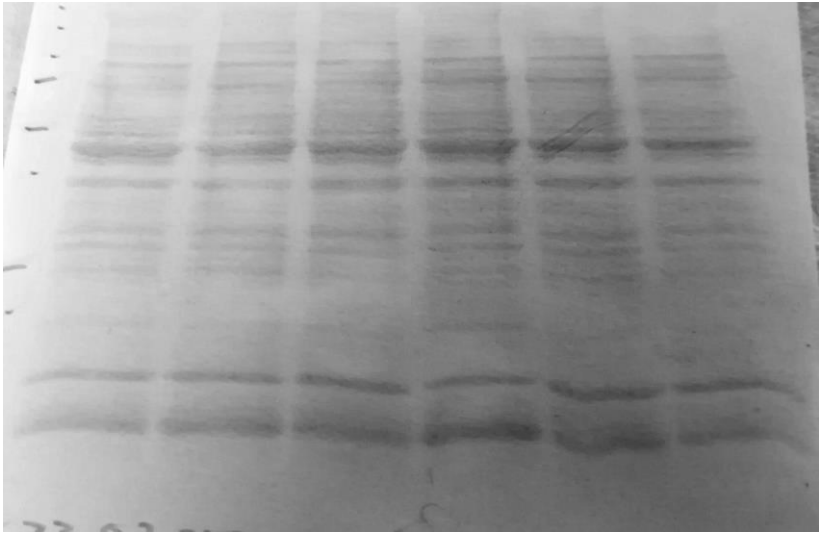

4

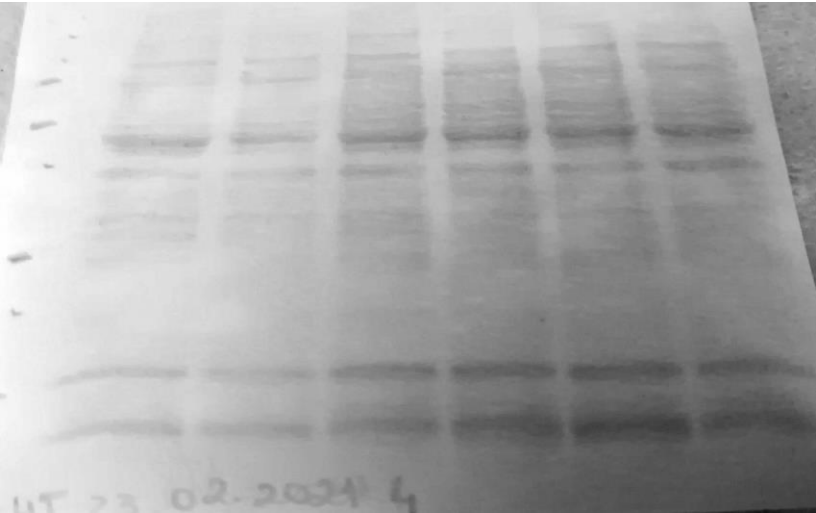

5

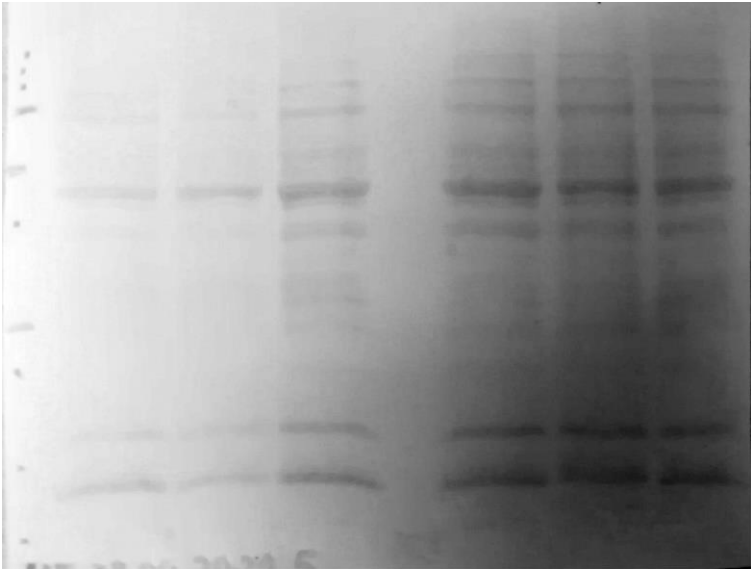

6

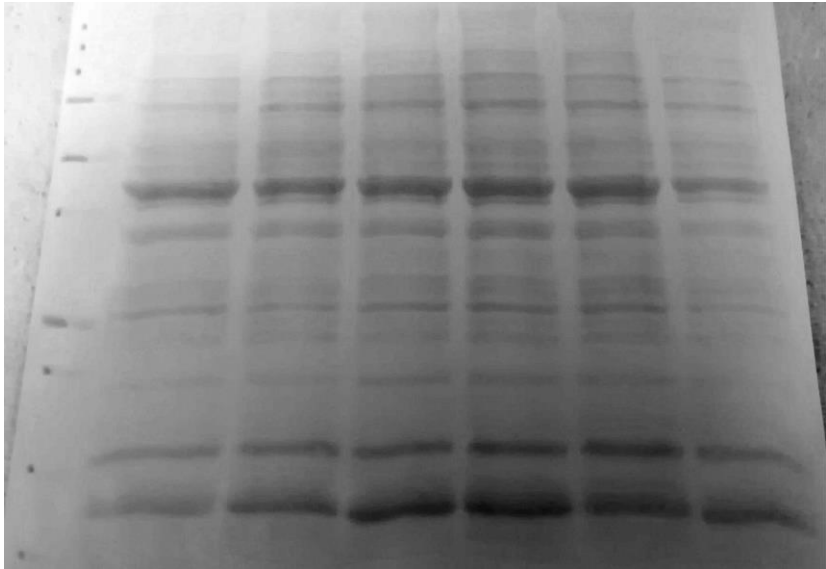



Tfam - Blot

Samples order from the molecular weight marker: MTX | DOX18 | CTRL | DOX9-1 | CTRL-2 | DOX9-2  
Other study

1

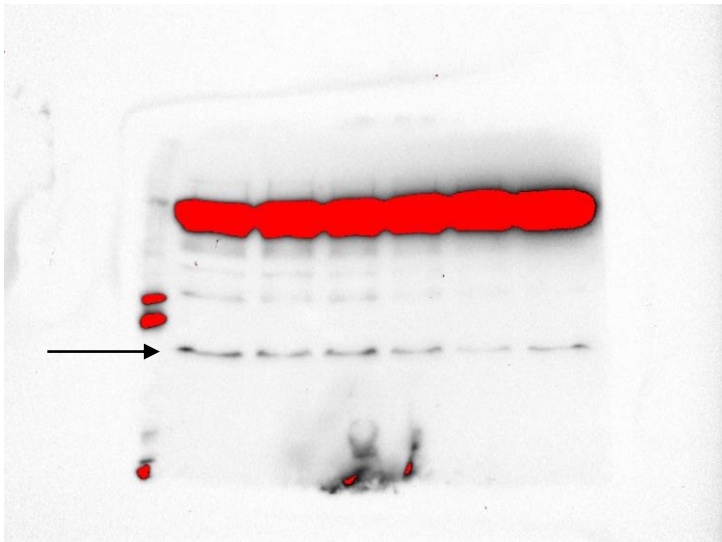

2

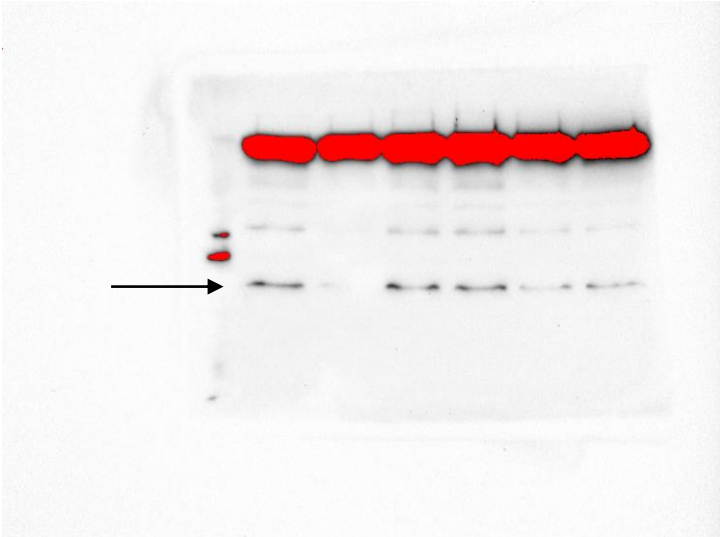

3

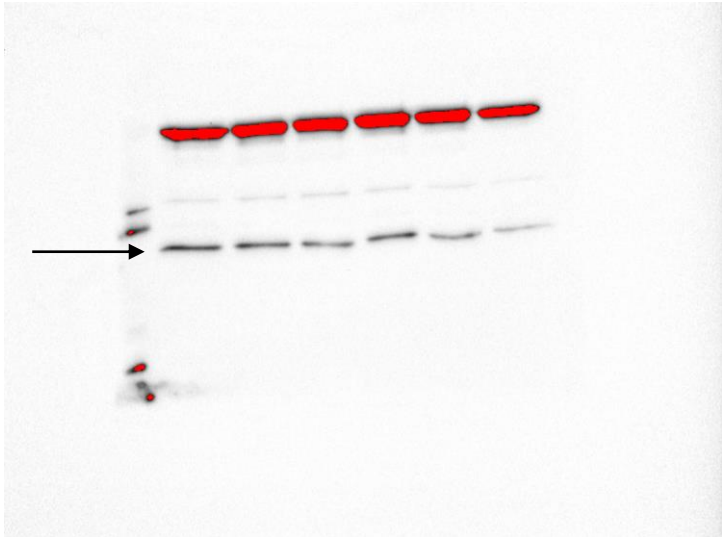

4

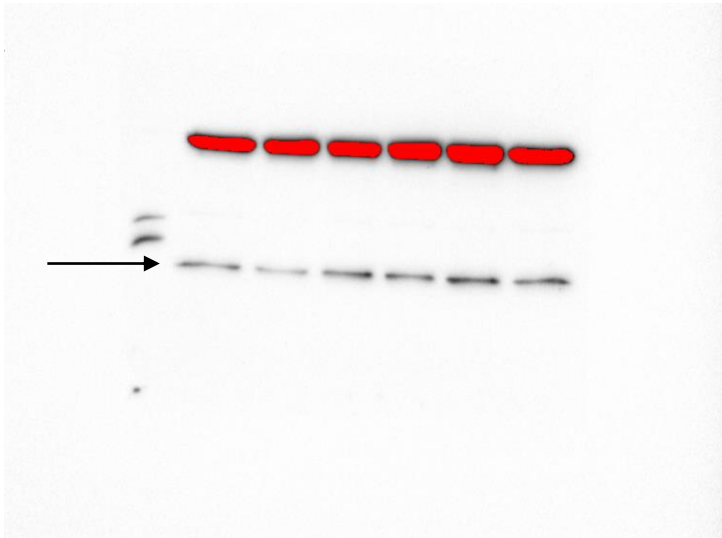

5

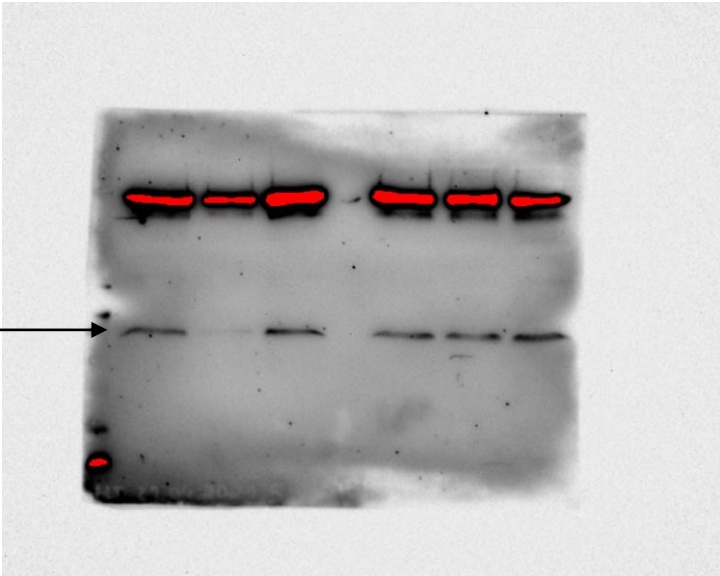

6

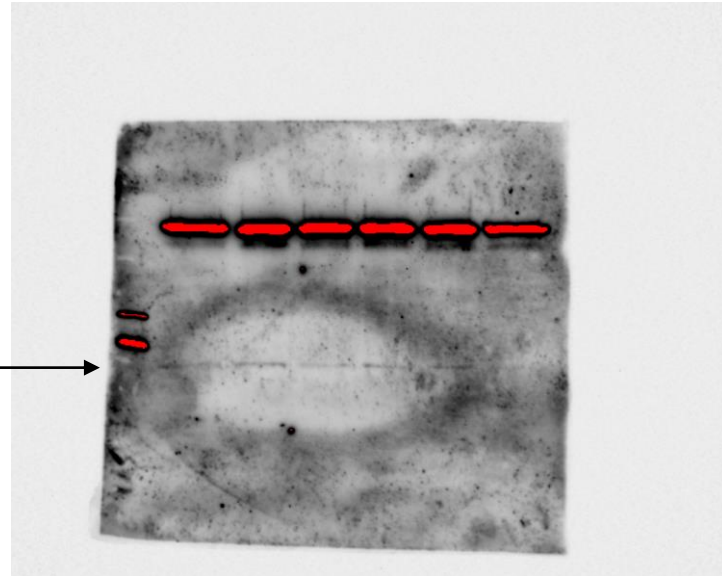

PGC-1 $\alpha$  - Ponceau S

Samples order from the molecular weight marker: **MTX** | **DOX18** | **CTRL** | DOX9-1 | CTRL-2 | DOX9-2

This study

Other study

1

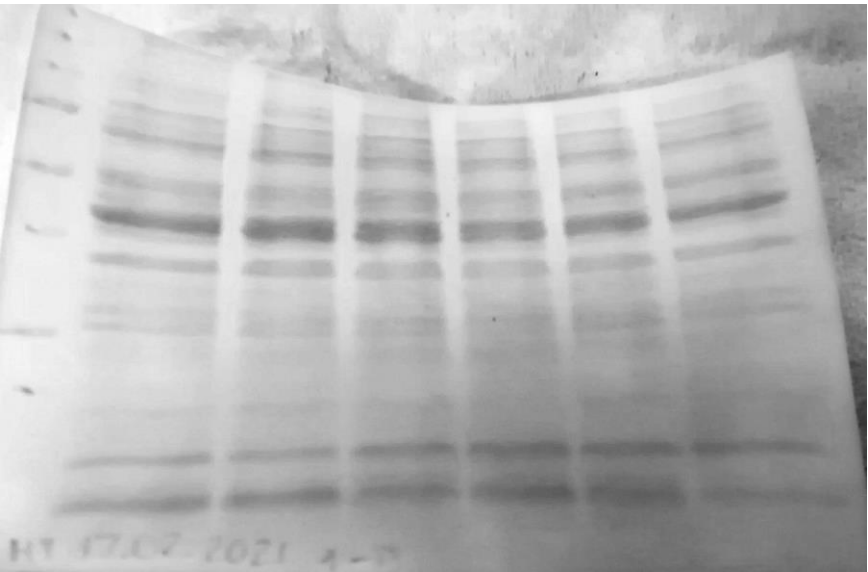

2

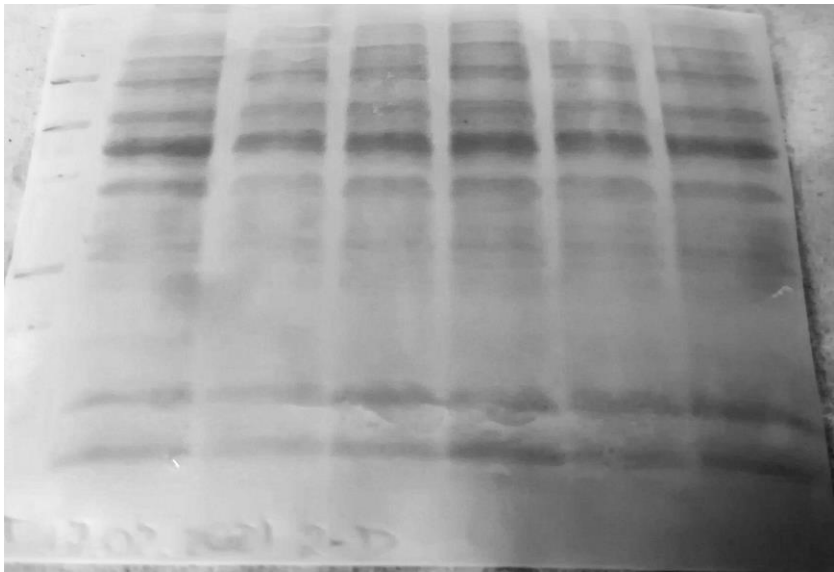

3

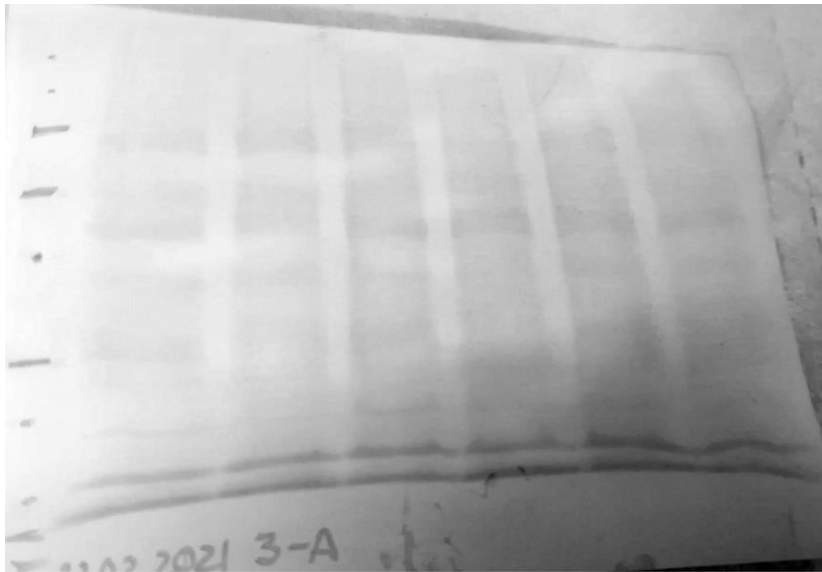

4

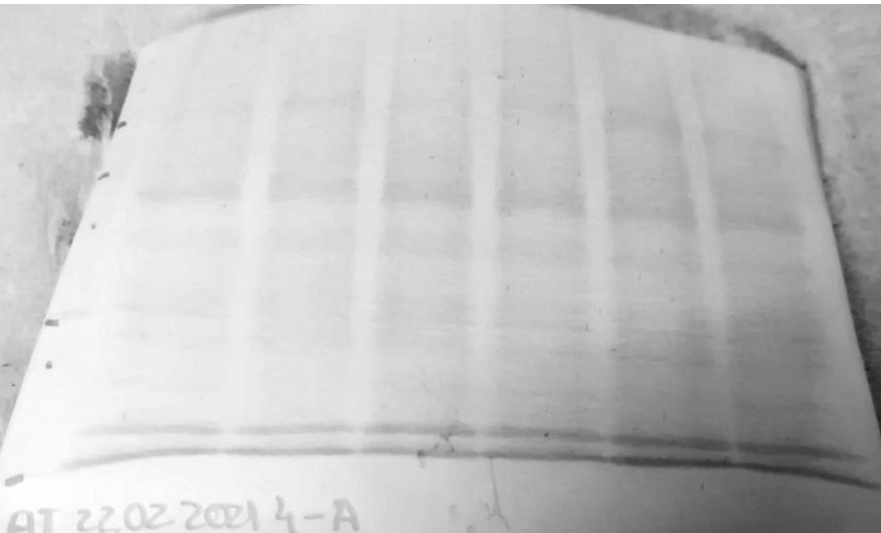

5

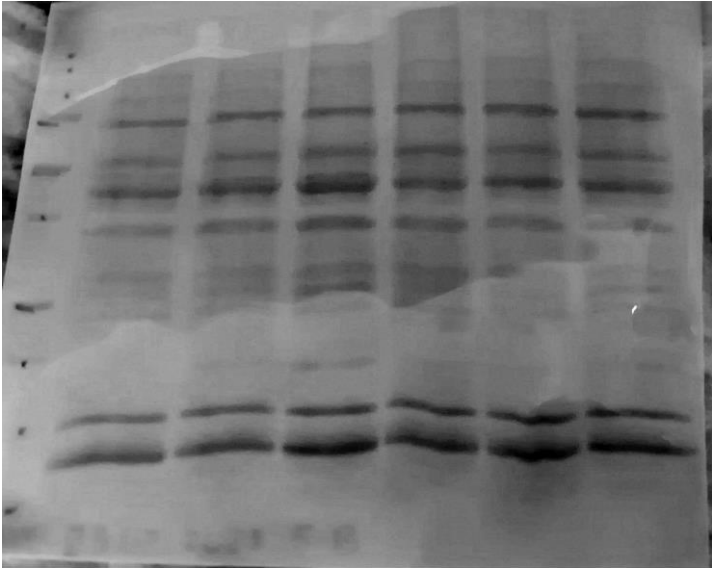

6

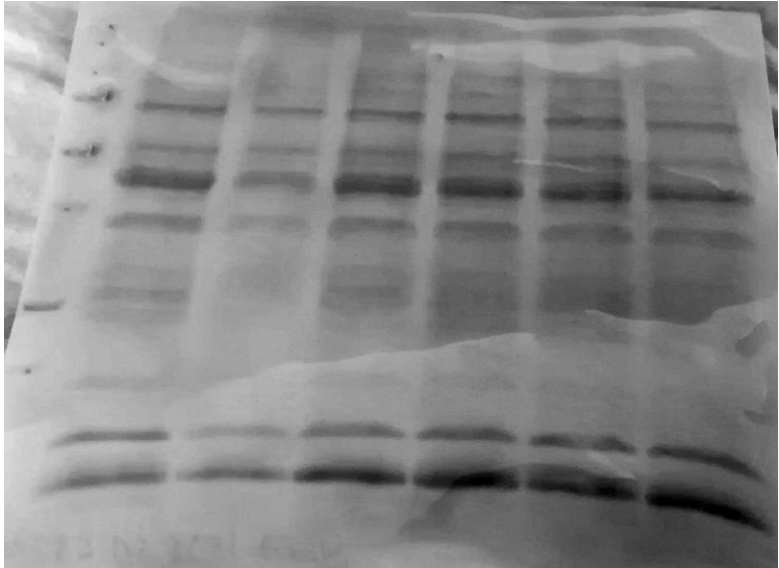



PGC-1α - Blot

Samples order from the molecular weight marker: MTX | DOX18 | CTRL | DOX9-1 | CTRL-2 | DOX9-2  
Other study

1

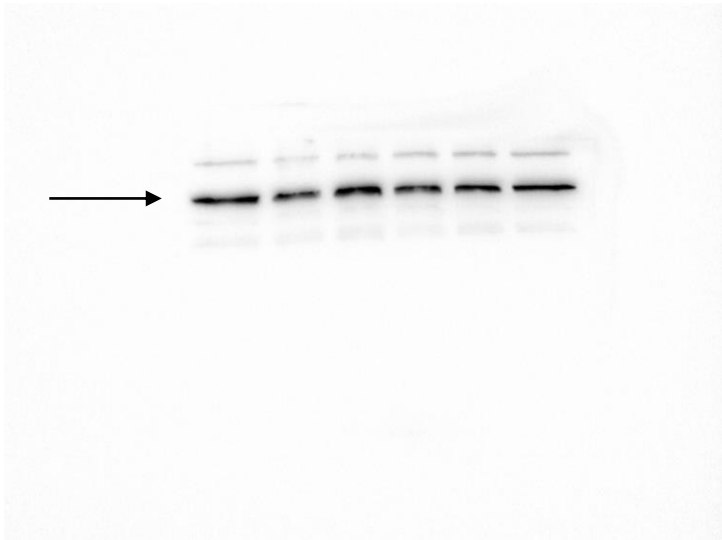

2

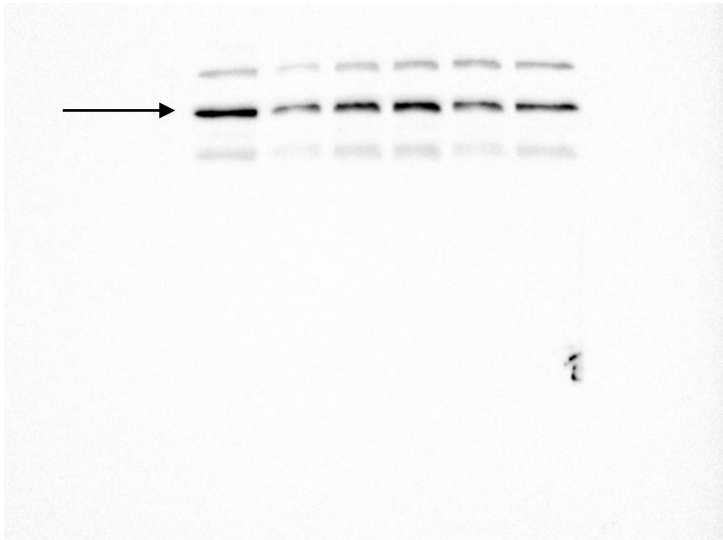

3

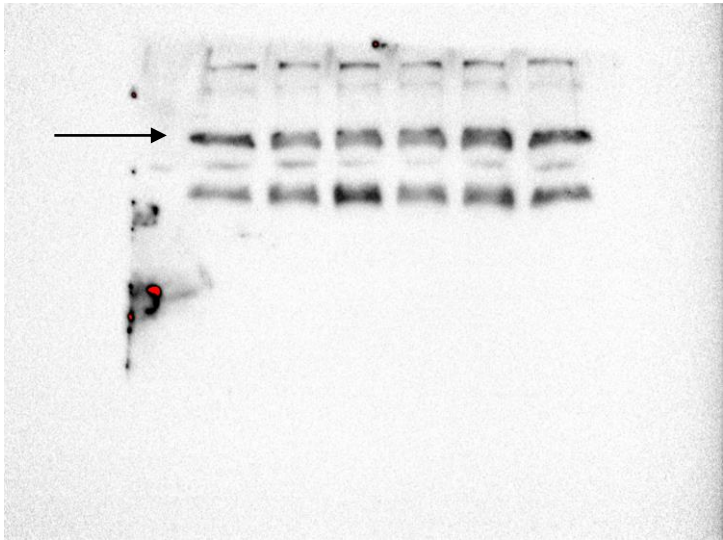

4

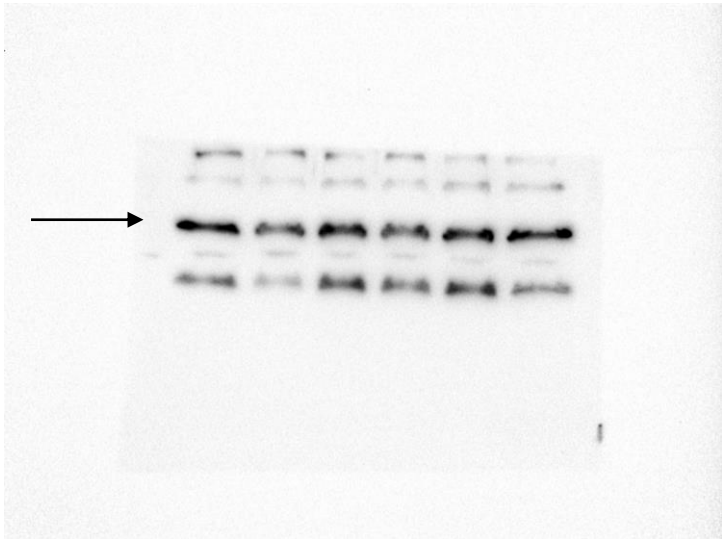

5

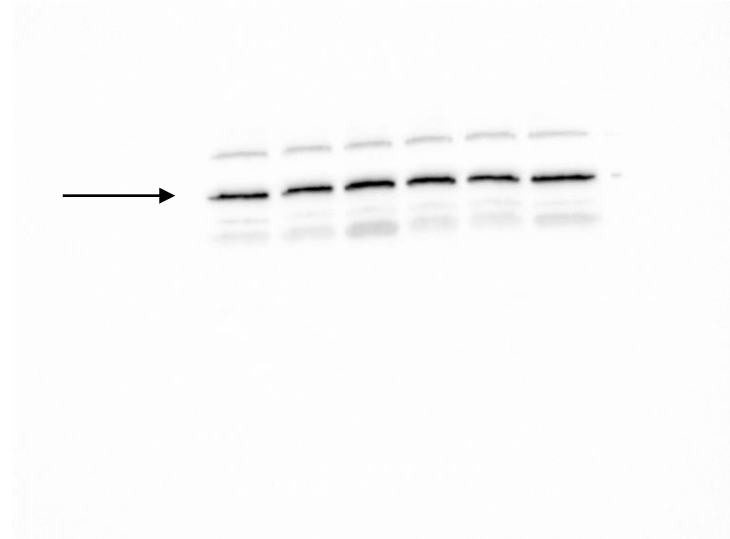

6

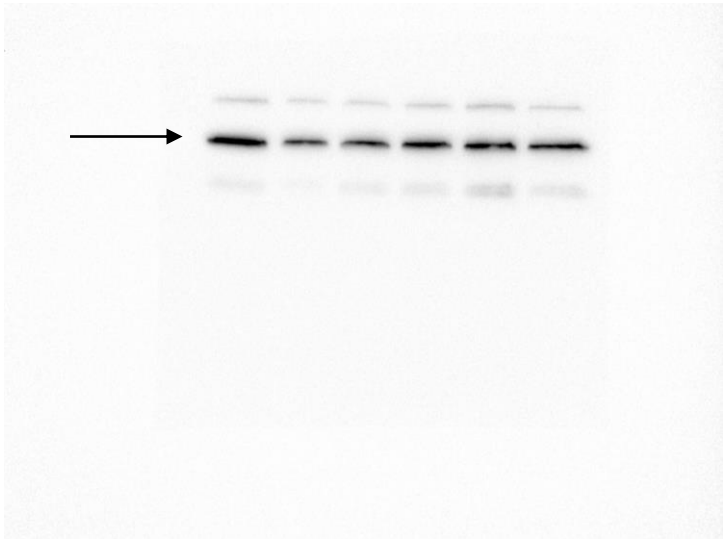

Mfn1 - Ponceau S

Samples order from the molecular weight marker: **MTX** | **DOX18** | **CTRL** | DOX9-1 | CTRL-2 | DOX9-2

This study

Other study

1

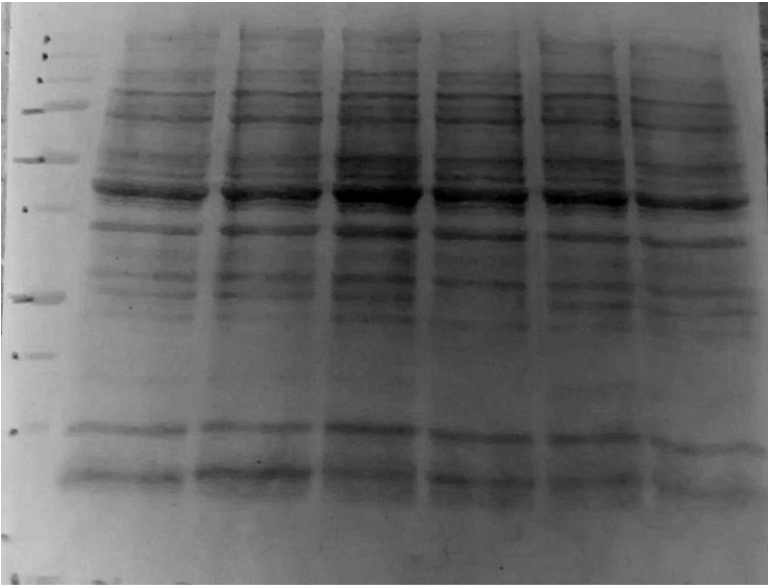

2



3

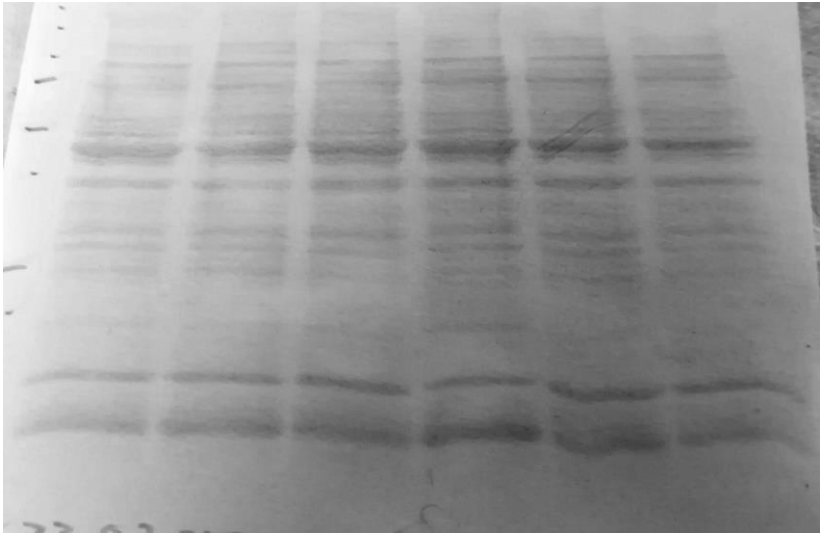

4

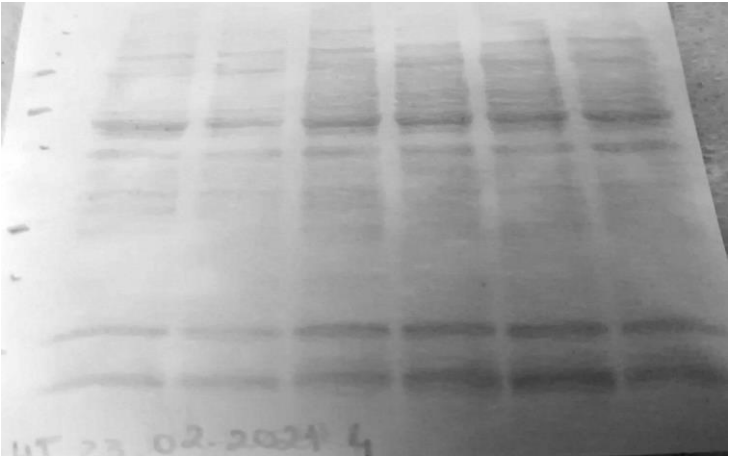

5

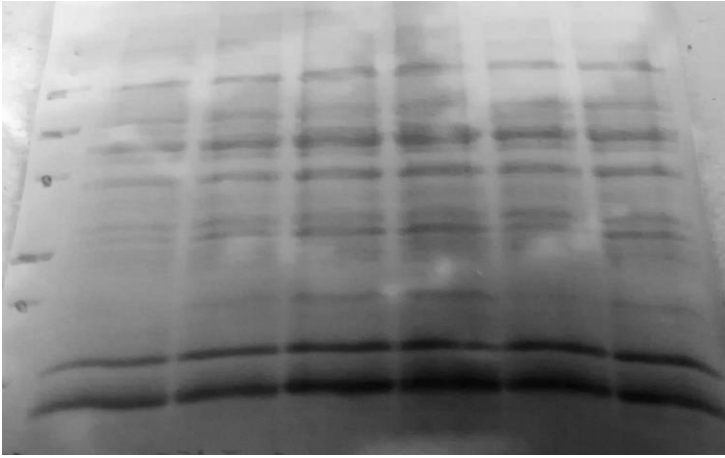

6

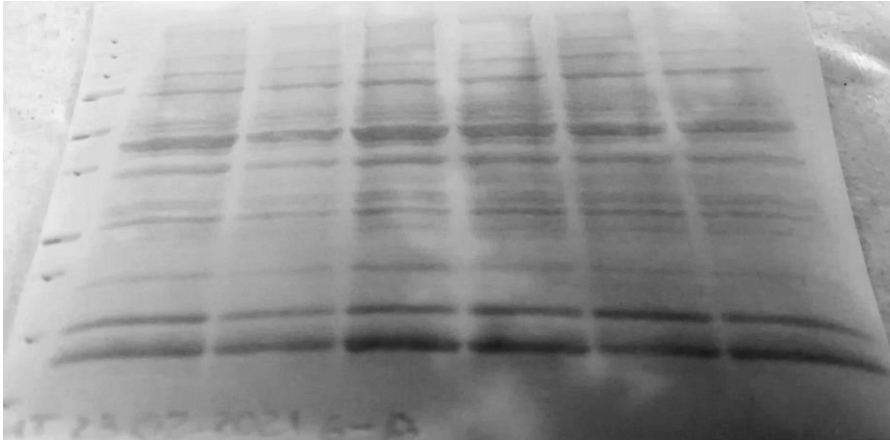

Mfn1 - Blot

Samples order from the molecular weight marker: **MTX** | **DOX18** | **CTRL** | DOX9-1 | CTRL-2 | DOX9-2

This study

Other study

1

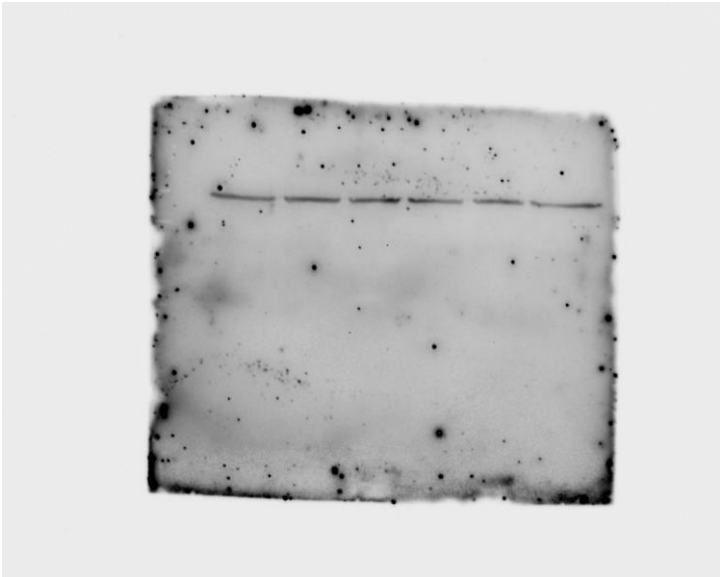

2

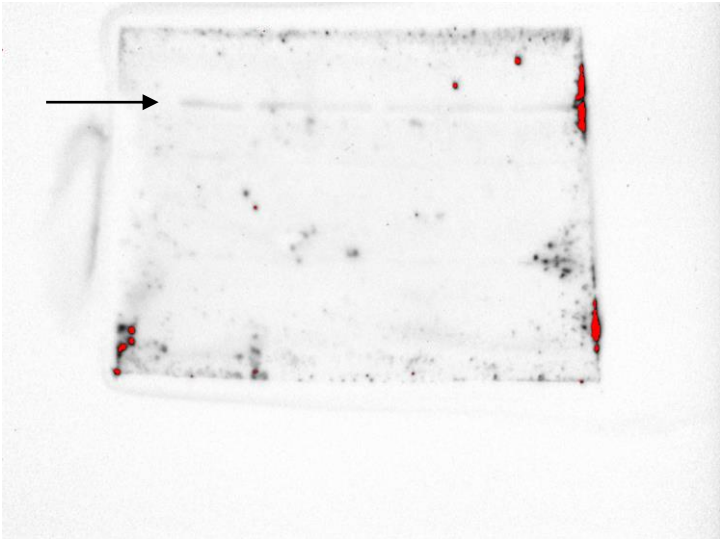

3

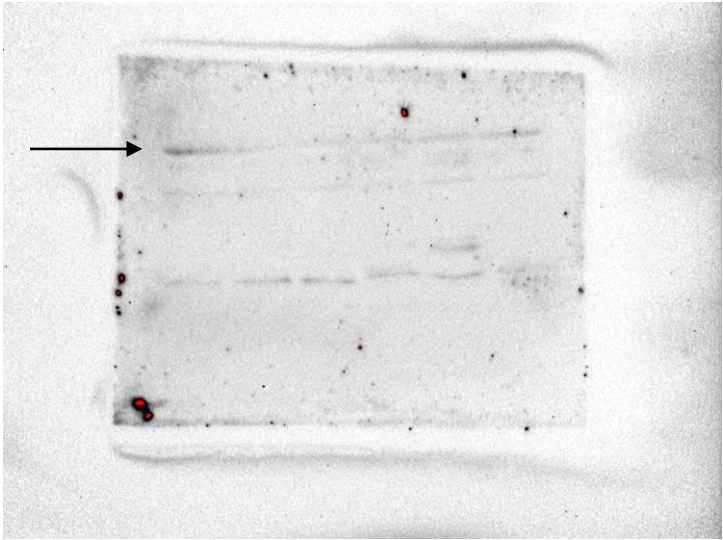

4

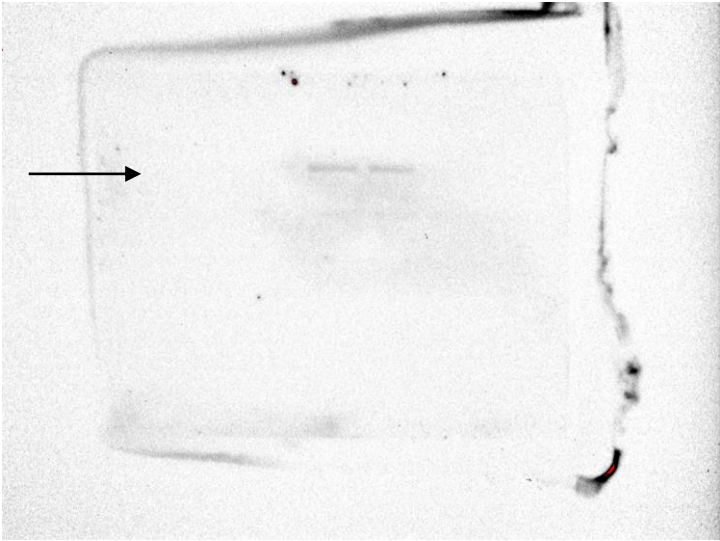

5

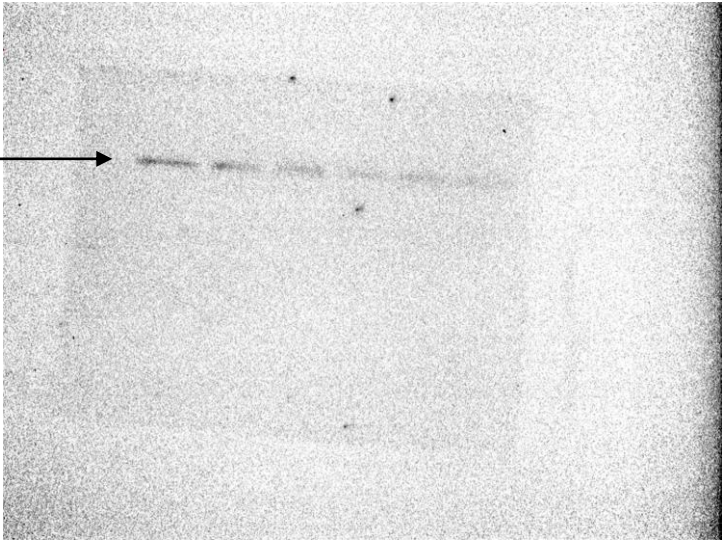

6

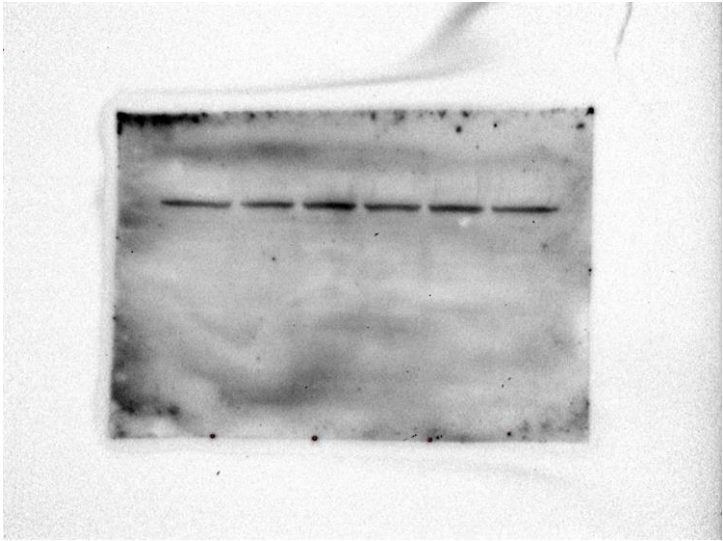



Beclin1 - Ponceau S

Samples order from the molecular weight marker: **MTX** | **DOX18** | **CTRL** | DOX9-1 | CTRL-2 | DOX9-2

This study

DOX9-1 | CTRL-2 | DOX9-2

Other study

1

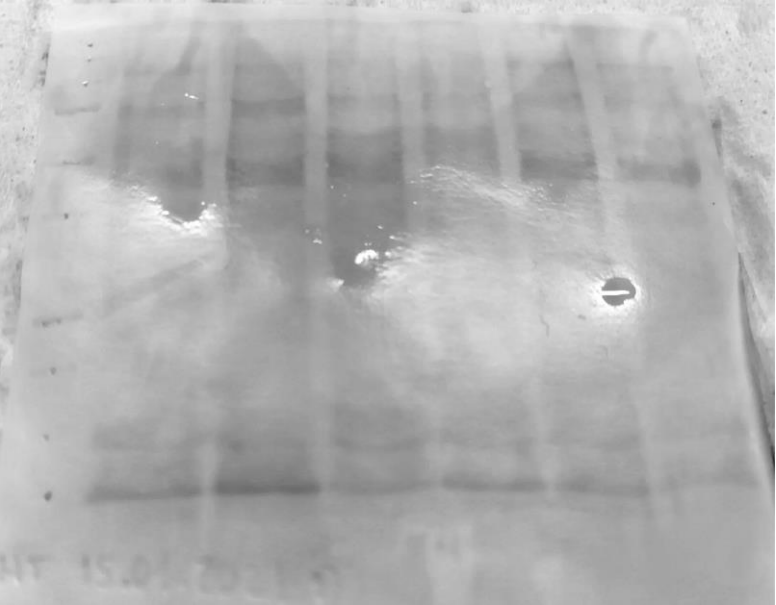

2

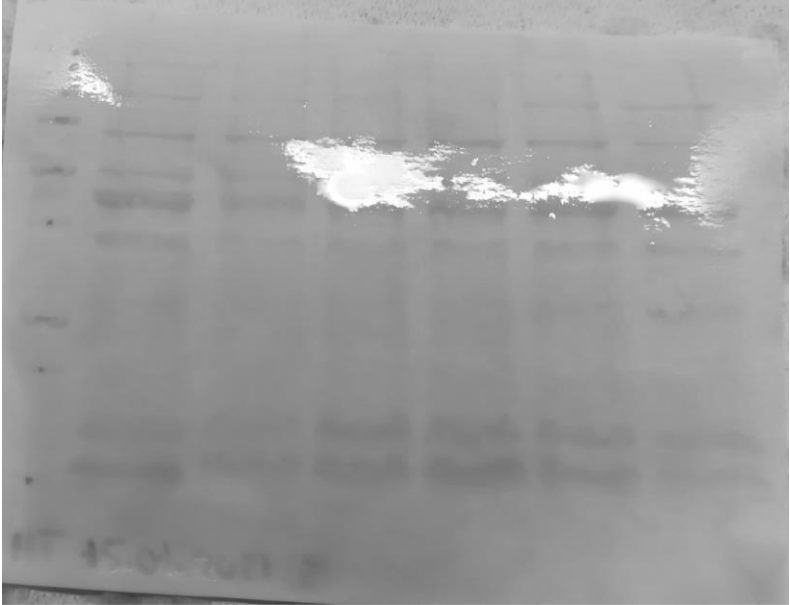

3

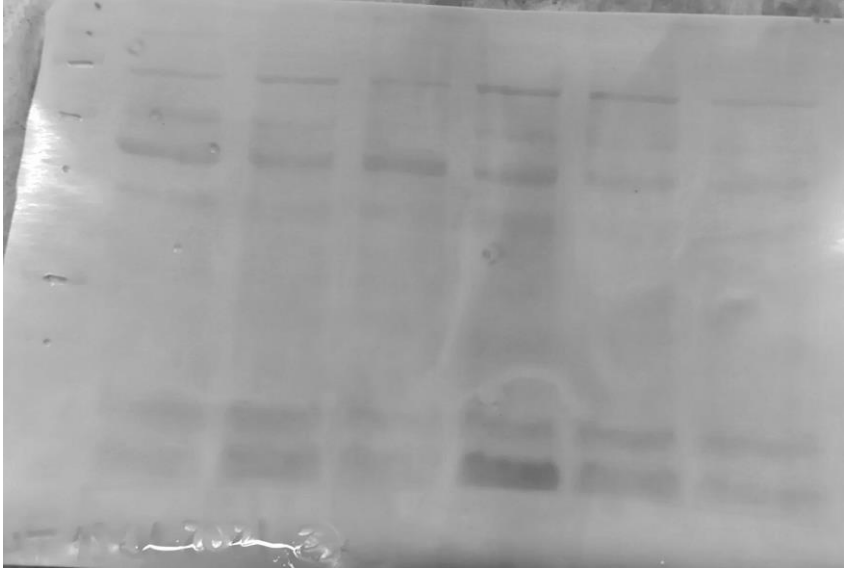

4

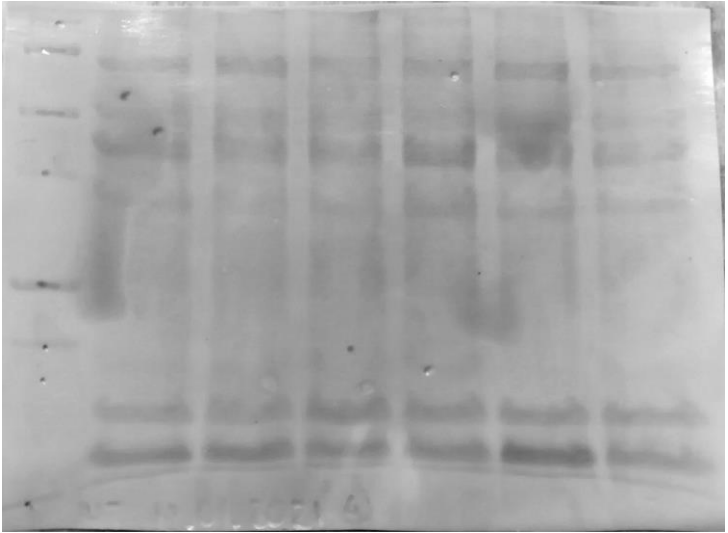

5

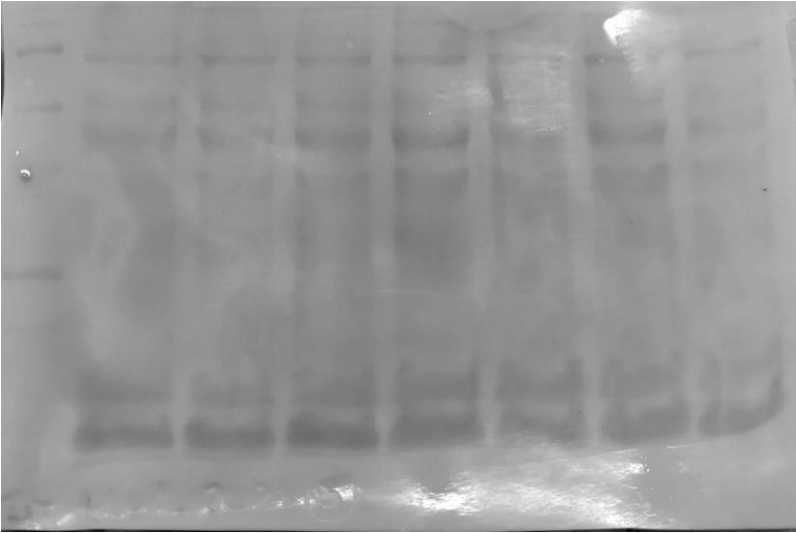

6

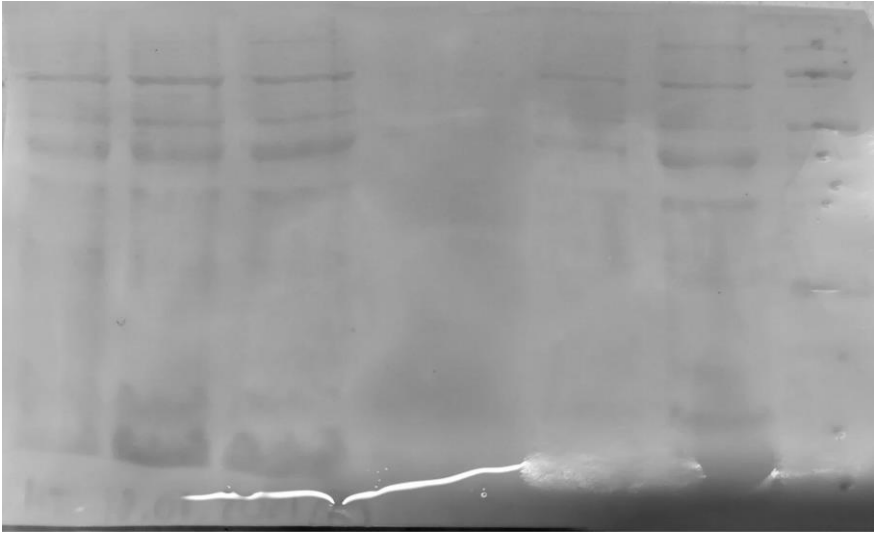



Beclin1 - Blot

Samples order from the molecular weight marker: **MTX** | **DOX18** | **CTRL** | DOX9-1 | CTRL-2 | DOX9-2

This study

Other study

1

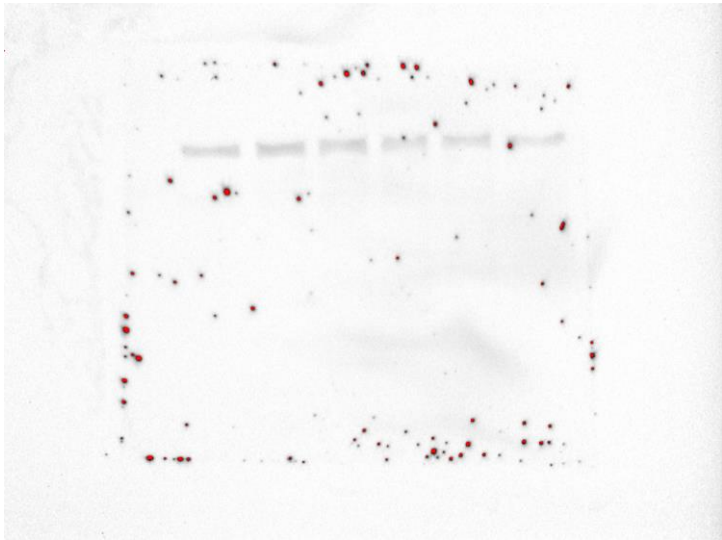

2

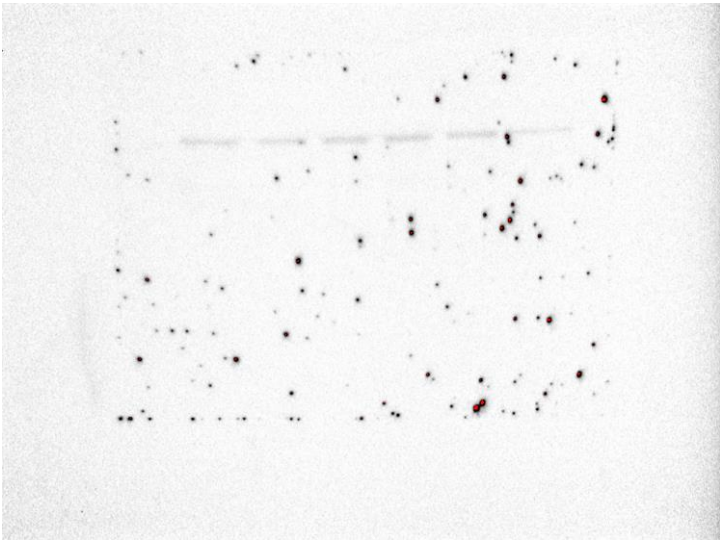

3

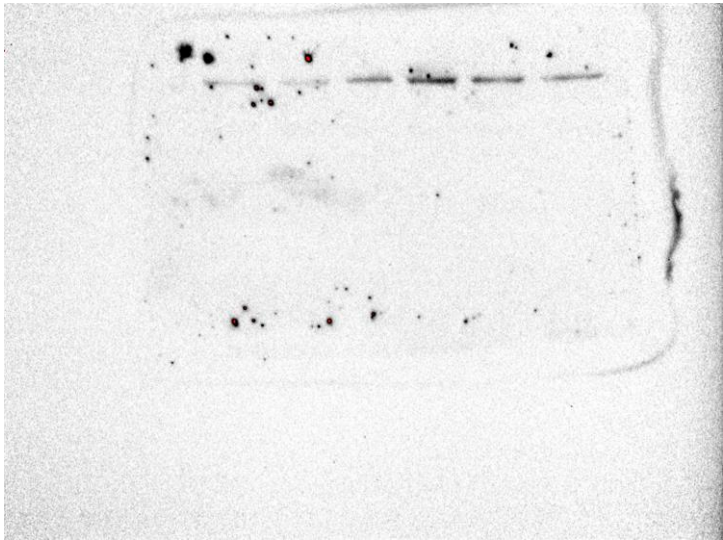

4

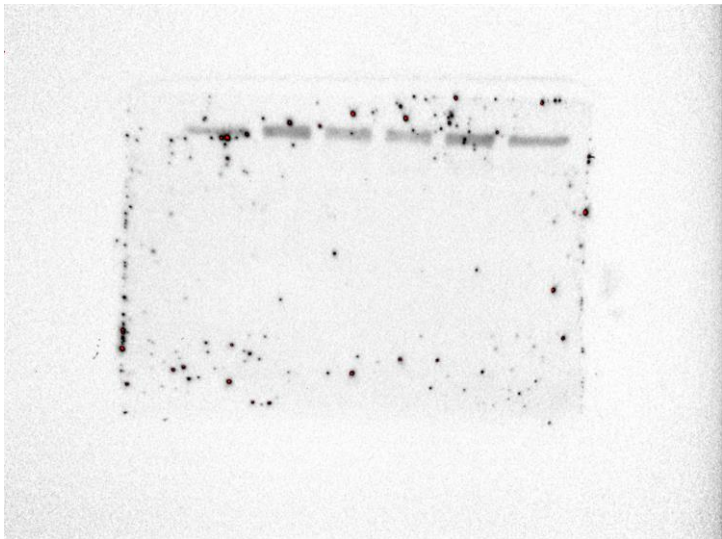

5

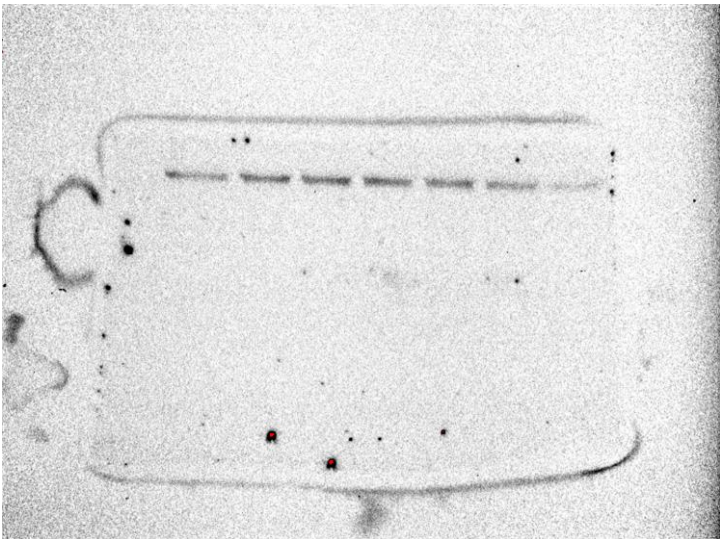

6

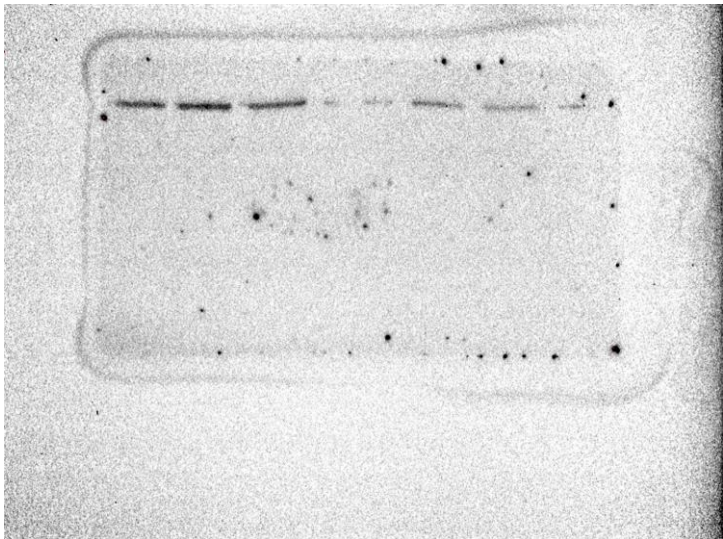

ATG5 - Ponceau S

Samples order from the molecular weight marker: **MTX** | **DOX18** | **CTRL** | DOX9-1 | CTRL-2 | DOX9-2

This study

DOX9-1 | CTRL-2 | DOX9-2

Other study  
3

1

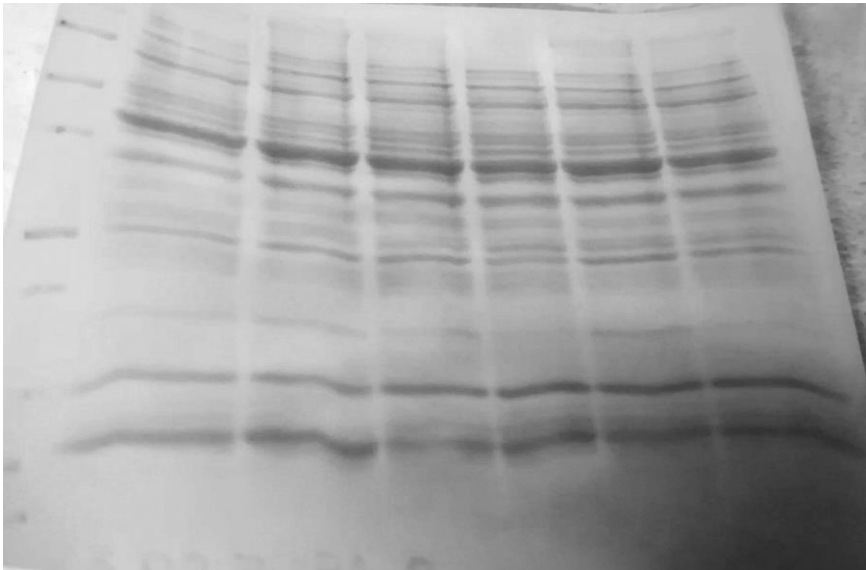

2

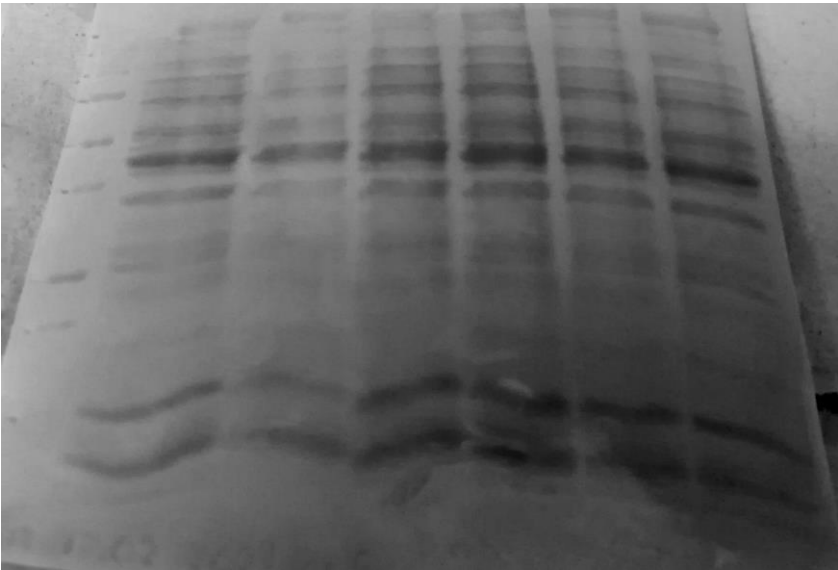

6

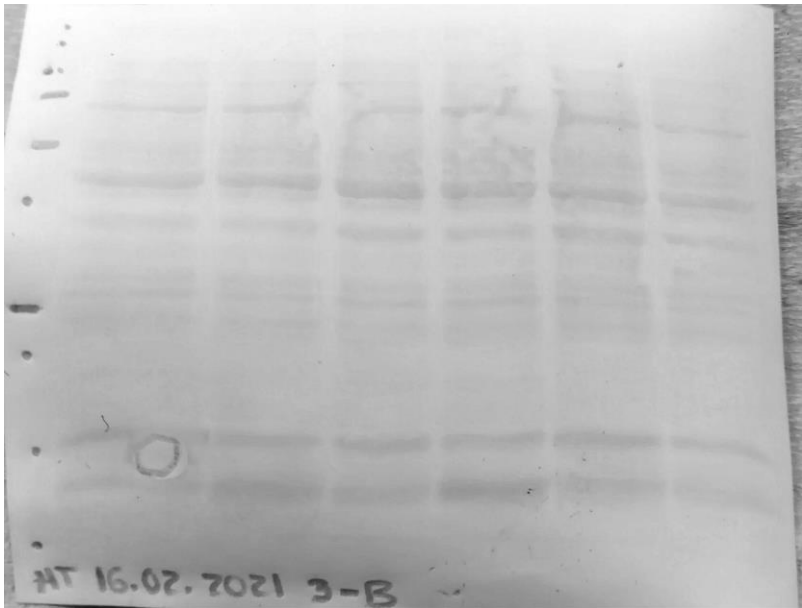

4

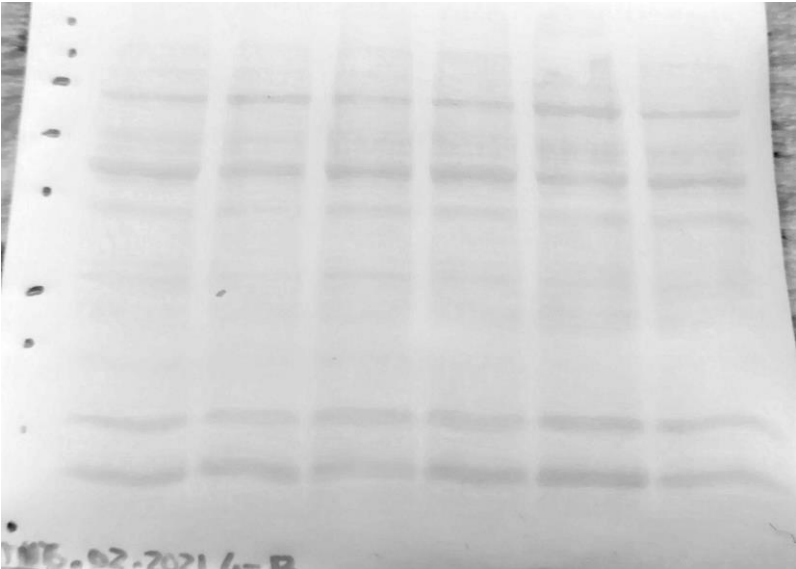

5

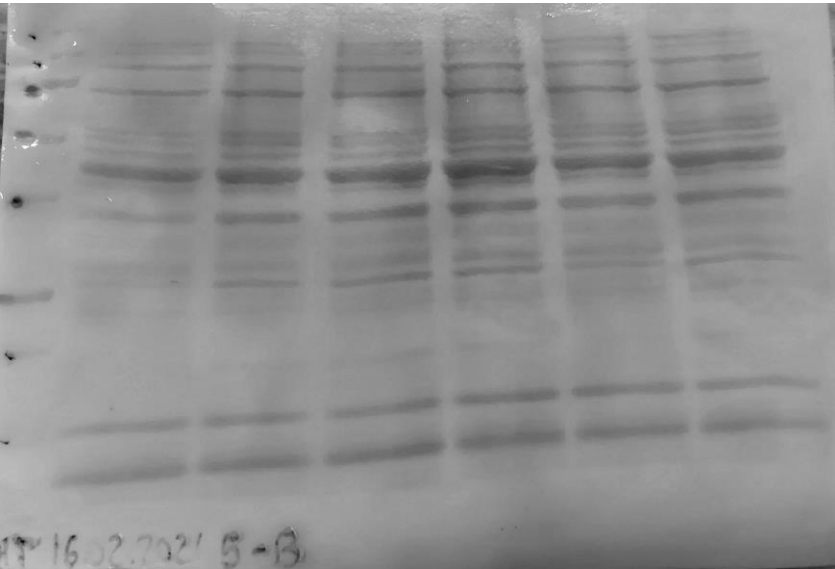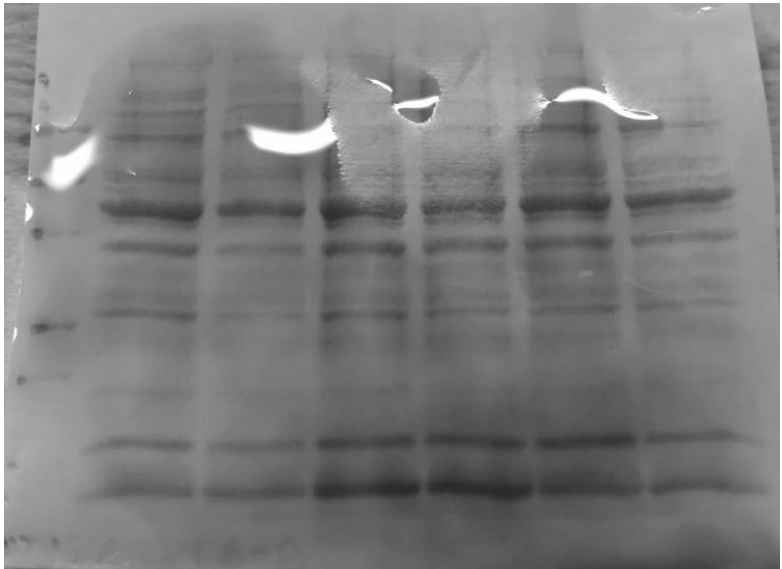



ATG5 - Blot

Samples order from the molecular weight marker: MTX | DOX18 | CTRL | DOX9-1 | CTRL-2 | DOX9-2  
Other study

1

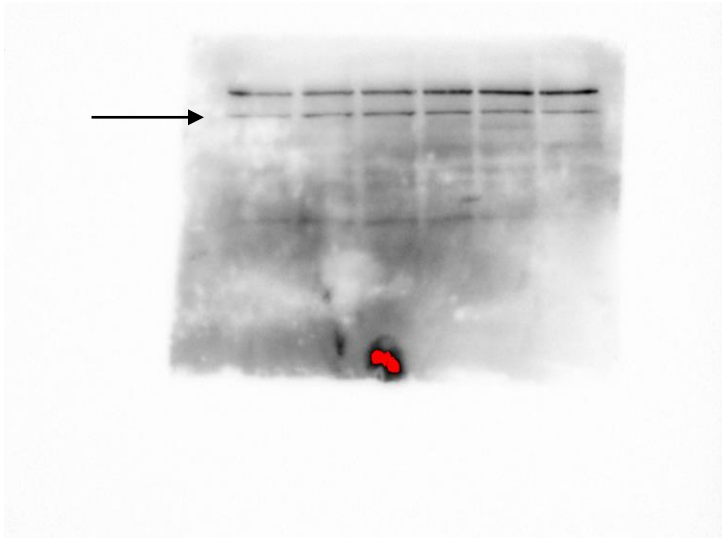

2

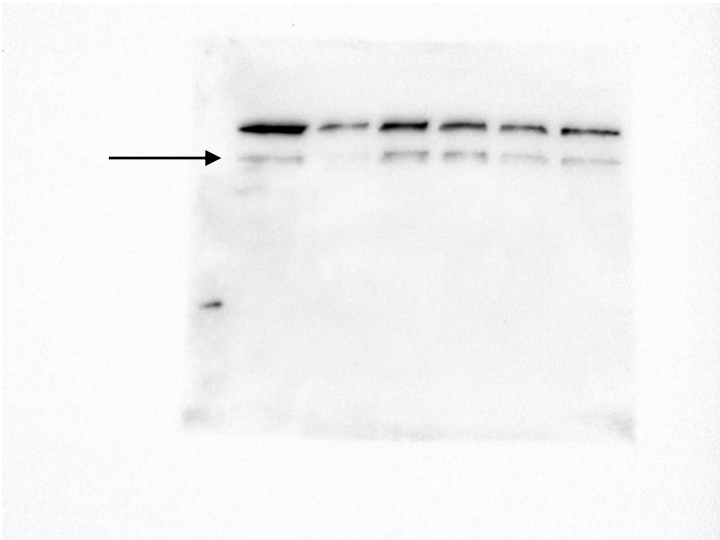

3

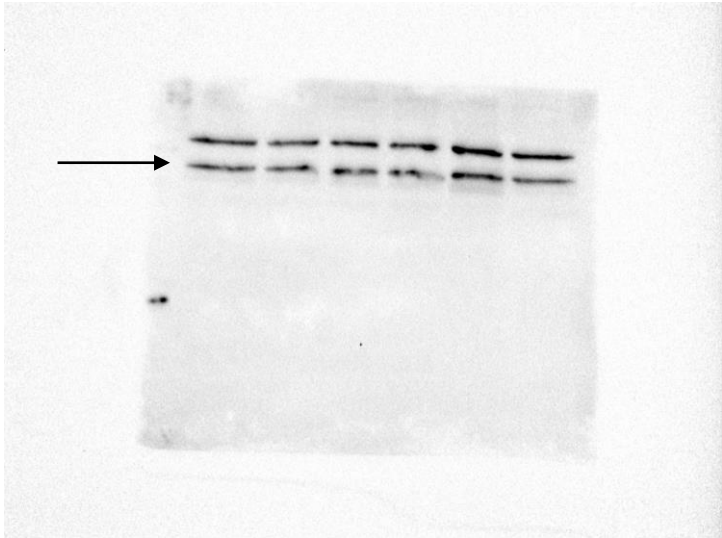

4

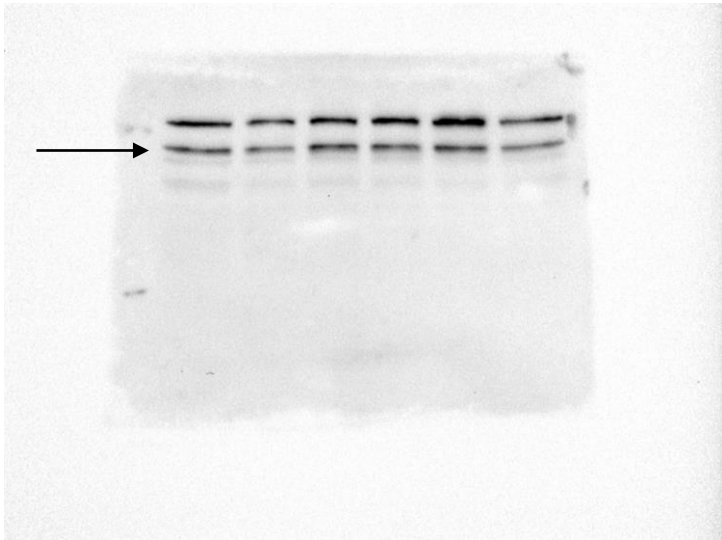

5

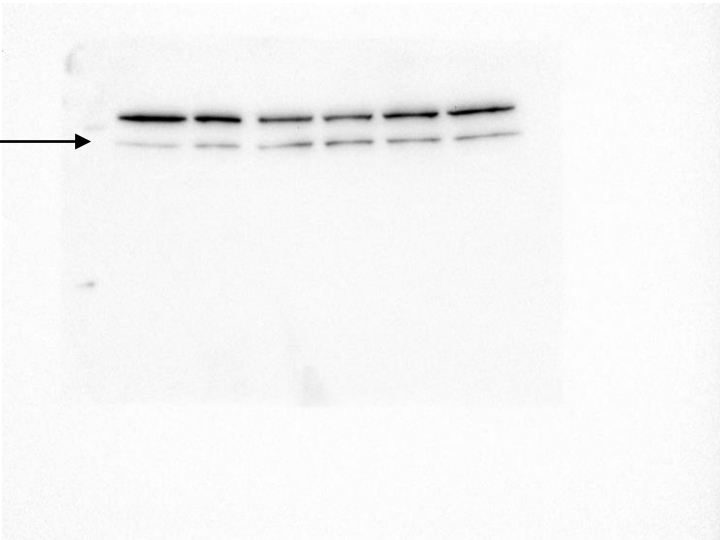

6

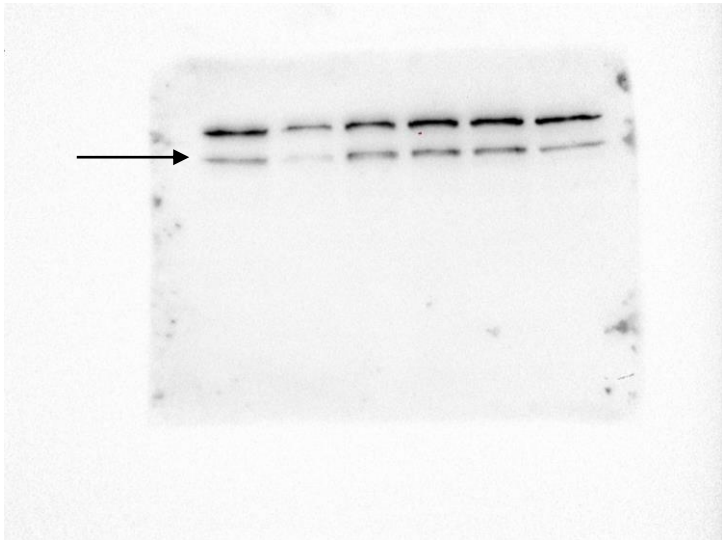

LC3B - Ponceau S

Samples order from the molecular weight marker: MTX | DOX18 | CTRL | DOX9-1 | CTRL-2 | DOX9-2

Other study

1

2

3

4

5

6

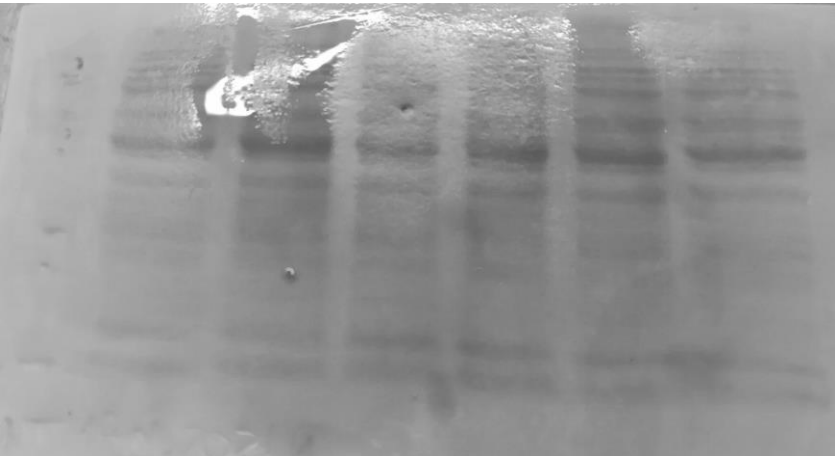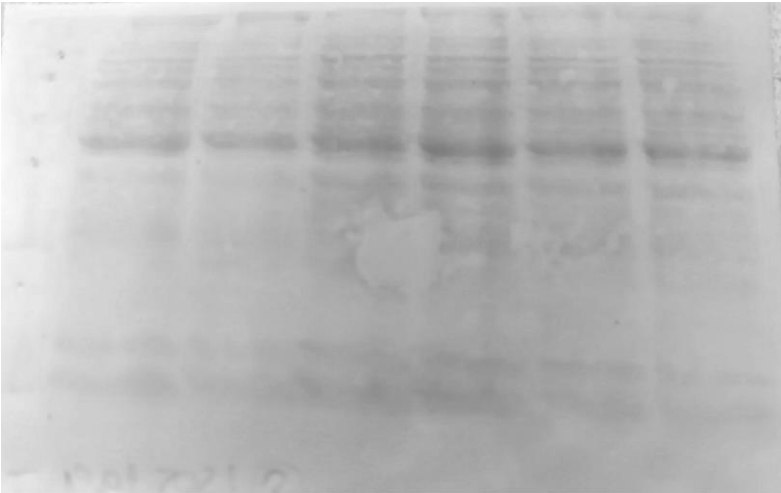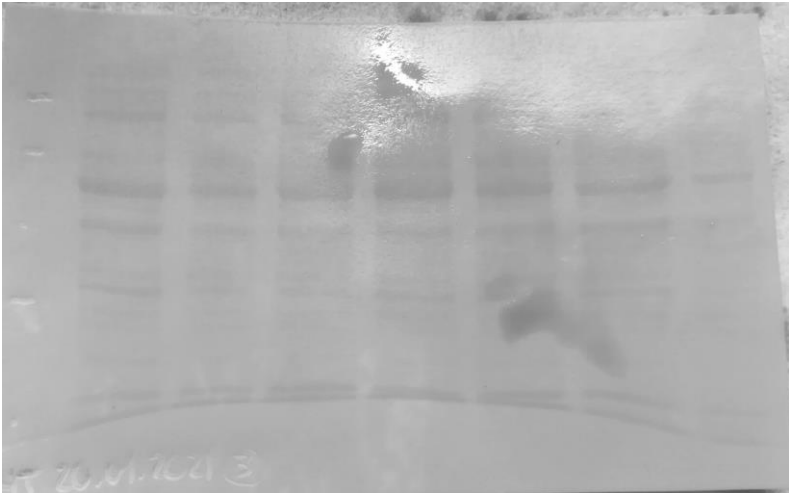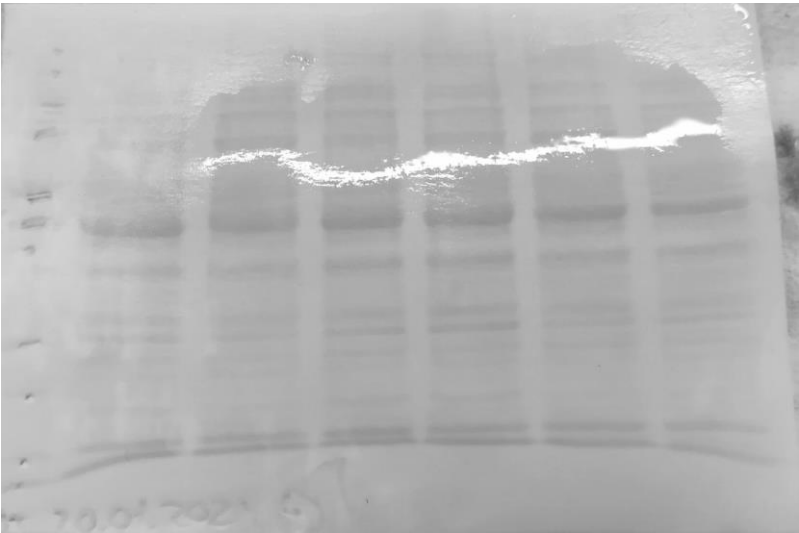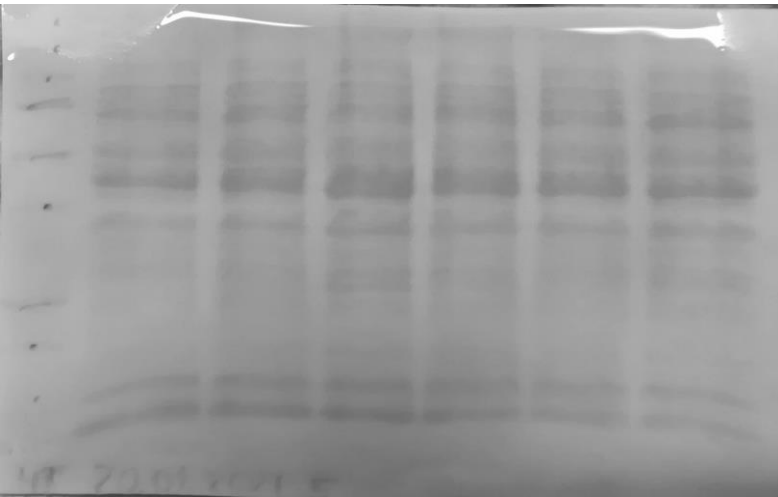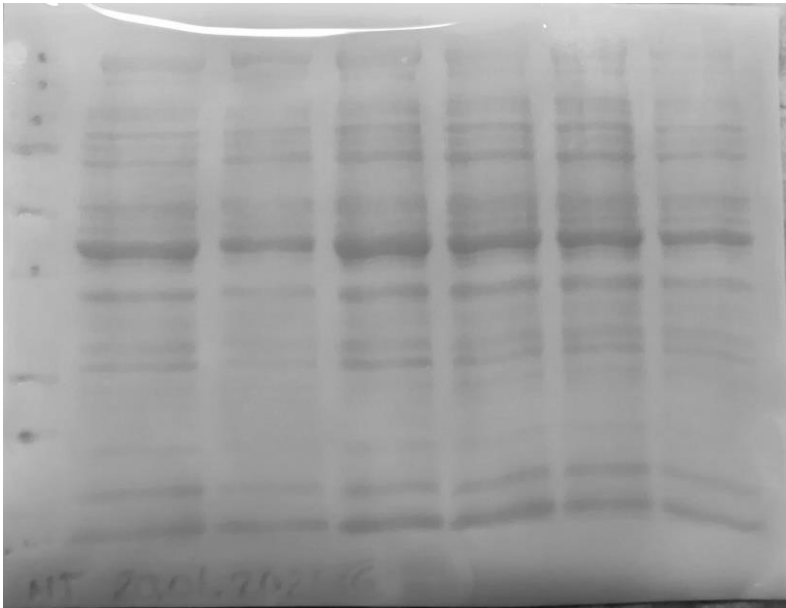



LC3B - Blot

Samples order from the molecular weight marker: MTX | DOX18 | CTRL | DOX9-1 | CTRL-2 | DOX9-2  
Other study

1

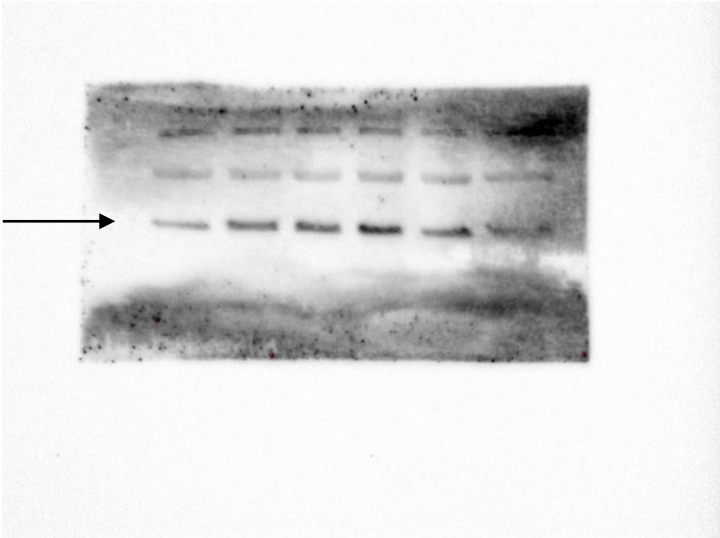

2

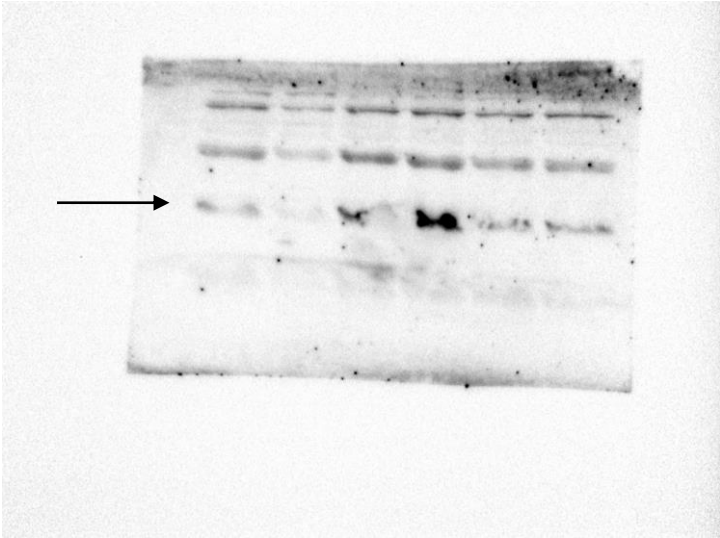

3

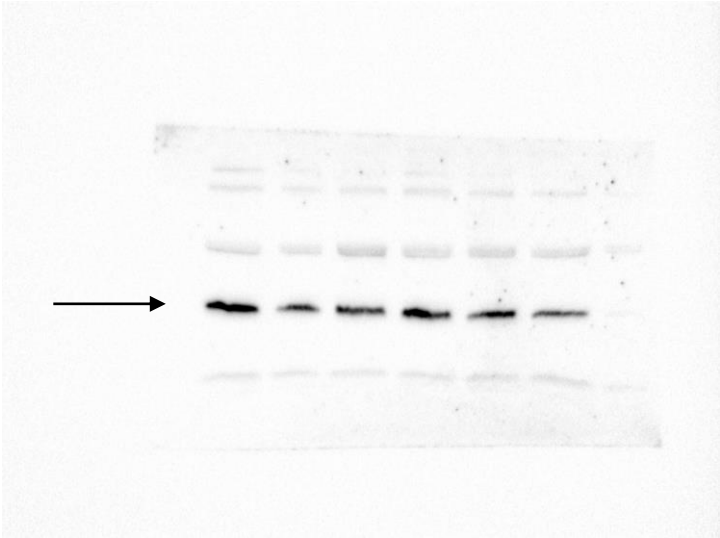

4

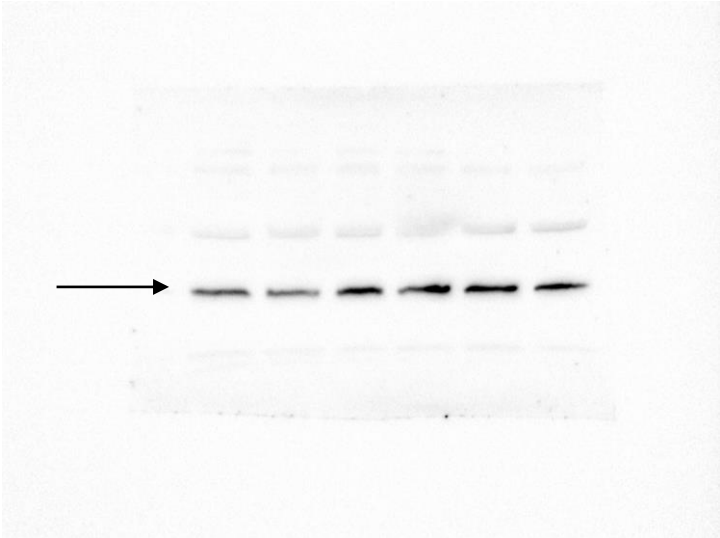

5

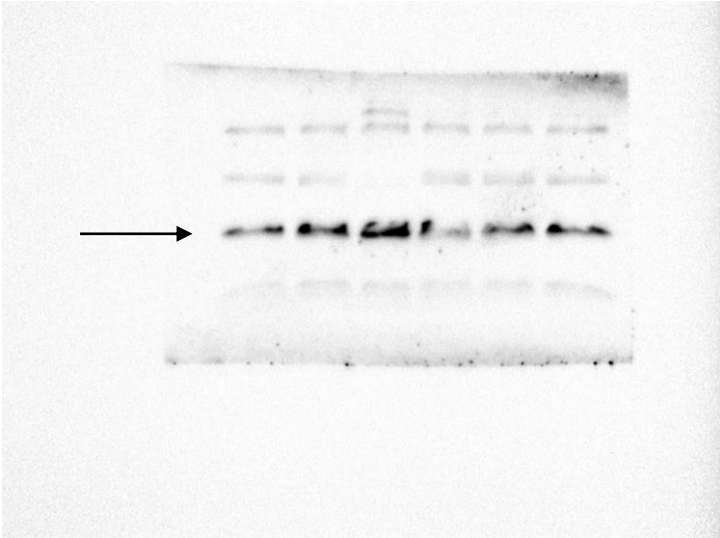

6

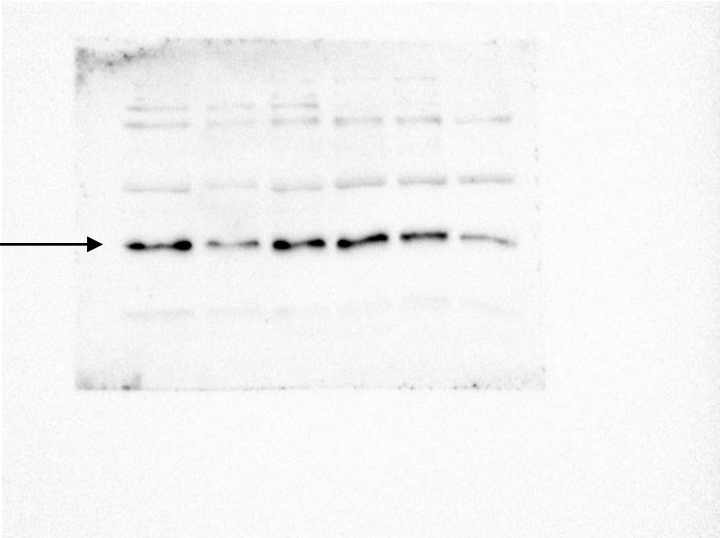

Parkin - Ponceau S

Samples order from the molecular weight marker: **MTX** | **DOX18** | **CTRL** | DOX9-1 | CTRL-2 | DOX9-2

This study

Other study

1

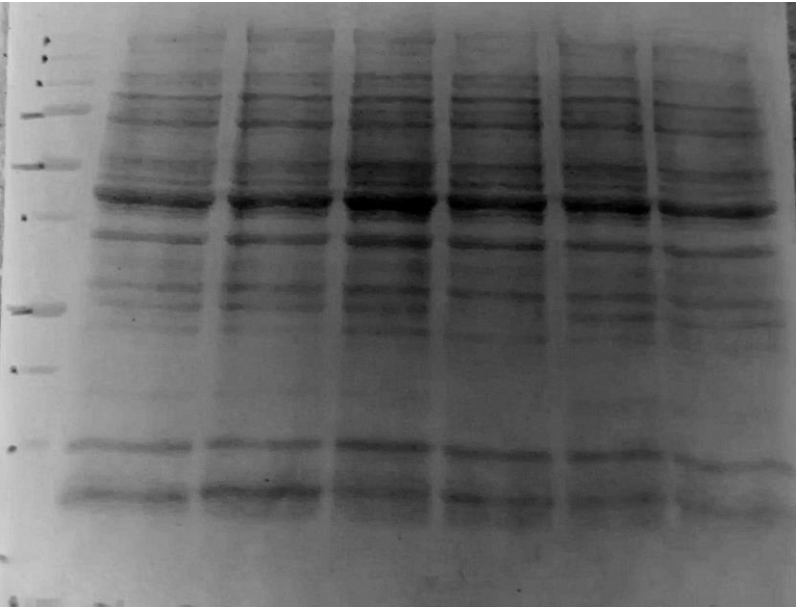

2

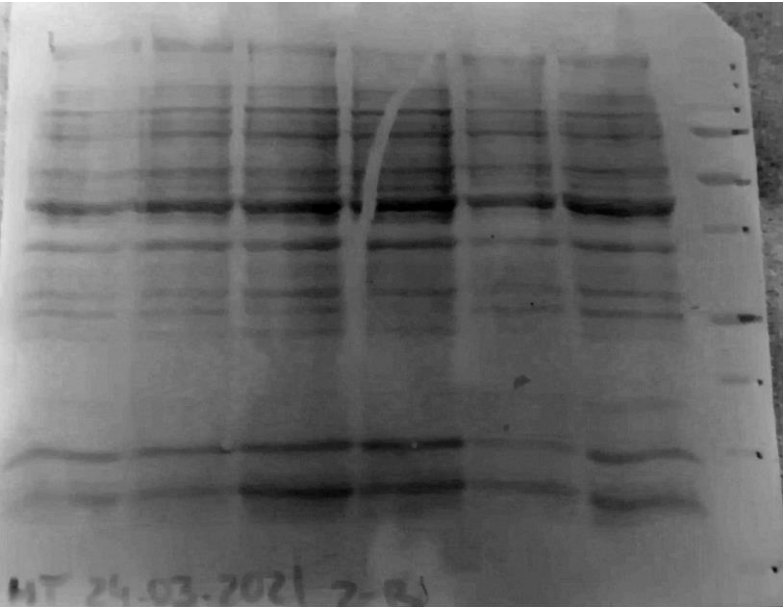

3

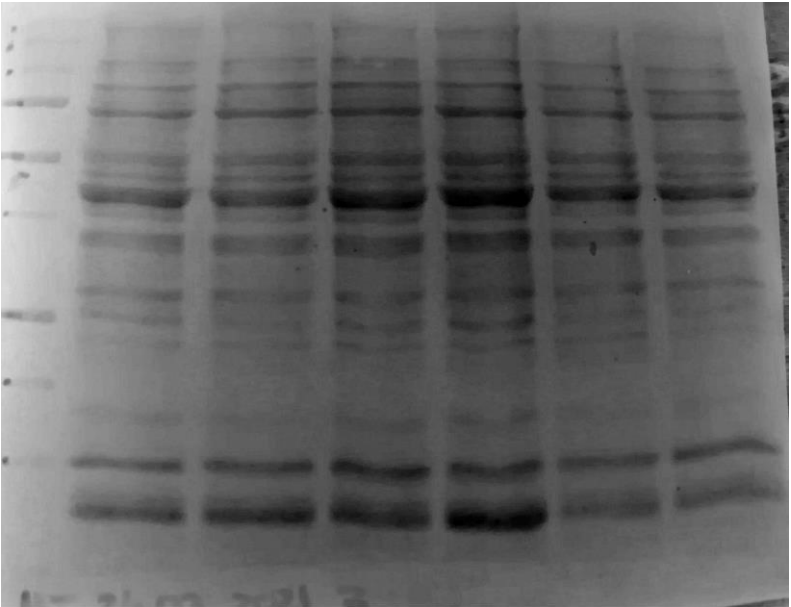

4

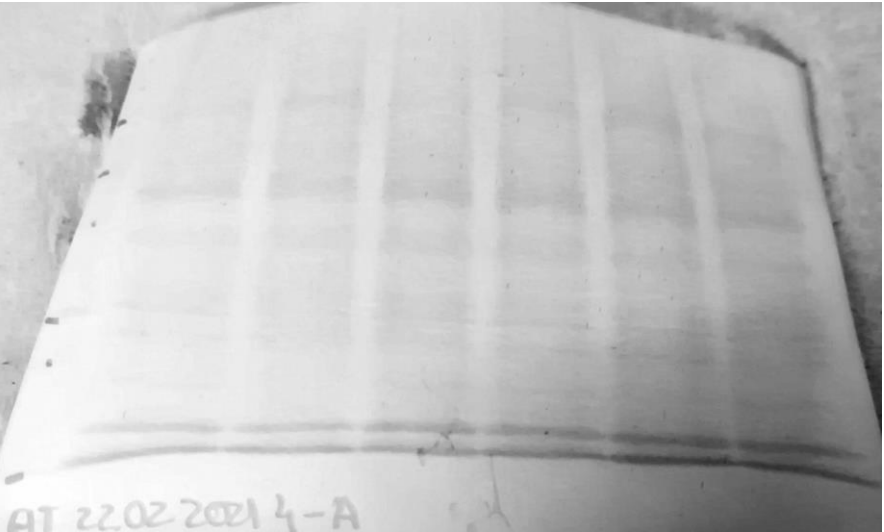

5

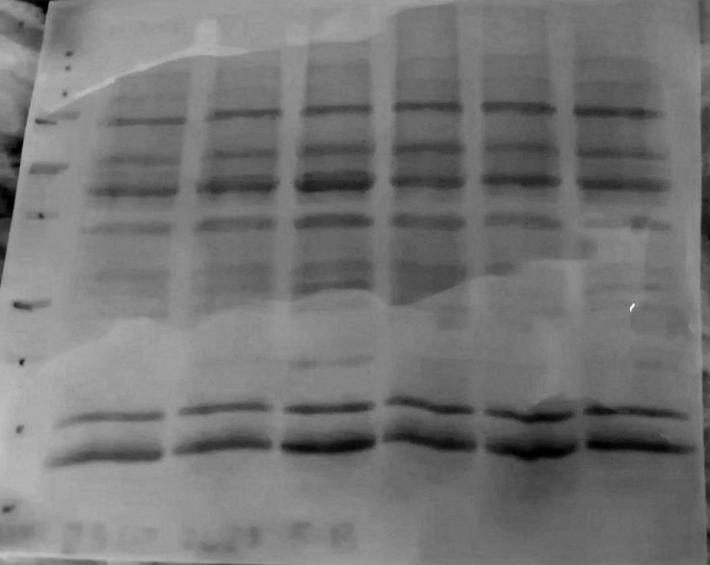

6

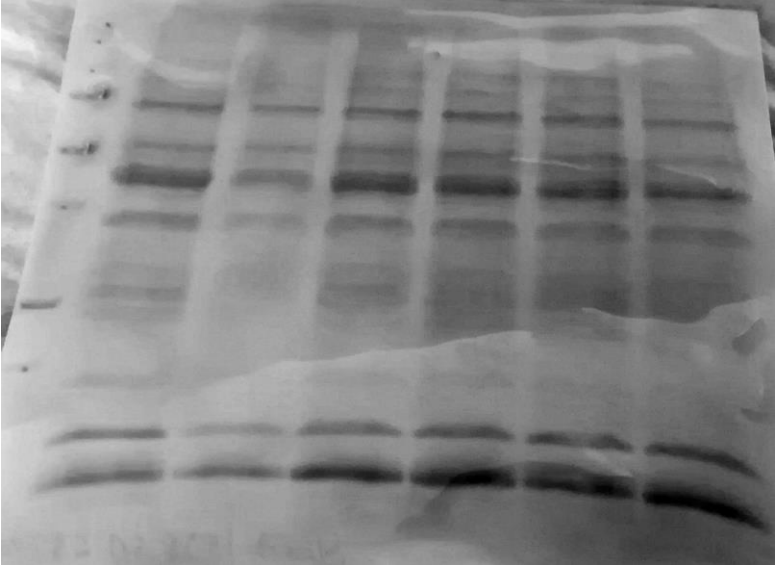

Parkin - Blot

Samples order from the molecular weight marker: MTX | DOX18 | CTRL | DOX9-1 | CTRL-2 | DOX9-2  
Other study

1

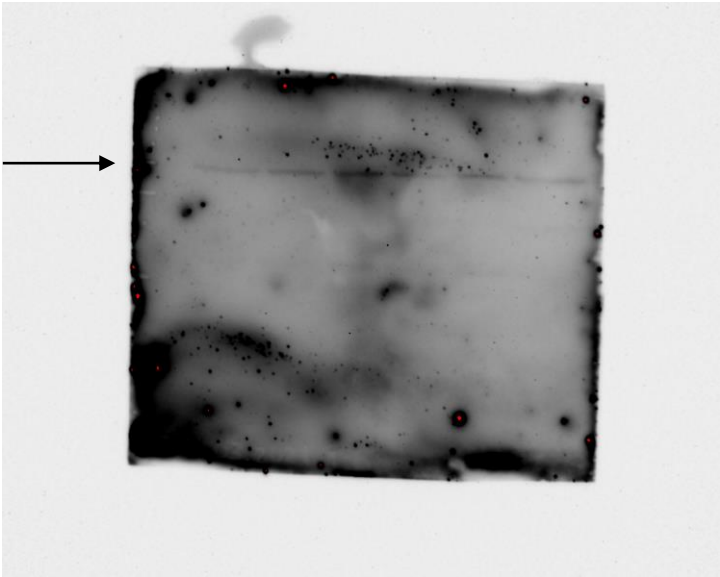

2

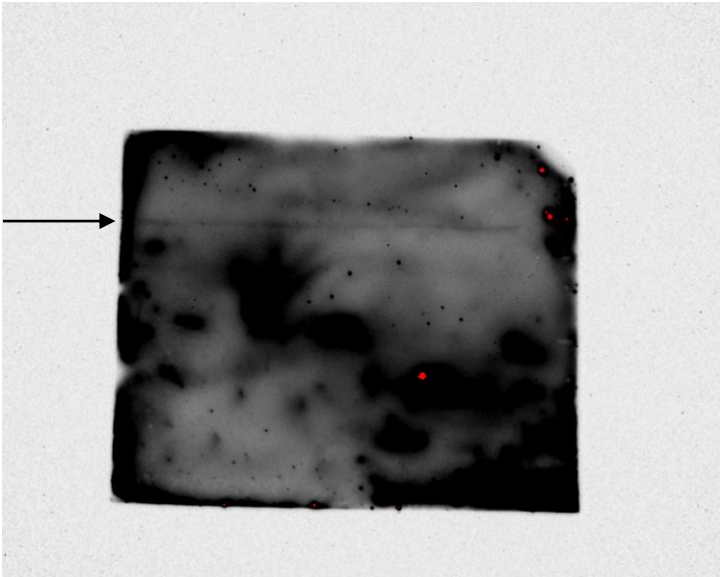

3

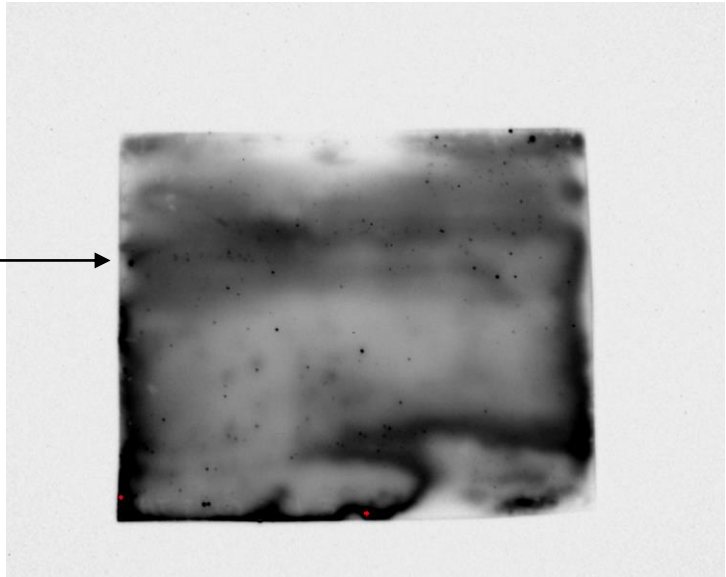

4

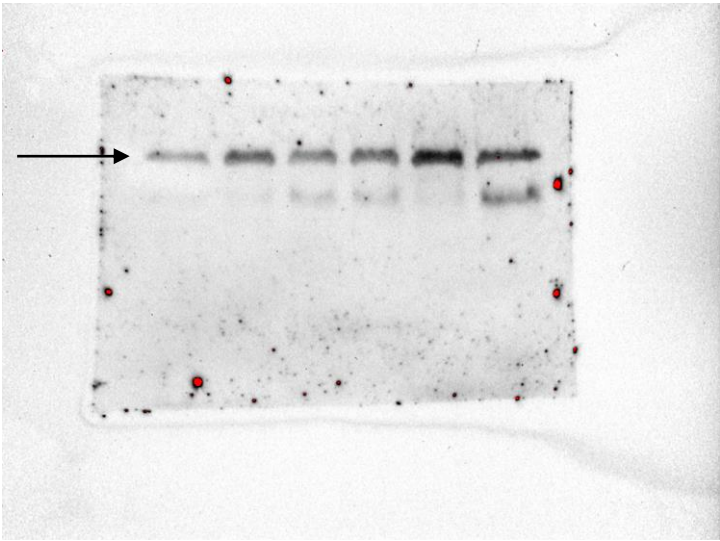

5

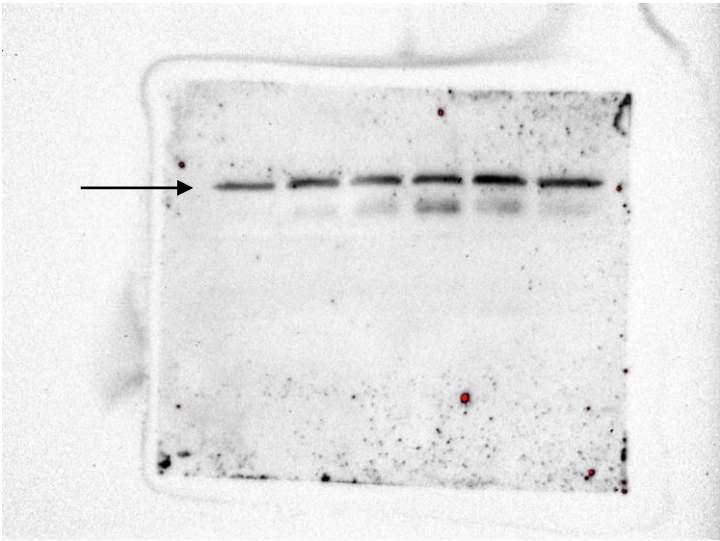

6

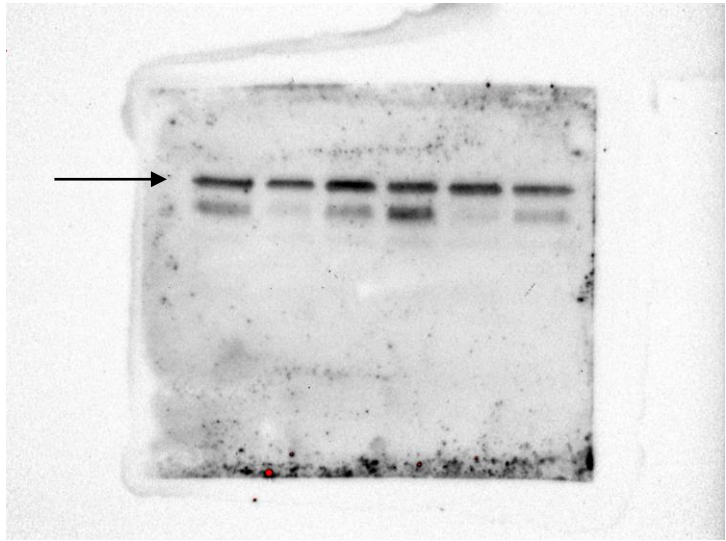



BNIP3 - Ponceau S

Samples order from the molecular weight marker: This study **MTX | DOX18 | CTRL | DOX9-1 | CTRL-2 | DOX9-2** Other study

1

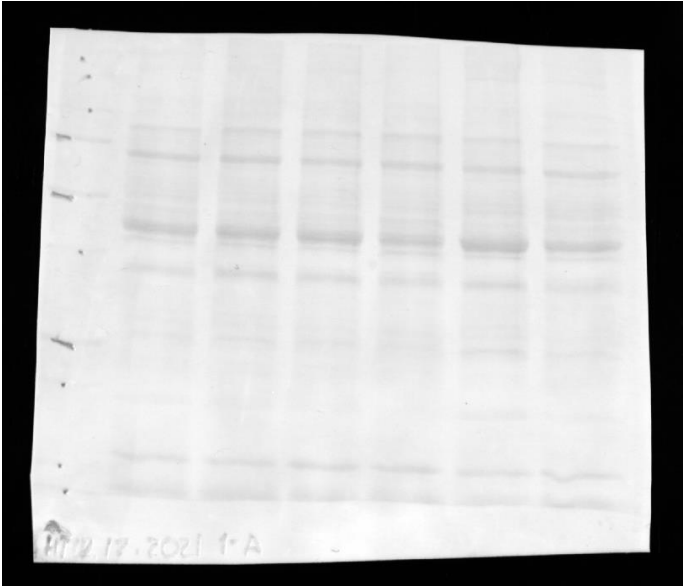

2

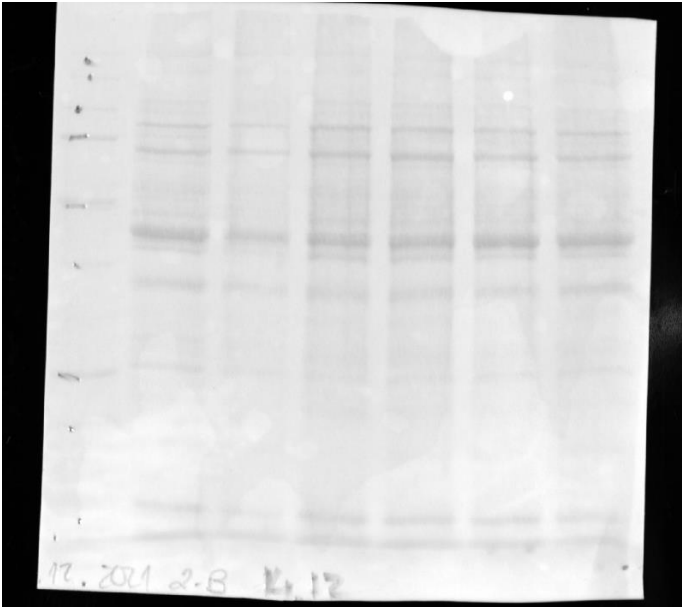

3

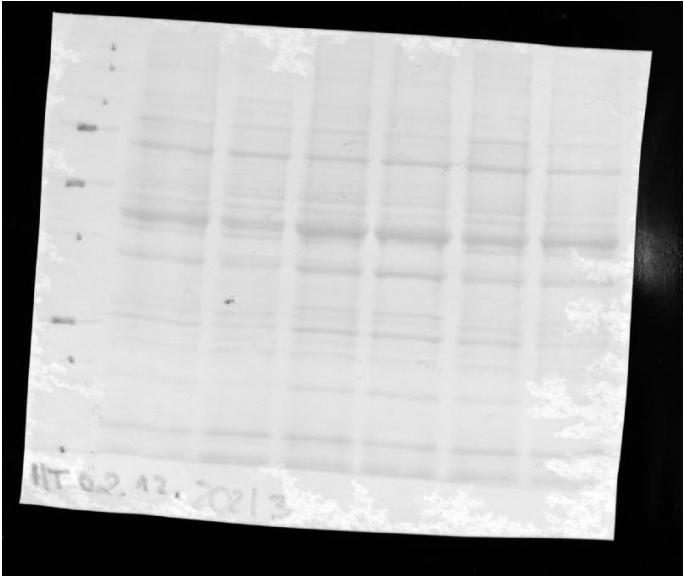

4

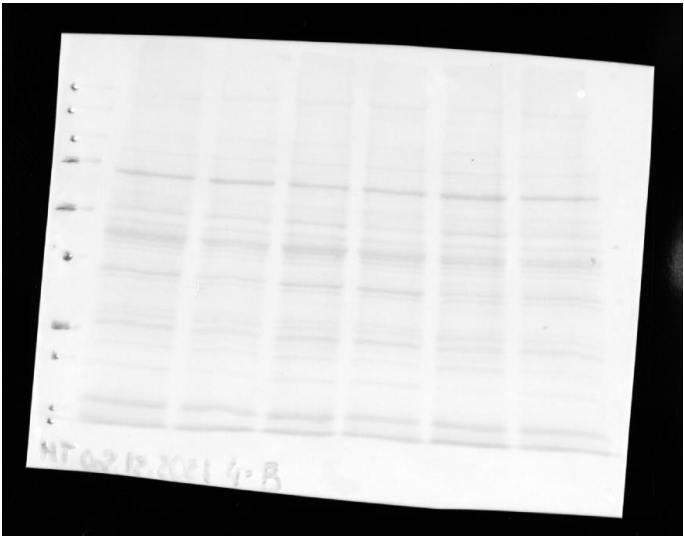

5

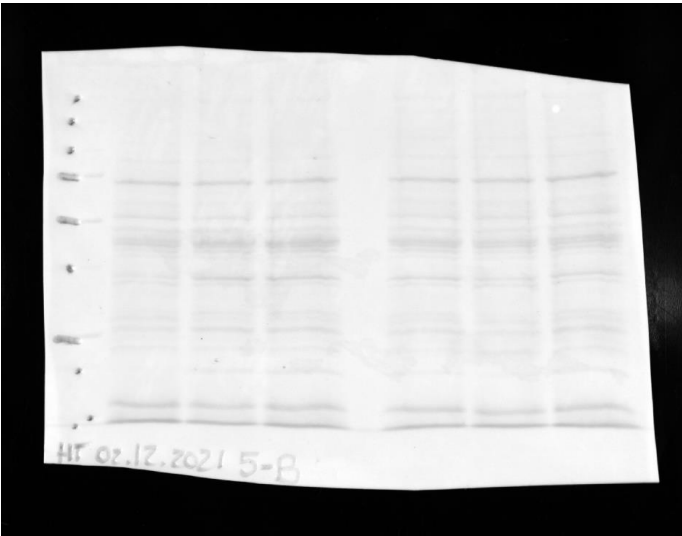

6

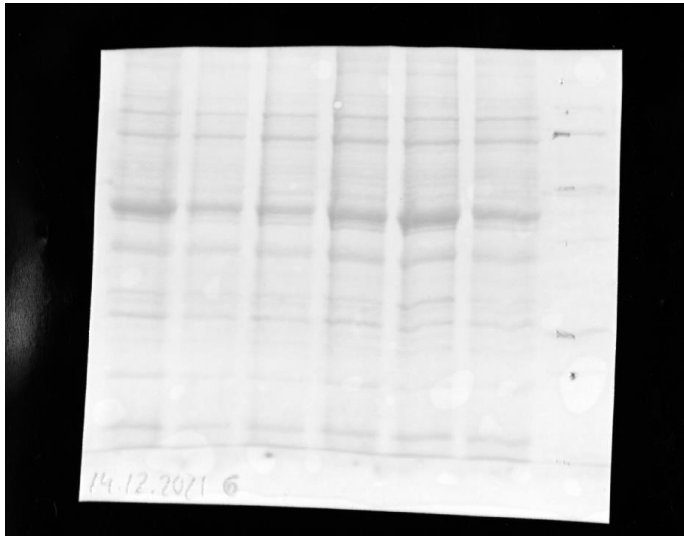



BNIP3 - Blot

Samples order from the molecular weight marker: **MTX** | **DOX18** | **CTRL** | DOX9-1 | CTRL-2 | DOX9-2

This study

Other study

Other study

1

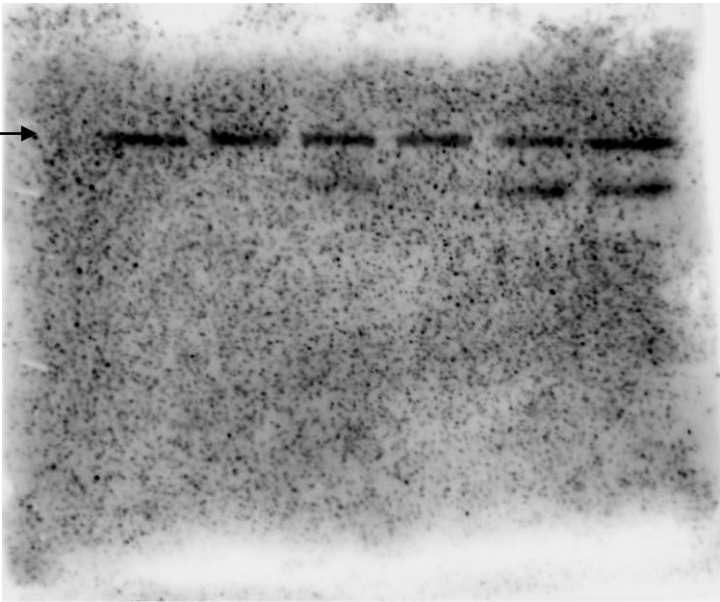

2

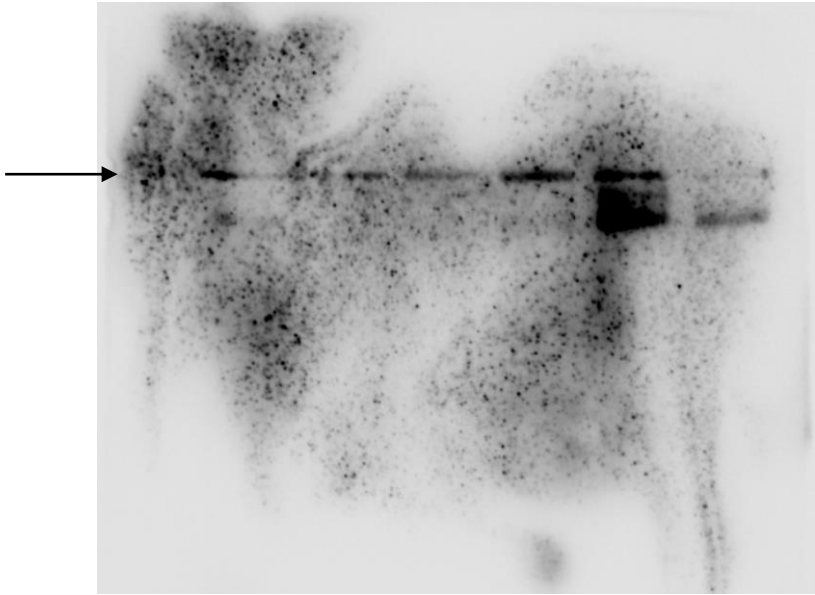

3

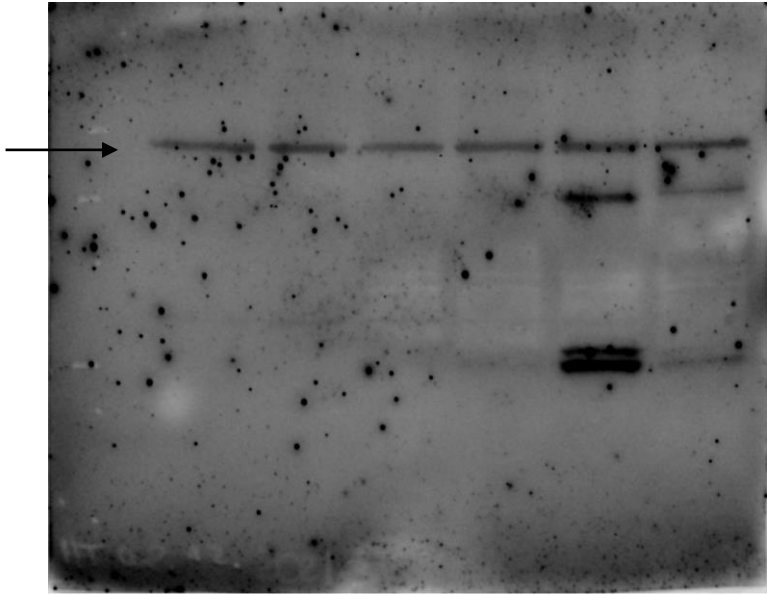

4

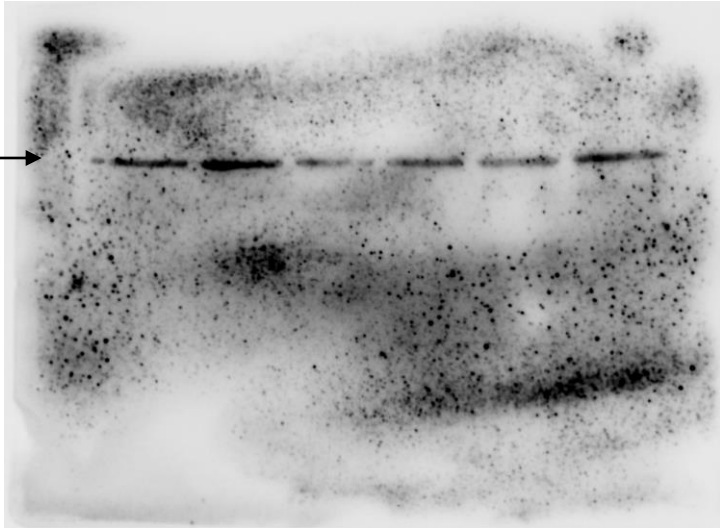

5

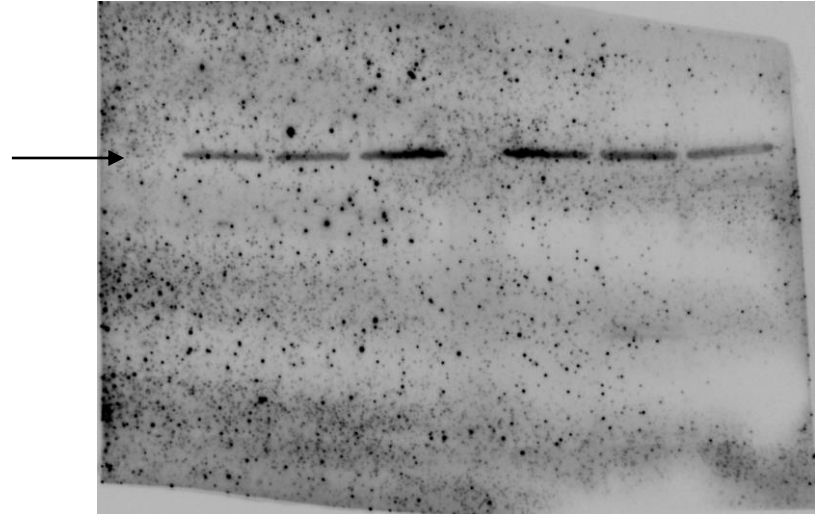

6

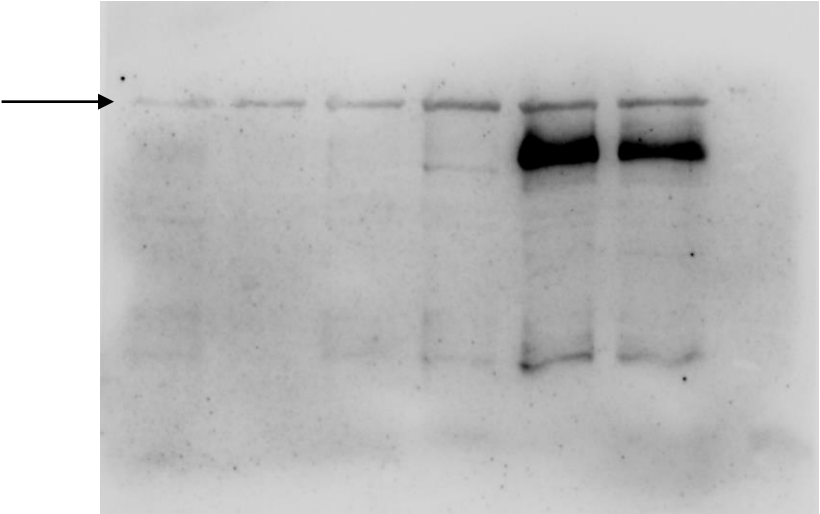

BAX - Ponceau S

Samples order from the molecular weight marker: MTX | DOX18 | CTRL | DOX9-1 | CTRL-2 | DOX9-2  
Other study

1

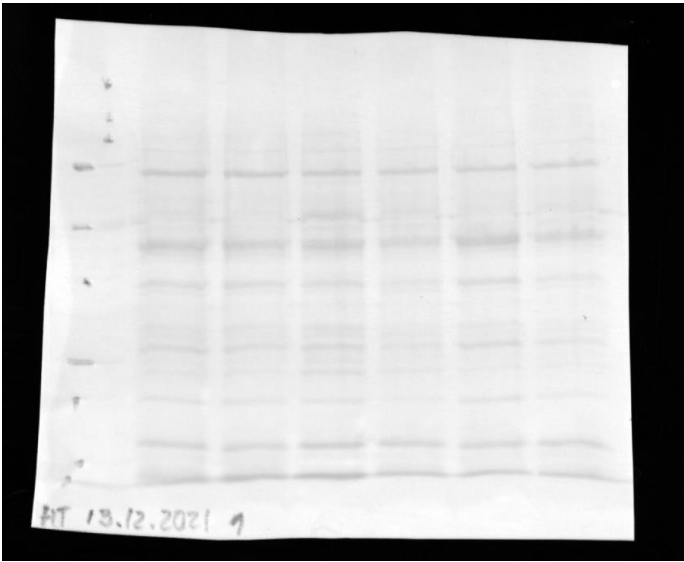

2

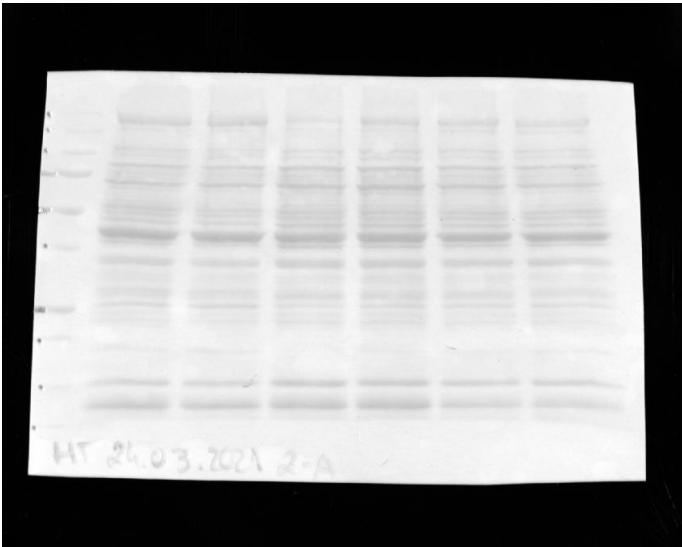

3

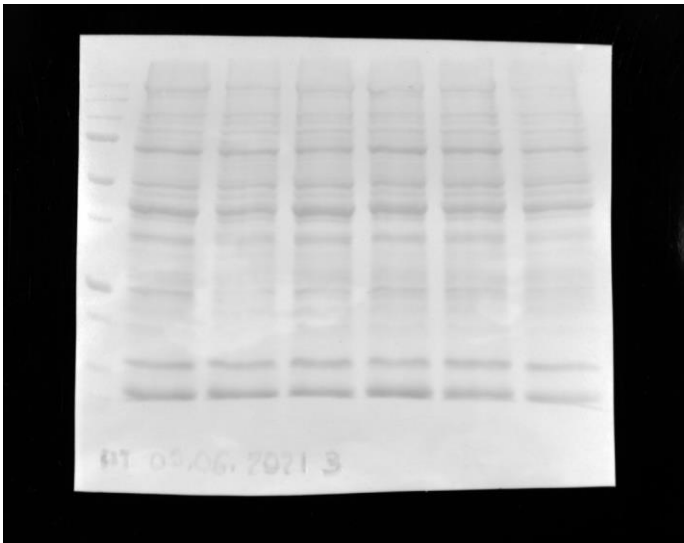

4

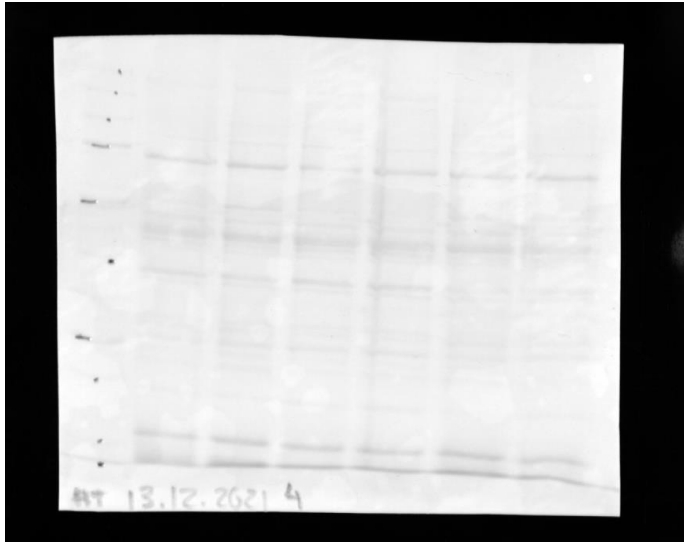

5

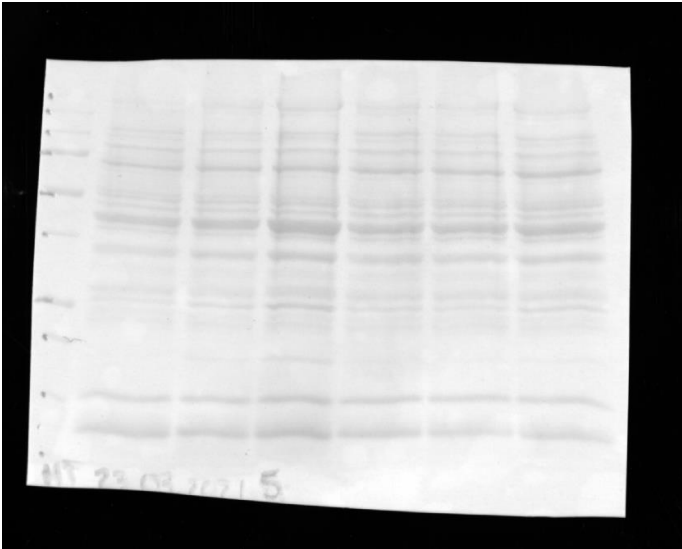

6

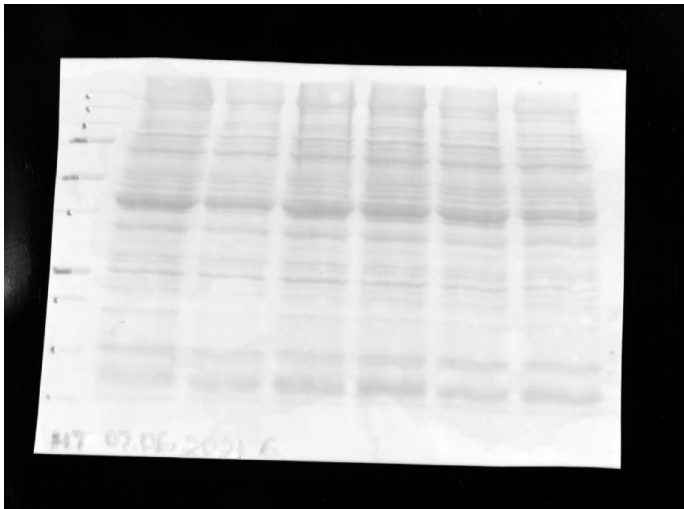

BAX - Blot

Samples order from the molecular weight marker: **MTX** | **DOX18** | **CTRL** | DOX9-1 | CTRL-2 | DOX9-2

This study

CTRL | DOX9-1 | CTRL-2 | DOX9-2

Other study

1

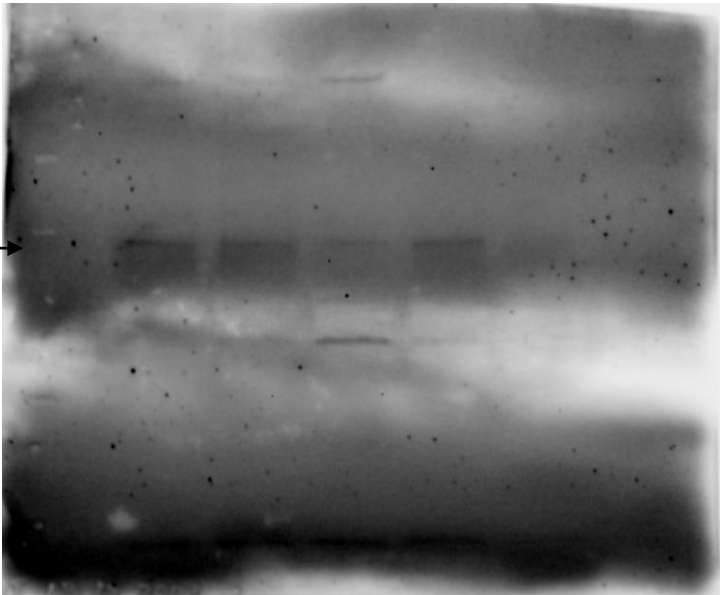

2

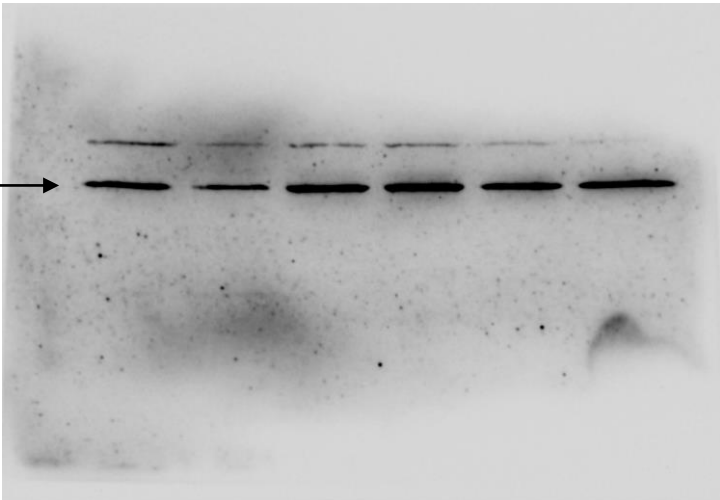

3

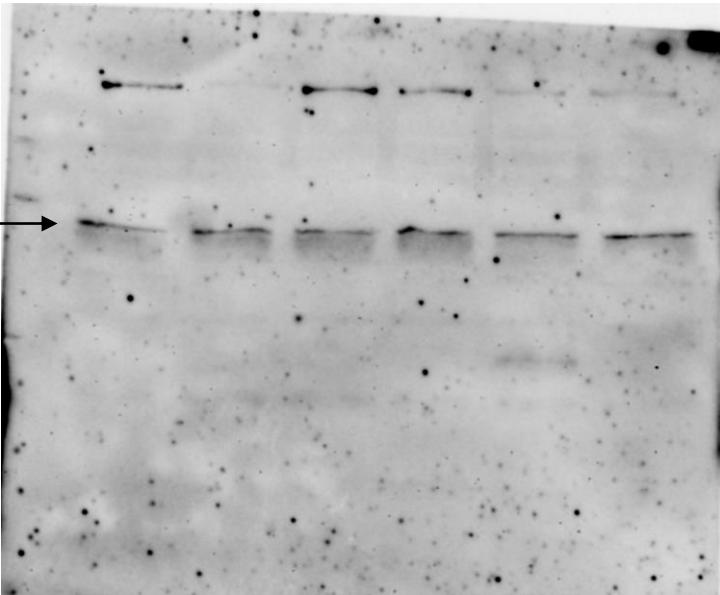

4

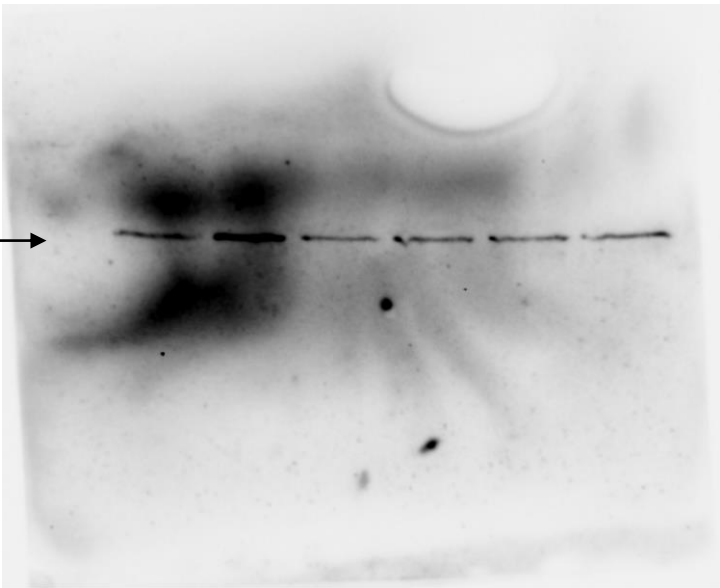

5

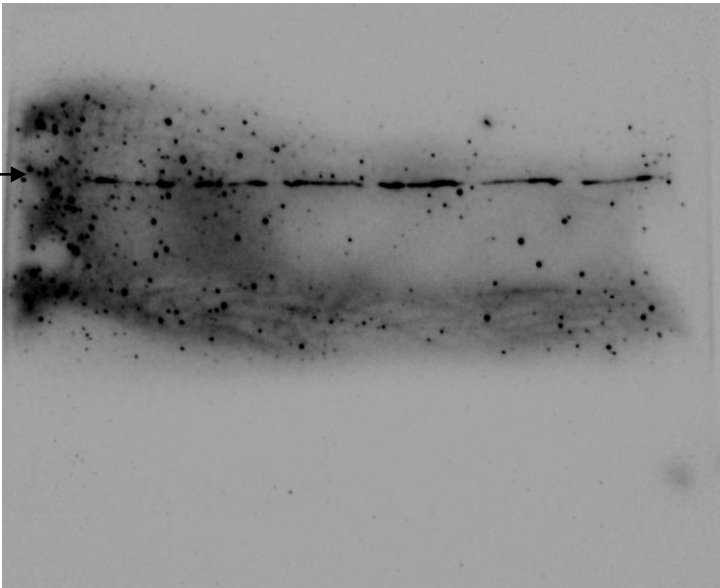

6

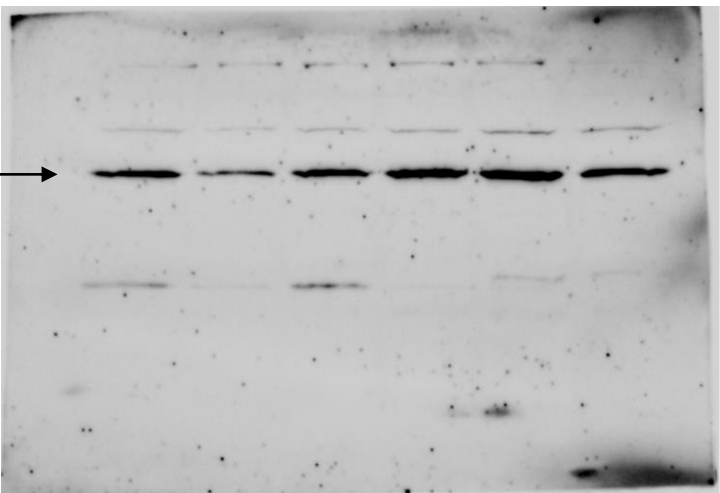

BCL2 - Ponceau S

Samples order from the molecular weight marker: This study **MTX | DOX18 | CTRL | DOX9-1 | CTRL-2 | DOX9-2** Other study

1

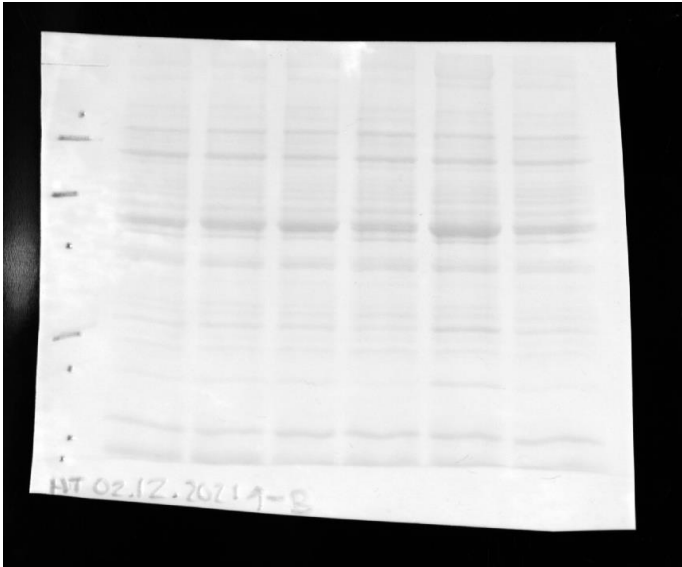

2

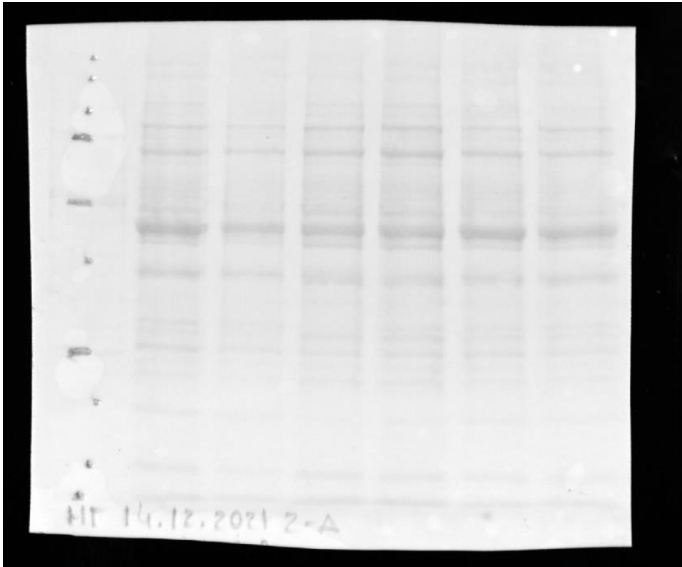

3

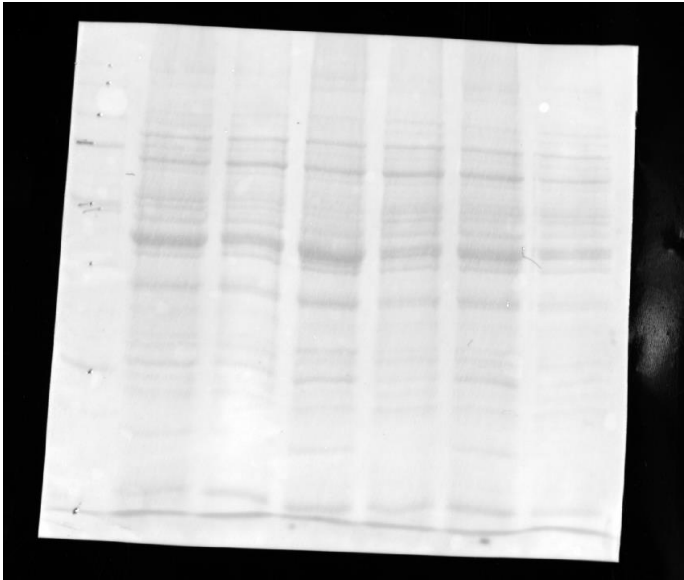

4

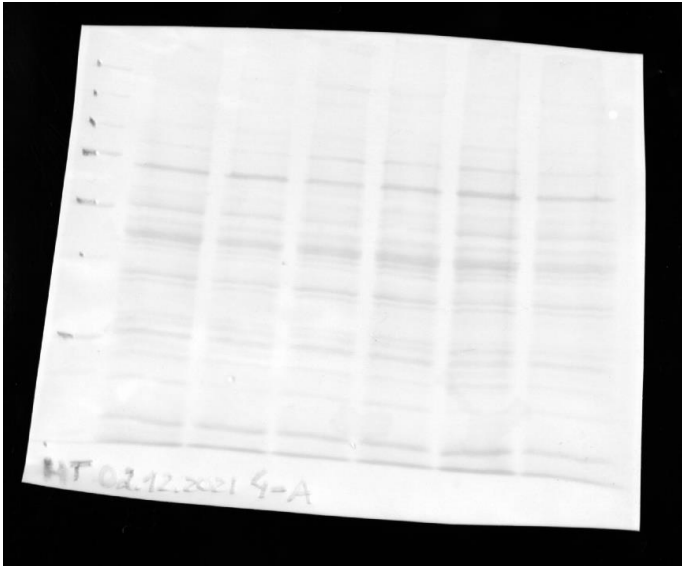

5

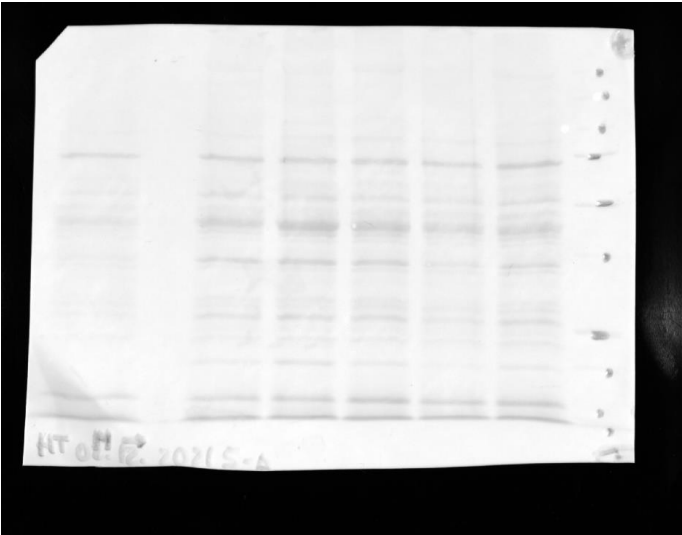

6

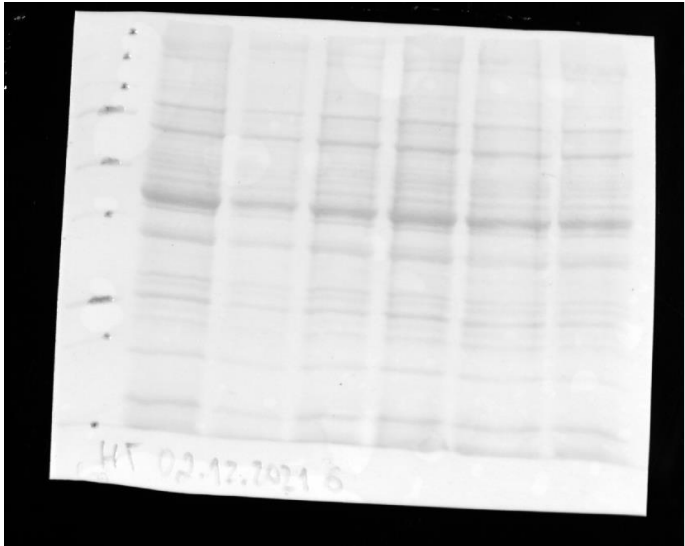



BCL2 - Blot

Samples order from the molecular weight marker: **MTX** | **DOX18** | **CTRL** | DOX9-1 | CTRL-2 | DOX9-2

This study

DOX9-1 | CTRL-2 | DOX9-2

Other study

1

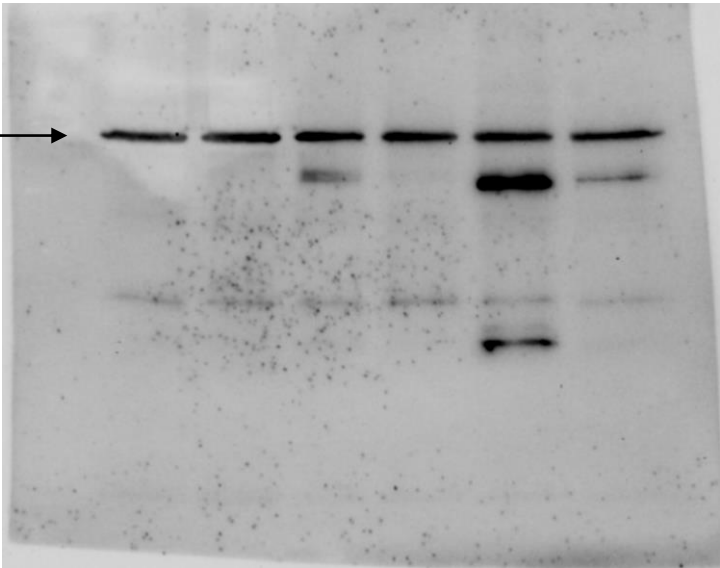

2

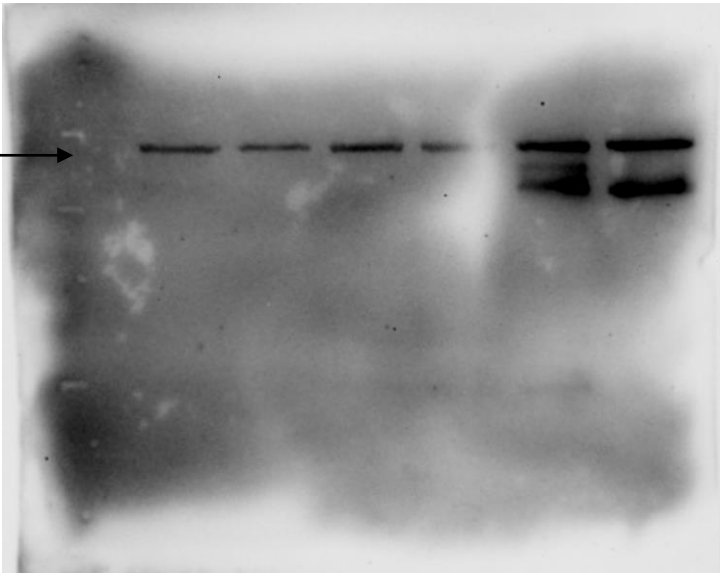

3

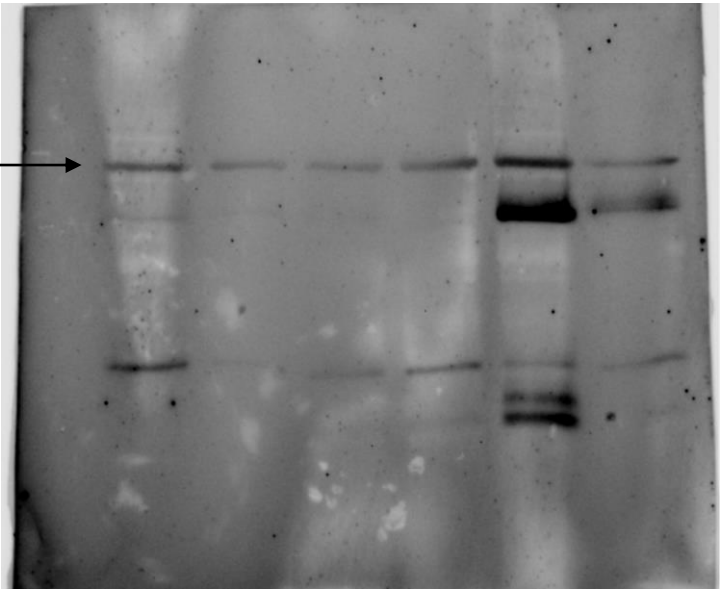

4

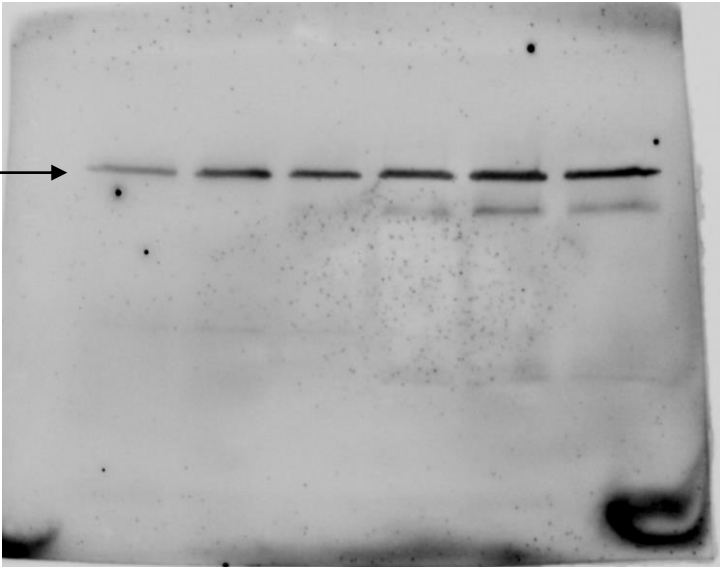

5

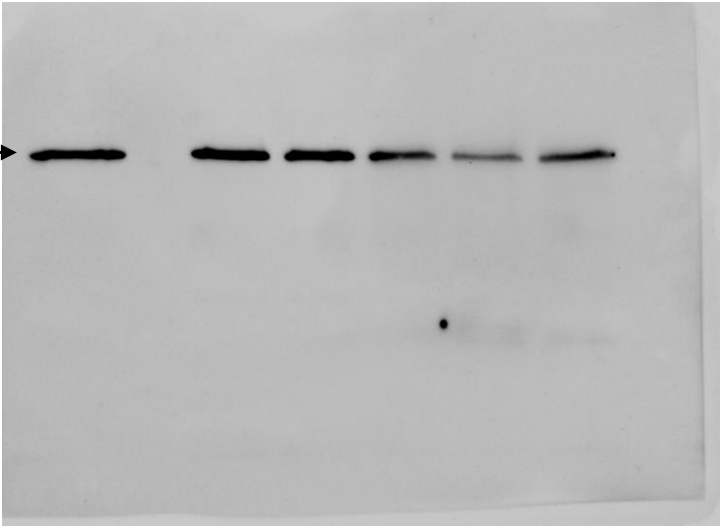

6

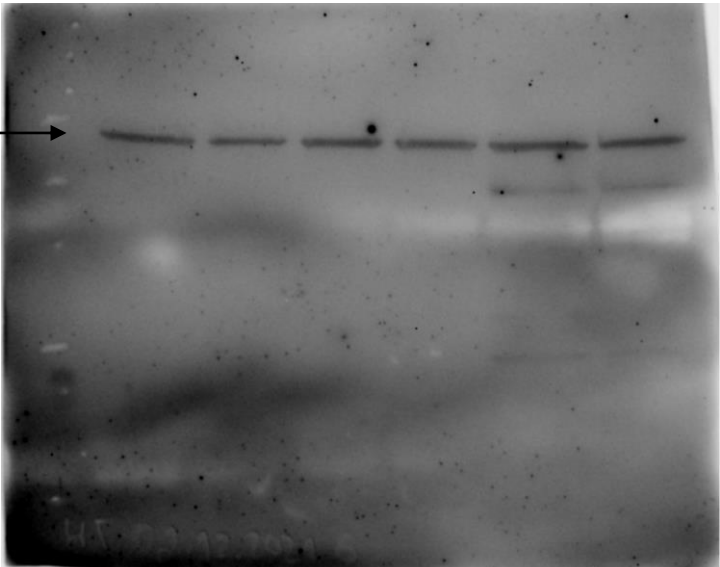

HSP27 - Ponceau S

Samples order from the molecular weight marker: **MTX** | **DOX18** | **CTRL** | DOX9-1 | CTRL-2 | DOX9-2

This study

Other study

1

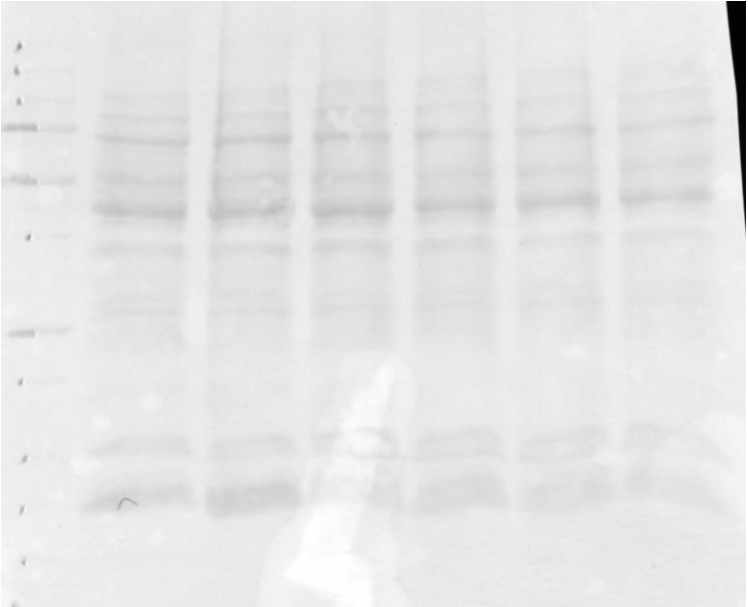

2

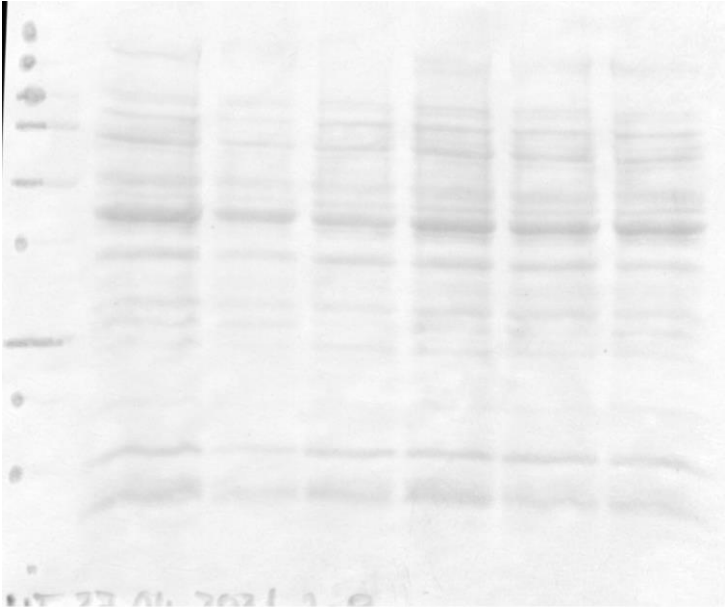

3

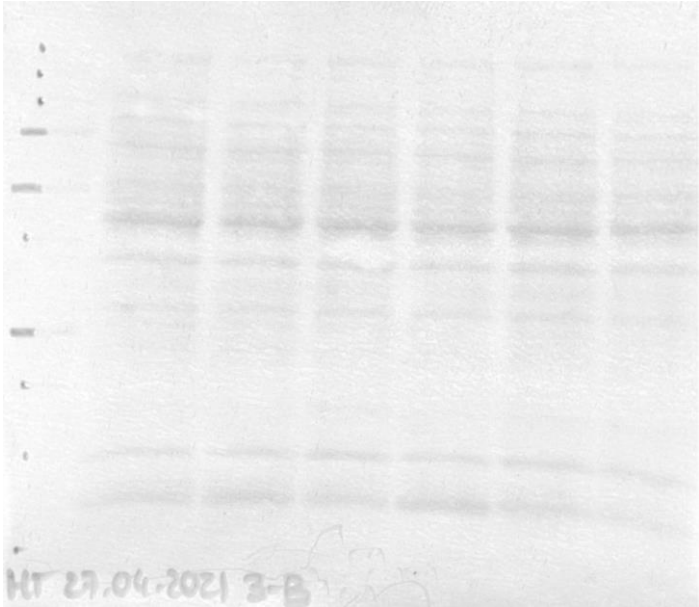

4

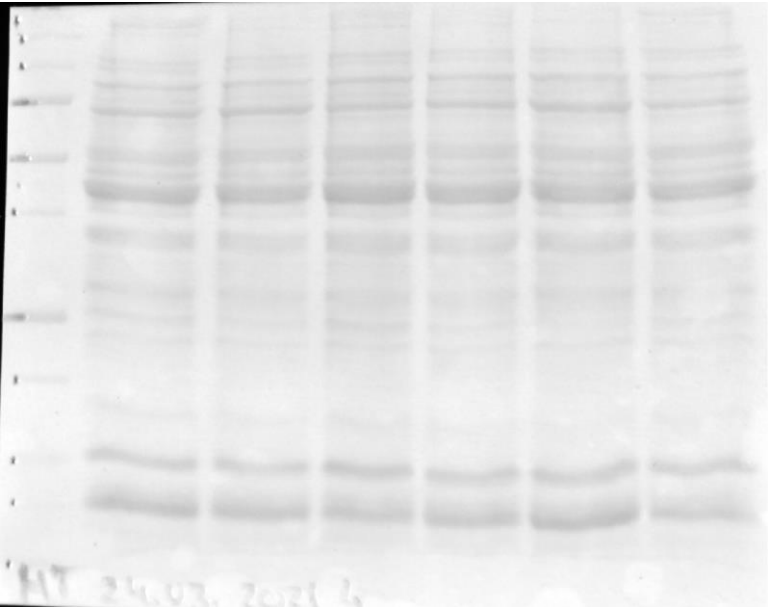

5

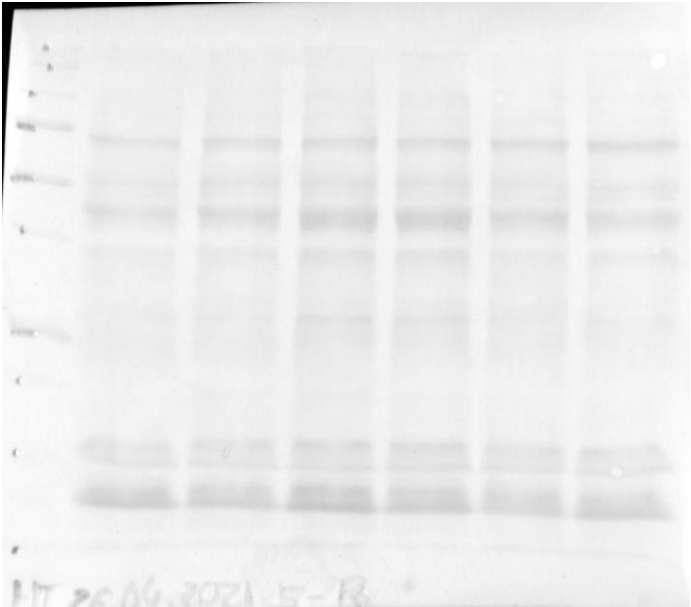

6

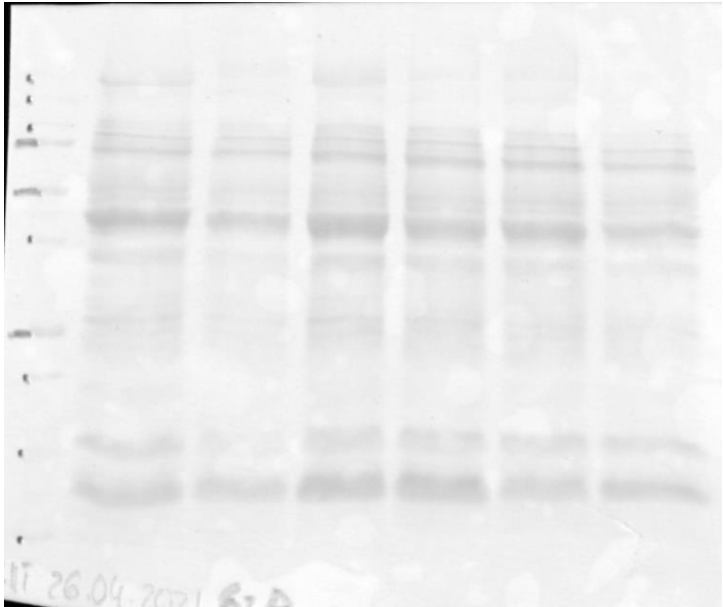

HSP27 - Blot

Samples order from the molecular weight marker: MTX | DOX18 | CTRL | DOX9-1 | CTRL-2 | DOX9-2  
Other study

1

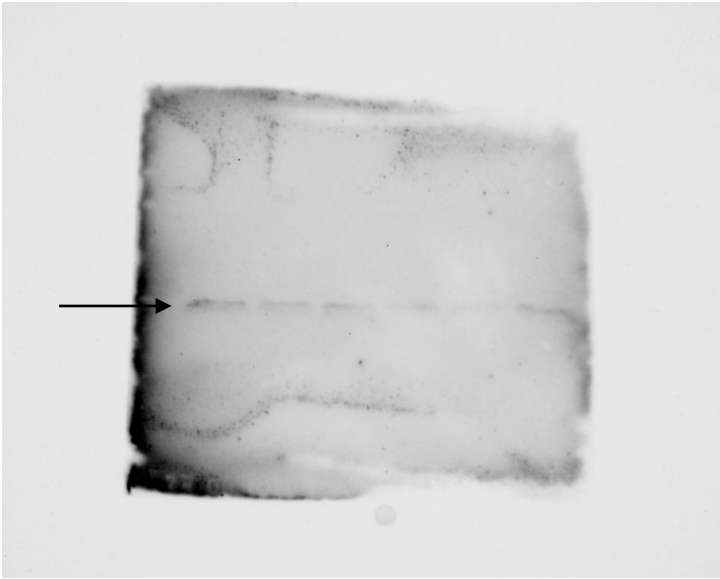

2

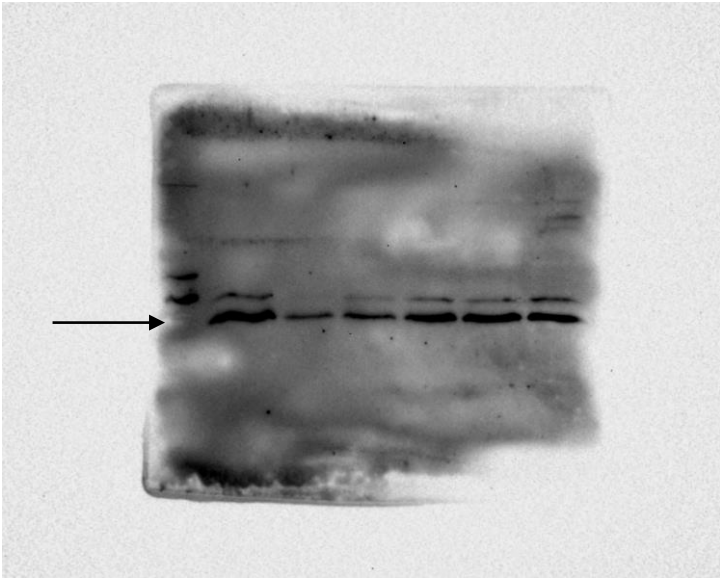

3

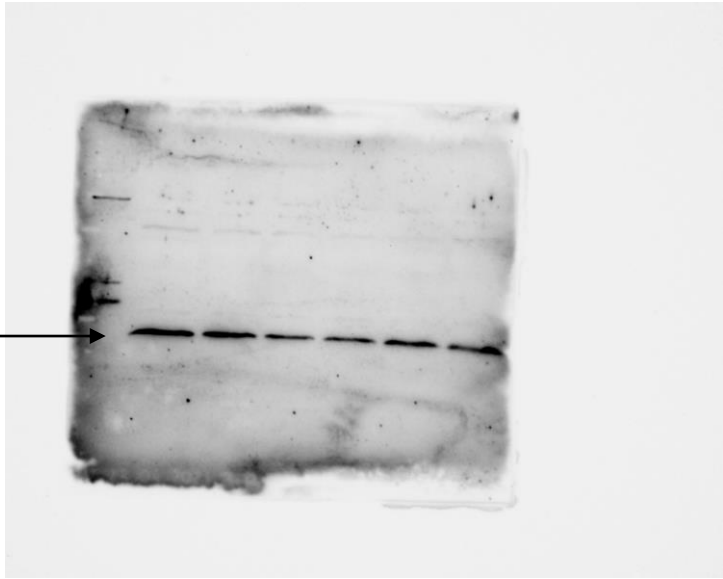

4

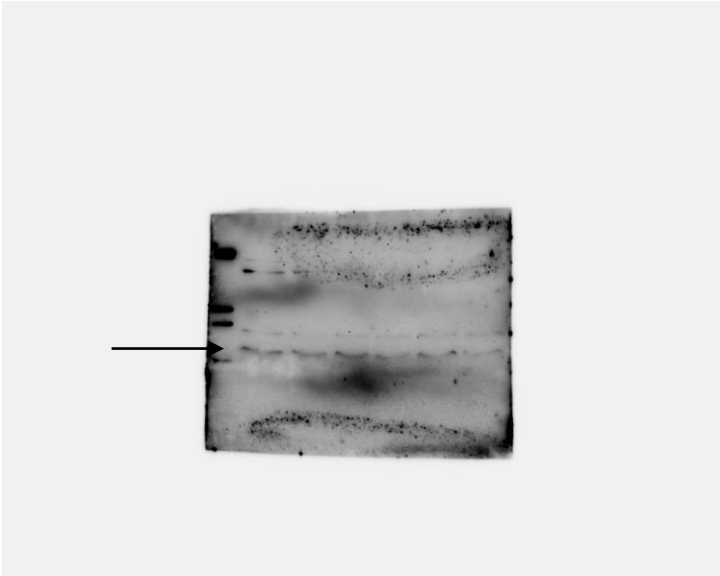

5

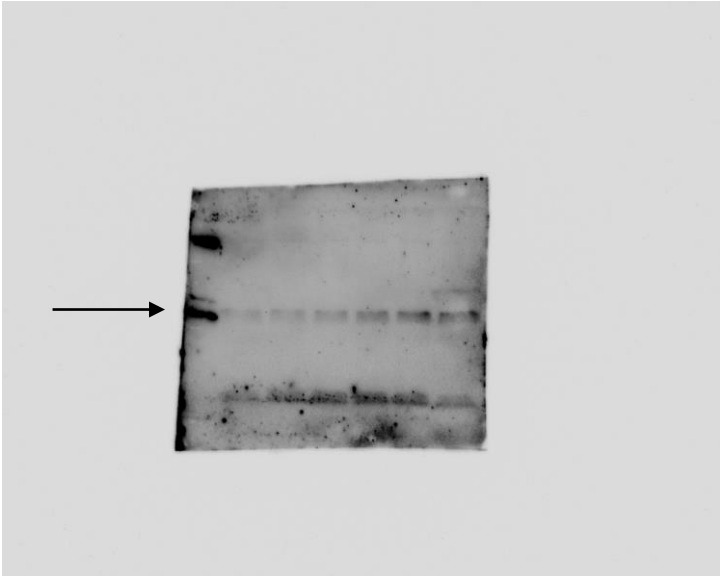

6

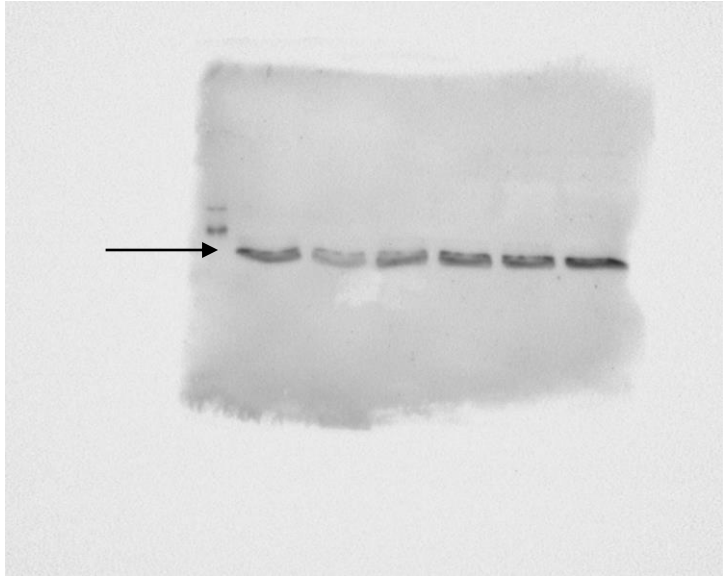

HSP70 - Ponceau S

Samples order from the molecular weight marker: **MTX** | **DOX18** | **CTRL** | DOX9-1 | CTRL-2 | DOX9-2

This study

Other study

1

2

3

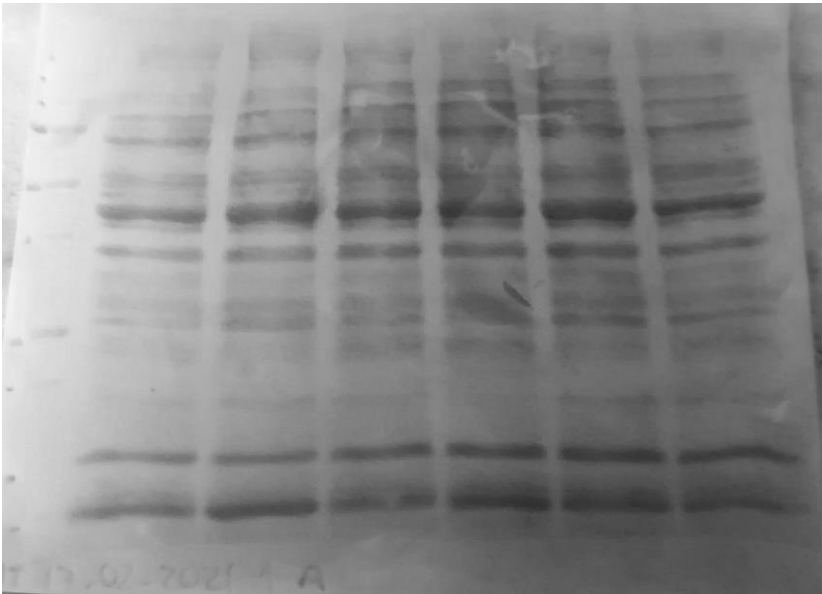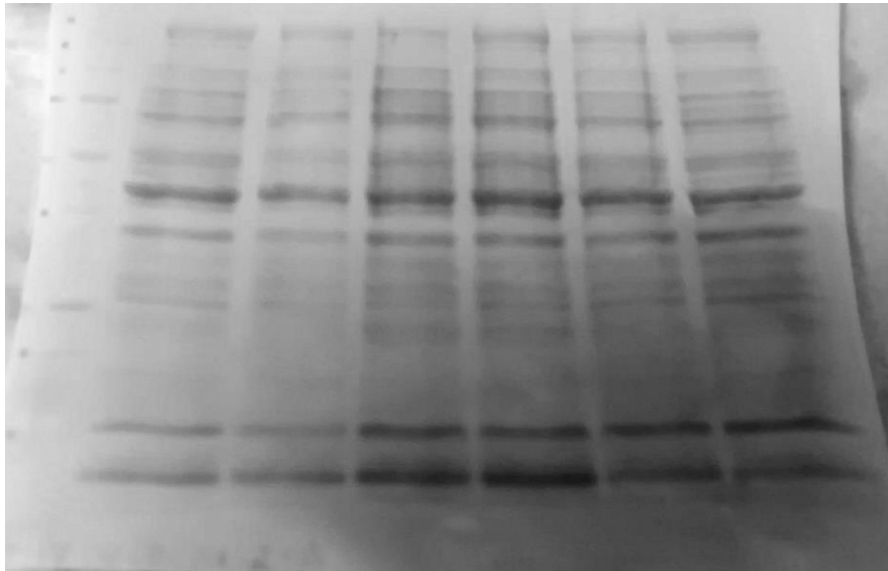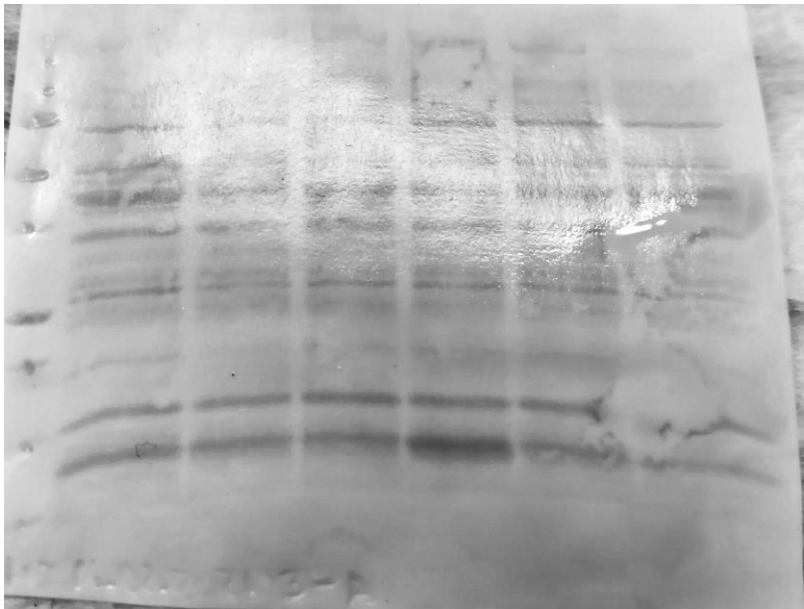

4

5

6

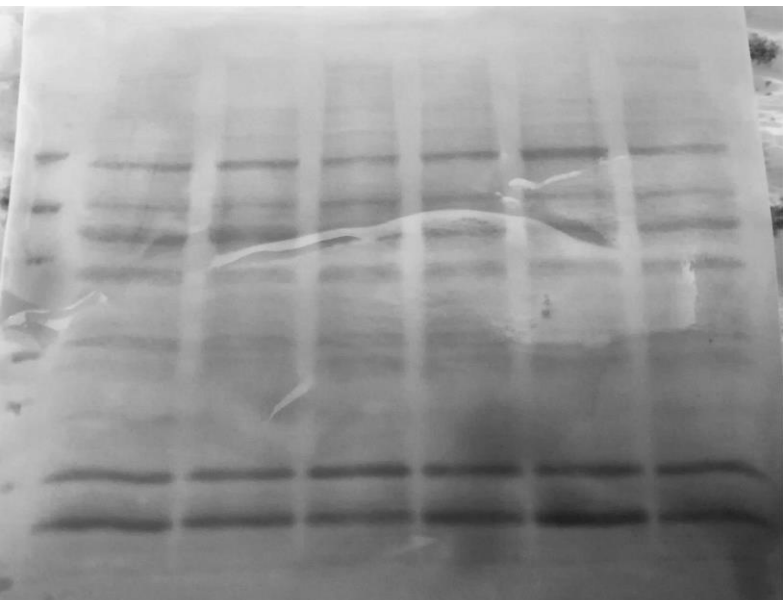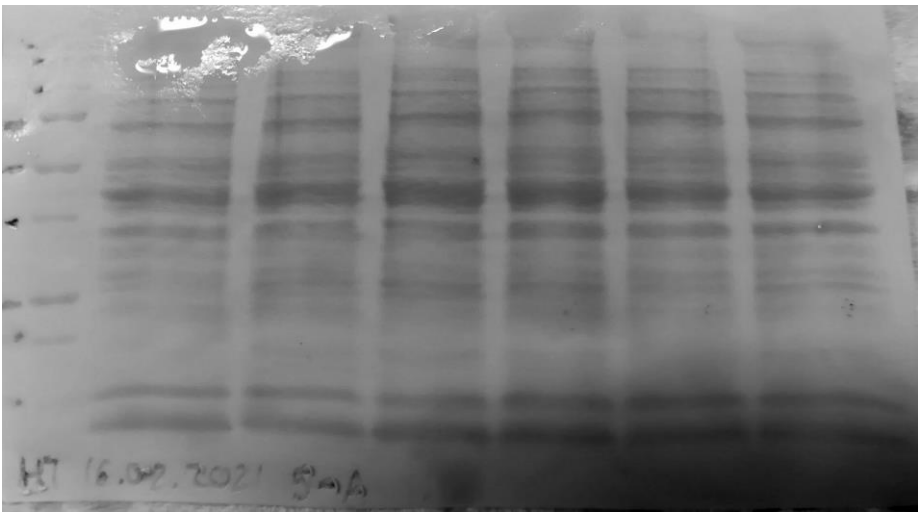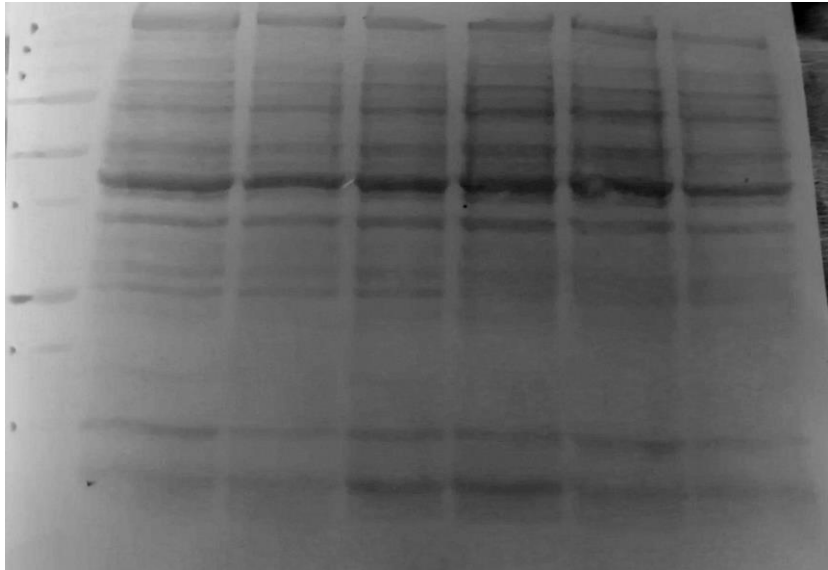



HSP70 - Blot

Samples order from the molecular weight marker: MTX | DOX18 | CTRL | DOX9-1 | CTRL-2 | DOX9-2

This study  
Other study

1

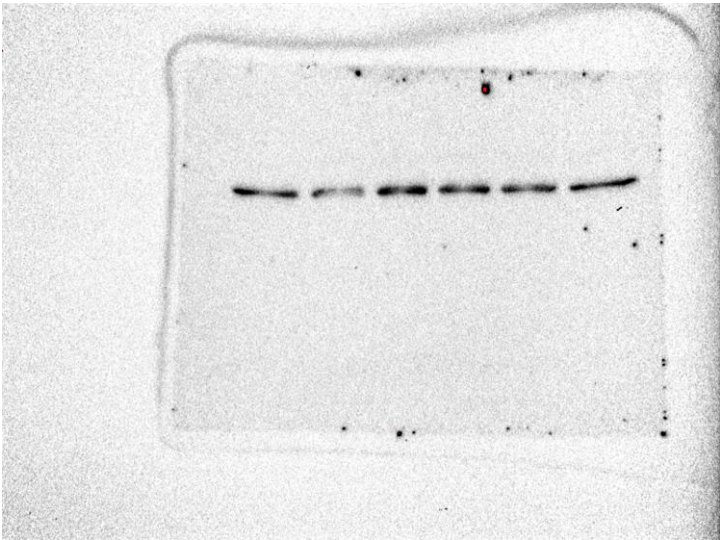

2

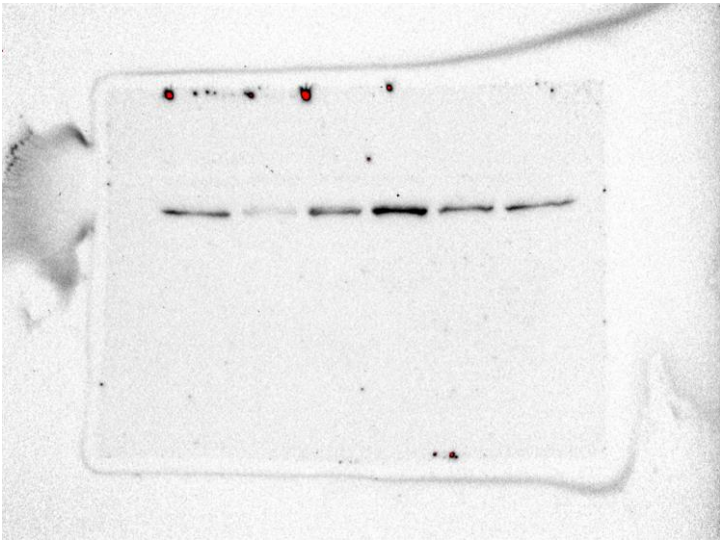

3

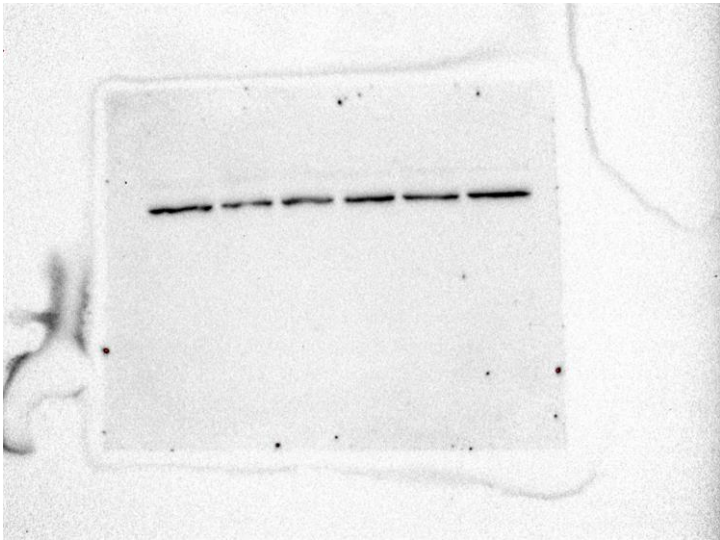

4

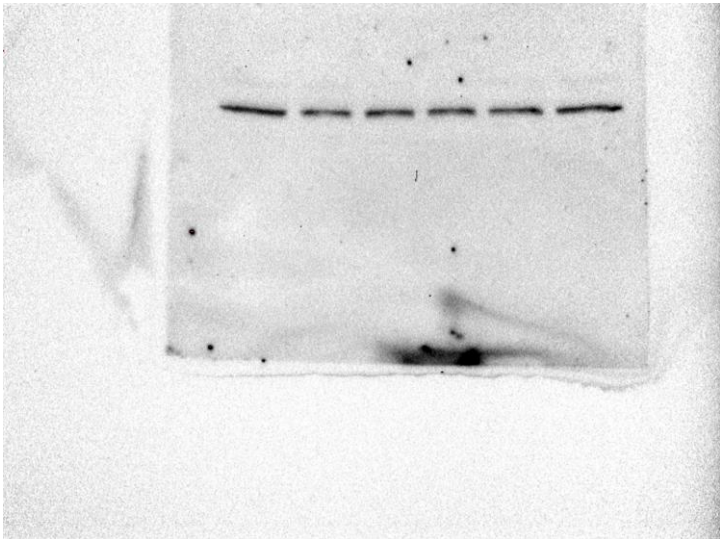

5

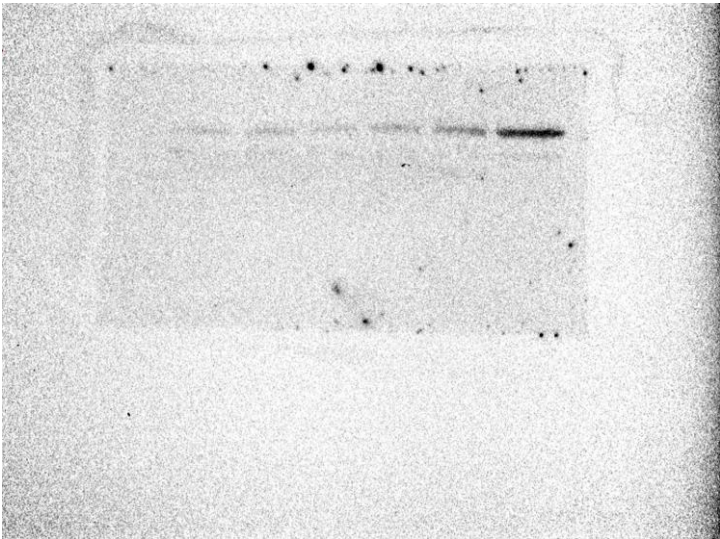

6

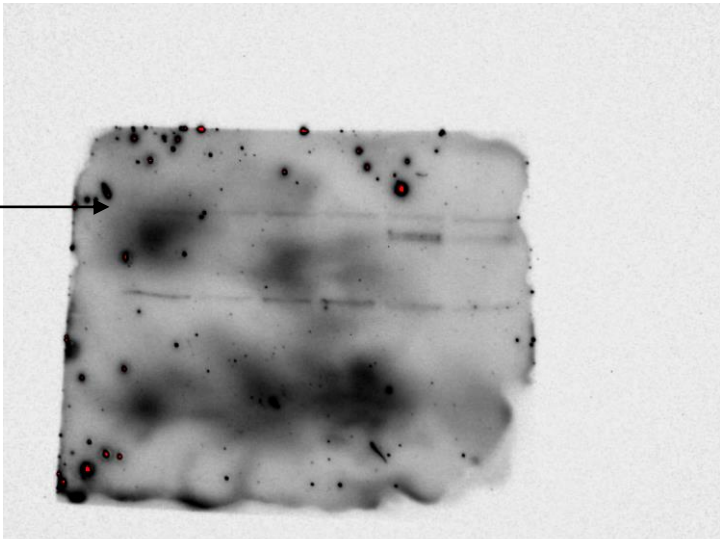

Supplement: s1 [file s1]
