# Supplementary material for: Cardiac Molecular Remodeling by Anticancer Drugs: Doxorubicin Affects More Metabolism While Mitoxantrone Impacts More Autophagy in Adult CD-1 Male Mice
Source: MDPI journal article supplement (doi:10.3390/biom13060921), 2023-05-31
Supplement: s1 [file s1]

**Supplementary Table S1.** Specification of the dilutions and catalog number for each primary antibody.

| Primary antibody               | Catalog number | Dilution used   | Primary antibody                | Catalog number | Dilution used   |
|--------------------------------|----------------|-----------------|---------------------------------|----------------|-----------------|
| <b>AMPK</b>                    | ab80039        | 1:1000          | <b>HSP70</b>                    | SPA-810        | 1:1000          |
| <b>ATG5</b>                    | ab108327       | 1:1000          | <b>LC3B</b>                     | L7543          | 1:1000          |
| <b>ATPB</b>                    | ab14730        | 1:1000          | <b>Mfn1</b>                     | sc-166644      | 1:1000          |
| <b>BAX</b>                     | ab32503        | 1:1000          | <b>pAMPK</b>                    | ab23875        | 1:1000          |
| <b>BCL2</b>                    | sc-7382        | 1:200           | <b>Parkin</b>                   | sc-32282       | 1:1000 or 1:500 |
| <b>Beclin1</b>                 | sc-48341       | 1:1000          | <b>PFKM</b>                     | ab154804       | 1:1000          |
| <b>BNIP3</b>                   | ab10433        | 1:1000          | <b>PGC-1<math>\alpha</math></b> | ab191838       | 1:1000          |
| <b>ETFDH</b>                   | ab91508        | 1:1000          | <b>PPAR<math>\alpha</math></b>  | ab24509        | 1:1000          |
| <b>GAPDH</b>                   | ab9485         | 1:1000          | <b>PPAR<math>\gamma</math></b>  | ab41928        | 1:1000 or 1:500 |
| <b>GLUT4</b>                   | ab48547        | 1:1000 or 1:500 | <b>SIRT3</b>                    | sc-49744       | 1:1000          |
| <b>GSK-3<math>\beta</math></b> | sc-377213      | 1:500           | <b>TFAM</b>                     | sc-28200       | 1:1000          |
| <b>HSP27</b>                   | sc-9012        | 1:500           |                                 |                |                 |
